# Supplementary material for: Mechanisms of Yinchen combined with Huangbai against Non-alcoholic fatty liver disease based on Network pharmacology, Molecular docking and Molecular Dynamics Simulations
Source: Research Square preprint supplement (doi:10.21203/rs.3.rs-7535069/v1), 2025-10-17
Supplement: Supplementary file 1 [file 2befead66360cd37e9cdef03.docx]

TABLE 3: Top ten targets information of PPI network.

| Target Name | Degree | Betweenness Centrality | Closeness Centrality |
| --- | --- | --- | --- |
| TNF | 97 | 0.131102 | 0.738693 |
| AKT1 | 94 | 0.093396 | 0.717073 |
| PPARG | 71 | 0.077929 | 0.653333 |
| STAT3 | 70 | 0.036671 | 0.63913 |
| HSP90AA1 | 69 | 0.042841 | 0.644737 |
| EGFR | 67 | 0.030506 | 0.628205 |
| CASP3 | 67 | 0.020684 | 0.630901 |
| HIF1A | 64 | 0.017044 | 0.6125 |
| CTNNB1 | 64 | 0.022983 | 0.622881 |
| ESR1 | 63 | 0.045299 | 0.620253 |
