# Supplementary material for: Mechanisms of Yinchen combined with Huangbai against Non-alcoholic fatty liver disease based on Network pharmacology, Molecular docking and Molecular Dynamics Simulations
Source: Research Square preprint supplement (doi:10.21203/rs.3.rs-7535069/v1), 2025-10-17
Supplement: Supplementary file 2 [file 3e66d6f0b89df2757f488573.docx]

TABLE 5: Molecular docking affinity information of active components and targets.

| Compound | Drug | Target | Affinity (Kcal/mol) |
| --- | --- | --- | --- |
| Genkwanin | Yinchen | TNF | -6.21 |
| Genkwanin | Yinchen | AKT1 | -6.21 |
| Genkwanin | Yinchen | PPARG | -7.36 |
| Genkwanin | Yinchen | STAT3 | -5.03 |
| Genkwanin | Yinchen | HSP90AA1 | -7.68 |
| Rutaecarpine | Huangbai | TNF | -7.63 |
| Rutaecarpine | Huangbai | AKT1 | -6.77 |
| Rutaecarpine | Huangbai | PPARG | -9.44 |
| Rutaecarpine | Huangbai | STAT3 | -6.5 |
| Rutaecarpine | Huangbai | HSP90AA1 | -6.9 |
