# Supplementary material for: Mechanisms of Yinchen combined with Huangbai against Non-alcoholic fatty liver disease based on Network pharmacology, Molecular docking and Molecular Dynamics Simulations
Source: Research Square preprint supplement (doi:10.21203/rs.3.rs-7535069/v1), 2025-10-17
Supplement: Supplementary file 3 [file 574de475b95d87538e5aa7a5.xlsx]

## Sheet: Sheet1
	MolID	Symbol
YC1	MOL008047	HNF4A
YC1	MOL008047	L3MBTL3
YC1	MOL008047	CPA1
YC1	MOL008047	RCE1
YC1	MOL008047	DPP4
YC1	MOL008047	PREP
YC1	MOL008047	DPP7
YC1	MOL008047	DPP8
YC1	MOL008047	FAP
YC1	MOL008047	DPP9
YC1	MOL008047	PDE4A
YC1	MOL008047	PDE4B
YC1	MOL008047	PDE4C
YC1	MOL008047	IMPDH1
YC1	MOL008047	PTGS2
YC1	MOL008047	PTGS1
YC1	MOL008047	GSR
YC1	MOL008047	ALOX5
YC1	MOL008047	SRD5A2
YC1	MOL008047	DHFR
YC1	MOL008047	CDK2
YC1	MOL008047	THRA
YC1	MOL008047	THRB
YC1	MOL008047	MKNK2
YC1	MOL008047	TGFBR1
YC1	MOL008047	ROCK2
YC1	MOL008047	GSK3A
YC1	MOL008047	PIM2
YC1	MOL008047	PDGFRB
YC1	MOL008047	JAK3
YC1	MOL008047	MAPK14
YC1	MOL008047	JAK2
YC1	MOL008047	CSF1R
YC1	MOL008047	PLK1
YC1	MOL008047	SYK
YC1	MOL008047	CSNK2A1
YC1	MOL008047	CHEK1
YC1	MOL008047	WEE1
YC1	MOL008047	MAPK8
YC1	MOL008047	MPI
YC1	MOL008047	PTGFR
YC1	MOL008047	OPRK1
YC1	MOL008047	TBXA2R
YC1	MOL008047	PTGER4
YC1	MOL008047	HRH1
YC1	MOL008047	PTGER2
YC1	MOL008047	CCKBR
YC1	MOL008047	S1PR5
YC1	MOL008047	AGTR1
YC1	MOL008047	S1PR1
YC1	MOL008047	ADRA2C
YC1	MOL008047	AKR1C3
YC1	MOL008047	HSD17B2
YC1	MOL008047	AMPD1
YC1	MOL008047	AMPD2
YC1	MOL008047	PIN1
YC2	MOL005573	TBXAS1
YC2	MOL005573	CYP2C9
YC2	MOL005573	ADORA1
YC2	MOL005573	ADORA2A
YC2	MOL005573	ESR2
YC2	MOL005573	PIM1
YC2	MOL005573	ESR1
YC2	MOL005573	ABCB1
YC2	MOL005573	AKR1B1
YC2	MOL005573	HSD17B1
YC2	MOL005573	CYP1B1
YC2	MOL005573	FLT3
YC2	MOL005573	ABCG2
YC2	MOL005573	CDK5R1
YC2	MOL005573	XDH
YC2	MOL005573	CYP19A1
YC2	MOL005573	CCNB3
YC2	MOL005573	CDK6
YC2	MOL005573	NOX4
YC2	MOL005573	ABCC1
YC2	MOL005573	PLG
YC2	MOL005573	PTPRS
YC2	MOL005573	AMY1A
YC2	MOL005573	GRK6
YC2	MOL005573	TNKS2
YC2	MOL005573	TNKS
YC2	MOL005573	MAOA
YC2	MOL005573	ACHE
YC2	MOL005573	GSK3B
YC2	MOL005573	TTR
YC2	MOL005573	CFTR
YC2	MOL005573	AKR1B10
YC2	MOL005573	CA2
YC2	MOL005573	CA1
YC2	MOL005573	CA12
YC2	MOL005573	CA9
YC2	MOL005573	AR
YC2	MOL005573	CA7
YC2	MOL005573	CA4
YC2	MOL005573	CBR1
YC2	MOL005573	TERT
YC2	MOL005573	SLC22A12
YC2	MOL005573	APP
YC2	MOL005573	ADORA3
YC2	MOL005573	KIT
YC2	MOL005573	OPRD1
YC2	MOL005573	EGFR
YC2	MOL005573	KDM4E
YC2	MOL005573	ALOX15
YC2	MOL005573	CDK1
YC2	MOL005573	ALOX12
YC2	MOL005573	NOS2
YC2	MOL005573	MCL1
YC2	MOL005573	NAE1
YC2	MOL005573	PARP1
YC2	MOL005573	LCK
YC2	MOL005573	PLA2G2A
YC2	MOL005573	SIGMAR1
YC2	MOL005573	PFKFB3
YC2	MOL005573	IGF1R
YC2	MOL005573	ARG1
YC2	MOL005573	GLO1
YC2	MOL005573	MMP9
YC2	MOL005573	MMP2
YC2	MOL005573	MMP12
YC2	MOL005573	CD38
YC2	MOL005573	TOP1
YC2	MOL005573	PIK3CG
YC2	MOL005573	TYR
YC2	MOL005573	AHR
YC2	MOL005573	ESRRA
YC2	MOL005573	ODC1
YC2	MOL005573	ST6GAL1
YC2	MOL005573	F2
YC2	MOL005573	CALM1
YC2	MOL005573	KDM5A
YC2	MOL005573	PPARG
YC2	MOL005573	CYP1A1
YC2	MOL005573	CYP1A2
YC2	MOL005573	PTPN1
YC2	MOL005573	MET
YC2	MOL005573	OPRM1
YC2	MOL005573	IKBKB
YC2	MOL005573	NTRK2
YC2	MOL005573	BACE1
YC2	MOL005573	AURKB
YC2	MOL005573	SRC
YC2	MOL005573	MAOB
YC2	MOL005573	PDE4D
YC2	MOL005573	GPR35
YC2	MOL005573	DAPK1
YC2	MOL005573	MPG
YC2	MOL005573	BCHE
YC2	MOL005573	FYN
YC2	MOL005573	TACR2
YC2	MOL005573	PRKDC
YC2	MOL005573	MAPK3
YC3	MOL008046	MGAM
YC3	MOL008046	HTR2A
YC3	MOL008046	HTR2C
YC3	MOL008046	ESRRB
YC3	MOL008046	IGFBP3
YC3	MOL008046	SNCA
YC3	MOL008046	MIF
YC3	MOL008046	CRHR1
YC3	MOL008046	DRD3
YC3	MOL008046	IGFBP6
YC3	MOL008046	IGFBP4
YC3	MOL008046	IGFBP5
YC3	MOL008046	IGFBP2
YC3	MOL008046	IGFBP1
YC3	MOL008046	AVPR2
YC3	MOL008046	DRD4
YC3	MOL008046	MPO
YC3	MOL008046	PIK3R1
YC3	MOL008046	PYGL
YC3	MOL008046	PTK2
YC3	MOL008046	MMP13
YC3	MOL008046	MMP3
YC3	MOL008046	PKN1
YC3	MOL008046	NEK2
YC3	MOL008046	CXCR1
YC3	MOL008046	CAMK2B
YC3	MOL008046	AKT1
YC3	MOL008046	NEK6
YC3	MOL008046	PLA2G1B
YC3	MOL008046	NUAK1
YC3	MOL008046	AKR1C2
YC3	MOL008046	AKR1C1
YC3	MOL008046	AKR1C4
YC3	MOL008046	AKR1A1
YC3	MOL008046	FNTA
YC3	MOL008046	PLAT
YC3	MOL008046	F10
YC3	MOL008046	PLAU
YC3	MOL008046	DHODH
YC3	MOL008046	BCL2L1
YC3	MOL008046	CDC7
YC3	MOL008046	KCNMA1
YC3	MOL008046	CES2
YC3	MOL008046	PTP4A3
YC4	MOL000098	KDR
YC4	MOL000098	CA3
YC4	MOL000098	CA6
YC4	MOL000098	CA14
YC4	MOL000098	ALK
YC4	MOL000098	CA5A
YC4	MOL000098	AXL
YC4	MOL000098	CA13
YC4	MOL000098	MAPT
YC4	MOL000098	TOP2A
YC4	MOL000098	INSR
YC4	MOL000098	MYLK
YC4	MOL000098	APEX1
YC5	MOL007274	TAS2R31
YC7	MOL008043	HSPA1A
YC7	MOL008043	PRSS1
YC7	MOL008043	SIRT1
YC7	MOL008043	HSP90B1
YC7	MOL008043	ALDH2
YC7	MOL008043	HSP90AB1
YC12	MOL000358	HMGCR
YC12	MOL000358	CYP51A1
YC12	MOL000358	NPC1L1
YC12	MOL000358	NR1H3
YC12	MOL000358	CYP17A1
YC12	MOL000358	RORC
YC12	MOL000358	SHBG
YC12	MOL000358	SREBF2
YC12	MOL000358	CYP2C19
YC12	MOL000358	SLC6A2
YC12	MOL000358	RORA
YC12	MOL000358	SERPINA6
YC12	MOL000358	SLC6A4
YC12	MOL000358	G6PD
YC12	MOL000358	NR1I3
YC12	MOL000358	CHRM2
YC12	MOL000358	VDR
YC12	MOL000358	NR1H2
YC12	MOL000358	CDC25A
YC12	MOL000358	PTGER1
YC12	MOL000358	HSD11B1
YC12	MOL000358	DHCR7
YC12	MOL000358	GLRA1
YC12	MOL000358	PPARD
YC12	MOL000358	SQLE
YC12	MOL000358	PTPN6
YC12	MOL000358	FDFT1
YC12	MOL000358	NR3C1
YC12	MOL000358	CDC25B
YC12	MOL000358	SHH
YC12	MOL000358	UGT2B7
YC12	MOL000358	HSD11B2
YC12	MOL000358	DRD2
YC12	MOL000358	POLB
HB1	MOL000622	BRD4
HB1	MOL000622	BRD2
HB1	MOL000622	FKBP1A
HB1	MOL000622	CTRC
HB1	MOL000622	PRKCA
HB1	MOL000622	JAK1
HB1	MOL000622	TYK2
HB1	MOL000622	CYP11B1
HB1	MOL000622	CYP11B2
HB1	MOL000622	LRRK2
HB1	MOL000622	PTGES
HB1	MOL000622	TRPM8
HB1	MOL000622	PDE10A
HB1	MOL000622	TAAR1
HB1	MOL000622	KCNA5
HB1	MOL000622	CREBBP
HB1	MOL000622	LIPA
HB1	MOL000622	HTR1D
HB1	MOL000622	PIK3CD
HB1	MOL000622	PIK3CB
HB1	MOL000622	AOC3
HB1	MOL000622	ABCC9
HB1	MOL000622	CXCR2
HB1	MOL000622	KCNJ11
HB1	MOL000622	PDCD4
HB1	MOL000622	ADRB2
HB1	MOL000622	ADRB1
HB1	MOL000622	ADRB3
HB2	MOL002663	KCNA3
HB2	MOL002663	ERBB2
HB2	MOL002663	GYS1
HB2	MOL002663	ADORA2B
HB2	MOL002663	MAPK10
HB2	MOL002663	MAPK11
HB2	MOL002663	MAPK9
HB2	MOL002663	ASIC3
HB2	MOL002663	HTR6
HB2	MOL002663	P2RX7
HB2	MOL002663	PDE7A
HB2	MOL002663	CCR2
HB2	MOL002663	GABRA1
HB2	MOL002663	GABRA5
HB2	MOL002663	TMIGD3
HB2	MOL002663	MTNR1A
HB2	MOL002663	MTNR1B
HB2	MOL002663	PPARA
HB2	MOL002663	PDE5A
HB2	MOL002663	EPHX1
HB2	MOL002663	NOS1
HB2	MOL002663	NOS3
HB2	MOL002663	PTK2B
HB2	MOL002663	ALPL
HB2	MOL002663	PGR
HB2	MOL002663	SLC6A3
HB2	MOL002663	PTPRG
HB2	MOL002663	CCR1
HB2	MOL002663	CCR4
HB2	MOL002663	IMPDH2
HB2	MOL002663	EDNRA
HB2	MOL002663	ELANE
HB2	MOL002663	TLR4
HB2	MOL002663	NMT1
HB2	MOL002663	CLK4
HB2	MOL002663	BDKRB2
HB4	MOL002644	PIK3CA
HB4	MOL002644	GABRB3
HB4	MOL002644	GABRA2
HB4	MOL002644	NUDT1
HB4	MOL002644	MCHR1
HB4	MOL002644	MTOR
HB4	MOL002644	CCNE2
HB4	MOL002644	DUT
HB4	MOL002644	PDE8B
HB4	MOL002644	SRD5A1
HB4	MOL002644	HCAR2
HB4	MOL002644	HSF1
HB4	MOL002644	SLC9A1
HB4	MOL002644	KCNH2
HB4	MOL002644	PDPK1
HB4	MOL002644	NAAA
HB4	MOL002644	DNMT3A
HB4	MOL002644	CCND3
HB4	MOL002644	RPS6KB1
HB4	MOL002644	PLA2G7
HB4	MOL002644	MAP2K1
HB4	MOL002644	HRH3
HB4	MOL002644	PTGER3
HB4	MOL002644	HRH4
HB4	MOL002644	HSP90AA1
HB4	MOL002644	PDE2A
HB4	MOL002644	DYRK1A
HB5	MOL001131	SLC5A1
HB5	MOL001131	SLC5A4
HB5	MOL001131	SLC5A2
HB5	MOL001131	RXRA
HB5	MOL001131	SLC28A3
HB5	MOL001131	TNF
HB5	MOL001131	CES1
HB5	MOL001131	MMP1
HB5	MOL001131	MMP7
HB5	MOL001131	MMP8
HB5	MOL001131	EPHX2
HB5	MOL001131	IL2
HB6	MOL002651	PTPN11
HB6	MOL002651	EED
HB6	MOL002651	PTPRC
HB6	MOL002651	NQO2
HB6	MOL002651	RBBP4
HB6	MOL002651	BRD3
HB6	MOL002651	PABPC1
HB6	MOL002651	CDC25C
HB6	MOL002651	BRS3
HB6	MOL002651	HCRTR2
HB6	MOL002651	HCRTR1
HB6	MOL002651	IDH1
HB6	MOL002651	ADRA1A
HB6	MOL002651	CACNA1C
HB6	MOL002651	EIF4H
HB6	MOL002651	TLR9
HB7	MOL002641	EIF4A1
HB7	MOL002641	LGALS4
HB7	MOL002641	LGALS3
HB7	MOL002641	LGALS8
HB7	MOL002641	SLC29A1
HB8	MOL000790	DRD1
HB8	MOL000790	HTR1A
HB8	MOL000790	F3
HB8	MOL000790	ADRA1D
HB8	MOL000790	DRD5
HB8	MOL000790	ADRA1B
HB8	MOL000790	HTR7
HB8	MOL000790	CHRM4
HB8	MOL000790	CHRNA4
HB8	MOL000790	CHRNA3
HB8	MOL000790	CHRNB4
HB8	MOL000790	KCNN1
HB8	MOL000790	KCNN2
HB8	MOL000790	RET
HB8	MOL000790	ADRA2A
HB8	MOL000790	MAPKAPK2
HB8	MOL000790	KCNN3
HB8	MOL000790	TUBB1
HB8	MOL000790	SLC47A1
HB8	MOL000790	RAF1
HB8	MOL000790	CTSS
HB8	MOL000790	ROS1
HB8	MOL000790	GCK
HB8	MOL000790	PDK1
HB8	MOL000790	MELK
HB8	MOL000790	NEK1
HB8	MOL000790	TUBB3
HB8	MOL000790	RBBP9
HB8	MOL000790	CCND1
HB8	MOL000790	EZR
HB8	MOL000790	HTR2B
HB8	MOL000790	ERN1
HB8	MOL000790	ABL1
HB8	MOL000790	HSD17B3
HB8	MOL000790	HDAC3
HB8	MOL000790	HDAC5
HB8	MOL000790	HDAC1
HB8	MOL000790	COMT
HB8	MOL000790	SPHK2
HB9	MOL002662	PRKCG
HB9	MOL002662	PRKCB
HB9	MOL002662	CASP3
HB9	MOL002662	CASP7
HB9	MOL002662	GRM5
HB9	MOL002662	VCP
HB9	MOL002662	CNR1
HB9	MOL002662	ADAMTS5
HB9	MOL002662	CAMK2D
HB9	MOL002662	ROCK1
HB9	MOL002662	CPB1
HB9	MOL002662	SIRT2
HB9	MOL002662	MME
HB9	MOL002662	CDK9
HB9	MOL002662	NPY5R
HB9	MOL002662	LIPE
HB9	MOL002662	DAPK3
HB9	MOL002662	MAP3K11
HB9	MOL002662	MAP3K9
HB9	MOL002662	MAP3K10
HB9	MOL002662	CTSB
HB9	MOL002662	MKNK1
HB9	MOL002662	PPIA
HB9	MOL002662	CCR9
HB9	MOL002662	GPR39
HB9	MOL002662	EIF2AK2
HB9	MOL002662	SAE1
HB9	MOL002662	PRCP
HB9	MOL002662	RBP4
HB9	MOL002662	AOC2
HB9	MOL002662	PRF1
HB9	MOL002662	TACR3
HB9	MOL002662	TNFRSF1A
HB9	MOL002662	PYGM
HB9	MOL002662	SCD
HB9	MOL002662	CCNC
HB9	MOL002662	ICAM1
HB9	MOL002662	SELE
HB9	MOL002662	GPR55
HB9	MOL002662	CHRM1
HB9	MOL002662	NR1I2
HB9	MOL002662	SCN9A
HB9	MOL002662	SCN5A
HB9	MOL002662	PGGT1B
HB9	MOL002662	CTSK
HB9	MOL002662	CTSL
HB9	MOL002662	GRM2
HB9	MOL002662	SLC6A1
HB9	MOL002662	CCKAR
HB10	MOL002672	MDM4
HB10	MOL002672	MDM2
HB10	MOL002672	CAPN2
HB10	MOL002672	SLC8A1
HB11	MOL000785	ADRA2B
HB11	MOL000785	CYP2D6
HB11	MOL000785	RAC1
HB11	MOL000785	CDC42
HB11	MOL000785	AURKA
HB11	MOL000785	TTK
HB11	MOL000785	PLK3
HB11	MOL000785	PLK2
HB11	MOL000785	PGK1
HB11	MOL000785	TRPC6
HB11	MOL000785	CDK8
HB11	MOL000785	HPGD
HB11	MOL000785	HTR3A
HB11	MOL000785	NQO1
HB11	MOL000785	NTRK1
HB11	MOL000785	MARK1
HB11	MOL000785	KDM5B
HB11	MOL000785	GRM1
HB11	MOL000785	LYN
HB11	MOL000785	EPHB4
HB11	MOL000785	TEK
HB11	MOL000785	SLC1A3
HB11	MOL000785	CLK1
HB11	MOL000785	DYRK2
HB11	MOL000785	TRPV1
HB11	MOL000785	CFD
HB11	MOL000785	FPR2
HB11	MOL000785	RPS6KA2
HB11	MOL000785	NAMPT
HB11	MOL000785	MST1R
HB11	MOL000785	CSNK1D
HB11	MOL000785	CDK4
HB11	MOL000785	FLT4
HB11	MOL000785	ITK
HB11	MOL000785	STAT3
HB12	MOL000762	CTNNB1
HB12	MOL000762	FTO
HB12	MOL000762	KLK1
HB12	MOL000762	KLK2
HB12	MOL000762	CNR2
HB12	MOL000762	FBP1
HB12	MOL000762	CCR5
HB12	MOL000762	RELA
HB12	MOL000762	LDHA
HB12	MOL000762	LDHB
HB12	MOL000762	BCL2
HB13	MOL002671	PRKCD
HB13	MOL002671	PRKCE
HB13	MOL002671	PRKCH
HB13	MOL002671	PRKCQ
HB13	MOL002671	TRPV4
HB13	MOL002671	MAPK1
HB13	MOL002671	IKBKE
HB13	MOL002671	TBK1
HB13	MOL002671	AVPR1A
HB13	MOL002671	REN
HB13	MOL002671	LIMK1
HB13	MOL002671	BDKRB1
HB13	MOL002671	GHSR
HB13	MOL002671	PSEN2
HB13	MOL002671	CTSD
HB13	MOL002671	CASP8
HB13	MOL002671	CASP1
HB13	MOL002671	S1PR3
HB13	MOL002671	LIMK2
HB13	MOL002671	IRAK4
HB13	MOL002671	ADAM17
HB13	MOL002671	PSMB5
HB13	MOL002671	YES1
HB13	MOL002671	BACE2
HB13	MOL002671	MC4R
HB13	MOL002671	MC1R
HB13	MOL002671	FGFR2
HB13	MOL002671	MC5R
HB13	MOL002671	MC3R
HB13	MOL002671	CETP
HB13	MOL002671	MAP3K14
HB14	MOL002643	ATP12A
HB14	MOL002643	FABP4
HB14	MOL002643	FABP3
HB14	MOL002643	FABP5
HB14	MOL002643	FABP1
HB14	MOL002643	PTPRF
HB14	MOL002643	ACP1
HB15	MOL002652	CHRM3
HB15	MOL002652	CHRM5
HB15	MOL002652	CHRNA7
HB15	MOL002652	KISS1R
HB15	MOL002652	HTR1B
HB15	MOL002652	PRMT3
HB15	MOL002652	OPRL1
HB16	MOL002656	IL6ST
HB16	MOL002656	NR1H4
HB16	MOL002656	GPBAR1
HB16	MOL002656	CYP24A1
HB16	MOL002656	LSS
HB16	MOL002656	GPR18
HB16	MOL002656	CYP27B1
HB16	MOL002656	INCENP
HB16	MOL002656	TACR1
HB16	MOL002656	HIF1A
HB16	MOL002656	KIF11
HB16	MOL002656	SMO
HB16	MOL002656	HPGDS
HB17	MOL002660	GCGR
HB17	MOL002660	NR3C2
HB17	MOL002660	TRPA1
HB17	MOL002660	FAAH
HB17	MOL002660	C5AR1
HB17	MOL002660	RASGRP1
HB17	MOL002660	TYRO3
HB17	MOL002660	MERTK
HB17	MOL002660	F2R
HB17	MOL002660	CXCR3
HB17	MOL002660	S1PR2
HB17	MOL002660	P2RX3
HB17	MOL002660	ADA
HB17	MOL002660	ALOX5AP
HB17	MOL002660	OXTR
HB17	MOL002660	SLC10A2
HB17	MOL002660	FLT1
HB17	MOL002660	FGFR1
HB18	MOL002666	TDP2
HB18	MOL002666	GRIA1
HB18	MOL002666	BAD
HB18	MOL002666	TYMS
HB18	MOL002666	XBP1
HB18	MOL002666	PHLPP2
HB18	MOL002666	PI4KB
HB18	MOL002666	PI4KA
HB18	MOL002666	QPCT
HB18	MOL002666	CHEK2
HB18	MOL002666	GRK5
HB18	MOL002666	BCAT2
HB18	MOL002666	MAP3K8
HB18	MOL002666	RPS6KA3
HB18	MOL002666	BRAF
HB18	MOL002666	TGM2
HB18	MOL002666	GPR84
HB18	MOL002666	DNM1
HB18	MOL002666	PLAA
HB18	MOL002666	MAP4K4
HB18	MOL002666	HDAC6
HB18	MOL002666	HDAC2
HB18	MOL002666	HDAC7
HB18	MOL002666	CCNE1
HB18	MOL002666	HDAC8
HB18	MOL002666	HDAC11
HB19	MOL002668	ADK
HB19	MOL002668	STS
HB20	MOL002670	SLC18A2
HB20	MOL002670	CSNK1G1
HB20	MOL002670	RPS6KA1
HB20	MOL002670	MARS
HB20	MOL002670	PARP2
HB20	MOL002670	BTK
HB21	MOL002673	CHUK
HB21	MOL002673	MAP2
HB21	MOL002673	AURKAIP1
HB21	MOL002673	SORD
HB21	MOL002673	CLK2
HB21	MOL002673	DYRK1B
HB21	MOL002673	CASR
HB21	MOL002673	MAP3K7
HB21	MOL002673	GC
HB21	MOL002673	ACVRL1
HB21	MOL002673	MAST3
HB21	MOL002673	PDE3A
HB21	MOL002673	PDE3B
HB21	MOL002673	AMPD3
HB21	MOL002673	CCNT1
HB21	MOL002673	STAT6
HB23	MOL006401	PTAFR
HB23	MOL006401	PER2
HB23	MOL006401	CALCRL
HB23	MOL006401	ICMT
HB23	MOL006401	CYP3A4
HB23	MOL006401	PKM
HB23	MOL006401	GABBR2
HB23	MOL006401	RIPK2
HB23	MOL006401	MAP3K5
HB23	MOL006401	RHOA
HB23	MOL006401	CAPN1
HB23	MOL006401	IDO1
HB23	MOL006401	TNNC1
HB23	MOL006401	CTSV
HB23	MOL006401	MAPK13
HB24	MOL006413	PTPN2
HB24	MOL006413	PDGFRA
HB24	MOL006413	EPHB3
HB24	MOL006413	KCNK3
HB26	MOL013352	WNT3A
HB26	MOL013352	SMYD2
HB26	MOL013352	HDAC4
HB26	MOL013352	FASN
