# Supplementary material for: Mechanisms of Yinchen combined with Huangbai against Non-alcoholic fatty liver disease based on Network pharmacology, Molecular docking and Molecular Dynamics Simulations
Source: Research Square preprint supplement (doi:10.21203/rs.3.rs-7535069/v1), 2025-10-17
Supplement: Supplementary file 4 [file 8faf430d854c33252318533c.xlsx]

## Sheet: Sheet1
Shared name	name	type	AverageShortestPathLength	ClusteringCofficient	ClosenessCentrality	IsSingleNode	PartnerOfMultiEdgeNodePairs	Selfloops	Eccentricity	Stress	Degree	BetweennessCentrality	NeighborhoodConnectivity	NumberOfDirectedEdges	NumberOfUndirectedEdges	Radiality	TopologicalCoefficient	Degree.layout
MOL005573	MOL005573	YC	3.67742	0	0.27193	FALSE	0	0	5	8650	26	0.25138	1.42308	0	26	0.897022	0.0384615	26
HB	HB	Drug	2.62903	0	0.380368	FALSE	0	0	4	27648	26	0.803487	4.19231	0	26	0.937345	0.0384615
MOL002662	MOL002662	HB	3.46237	0	0.28882	FALSE	0	0	5	5340	16	0.155187	2.5625	0	16	0.905294	0.0625	16
MOL000358	MOL000358	YC	3.80645	0	0.262712	FALSE	0	0	5	4654	14	0.135251	1.78571	0	14	0.89206	0.0714286	14
YC	YC	Drug	2.95161	0	0.338798	FALSE	0	0	4	21508	12	0.625051	6.58333	0	12	0.924938	0.0833333
MOL008046	MOL008046	YC	3.82796	0	0.261236	FALSE	0	0	5	3960	12	0.115083	1.91667	0	12	0.891232	0.0833333	12
MOL008047	MOL008047	YC	3.83871	0	0.260504	FALSE	0	0	5	3610	11	0.104911	2	0	11	0.890819	0.0909091	11
MOL000785	MOL000785	HB	3.54839	0	0.281818	FALSE	0	0	5	2548	8	0.0740482	4.125	0	8	0.901985	0.125	8
MOL008043	MOL008043	YC	3.87097	0	0.258333	FALSE	0	0	5	2548	8	0.0740482	2.375	0	8	0.889578	0.125	8
MOL002663	MOL002663	HB	3.54839	0	0.281818	FALSE	0	0	5	2548	8	0.0740482	4.125	0	8	0.901985	0.125	8
MOL000622	MOL000622	HB	3.56989	0	0.28012	FALSE	0	0	5	1830	6	0.0531822	5.16667	0	6	0.901158	0.166667	6
MOL000762	MOL000762	HB	3.56989	0	0.28012	FALSE	0	0	5	1830	6	0.0531822	5.16667	0	6	0.901158	0.166667	6
MOL006401	MOL006401	HB	3.56989	0	0.28012	FALSE	0	0	5	1830	6	0.0531822	5.16667	0	6	0.901158	0.166667	6
MOL002666	MOL002666	HB	3.56989	0	0.28012	FALSE	0	0	5	1830	6	0.0531822	5.16667	0	6	0.901158	0.166667	6
MOL002671	MOL002671	HB	3.58065	0	0.279279	FALSE	0	0	5	1468	5	0.042662	6	0	5	0.900744	0.2	5
MOL002644	MOL002644	HB	3.58065	0	0.279279	FALSE	0	0	5	1468	5	0.042662	6	0	5	0.900744	0.2	5
MOL002656	MOL002656	HB	3.5914	0	0.278443	FALSE	0	0	5	1104	4	0.0320837	7.25	0	4	0.900331	0.25	4
MOL002660	MOL002660	HB	3.5914	0	0.278443	FALSE	0	0	5	1104	4	0.0320837	7.25	0	4	0.900331	0.25	4
MOL000790	MOL000790	HB	3.5914	0	0.278443	FALSE	0	0	5	1104	4	0.0320837	7.25	0	4	0.900331	0.25	4
MOL002673	MOL002673	HB	3.5914	0	0.278443	FALSE	0	0	5	1104	4	0.0320837	7.25	0	4	0.900331	0.25	4
MOL001131	MOL001131	HB	3.5914	0	0.278443	FALSE	0	0	5	1104	4	0.0320837	7.25	0	4	0.900331	0.25	4
MOL002643	MOL002643	HB	3.60215	0	0.277612	FALSE	0	0	5	738	3	0.0214473	9.33333	0	3	0.899917	0.333333	3
MOL002651	MOL002651	HB	3.60215	0	0.277612	FALSE	0	0	5	738	3	0.0214473	9.33333	0	3	0.899917	0.333333	3
MOL013352	MOL013352	HB	3.60215	0	0.277612	FALSE	0	0	5	738	3	0.0214473	9.33333	0	3	0.899917	0.333333	3
MOL002641	MOL002641	HB	3.60215	0	0.277612	FALSE	0	0	5	738	3	0.0214473	9.33333	0	3	0.899917	0.333333	3
MOL002652	MOL002652	HB	3.6129	0	0.276786	FALSE	0	0	5	370	2	0.0107527	13.5	0	2	0.899504	0.5	2
MOL002672	MOL002672	HB	3.6129	0	0.276786	FALSE	0	0	5	370	2	0.0107527	13.5	0	2	0.899504	0.5	2
MOL000098	MOL000098	CF	2.78495	0	0.359073	FALSE	0	0	3	16848	2	0.489625	19	0	2	0.931348	0.5
ADRB2	ADRB2	gene	4.56452	0	0.219081	FALSE	0	0	6	0	1	0	6	0	1	0.862903	0	1
PRKDC	PRKDC	gene	4.67204	0	0.214039	FALSE	0	0	6	0	1	0	26	0	1	0.858768	0	1
PTGS2	PTGS2	gene	4.83333	0	0.206897	FALSE	0	0	6	0	1	0	11	0	1	0.852564	0	1
MAP3K7	MAP3K7	gene	4.58602	0	0.218054	FALSE	0	0	6	0	1	0	4	0	1	0.862076	0	1
PPARA	PPARA	gene	4.54301	0	0.220118	FALSE	0	0	6	0	1	0	8	0	1	0.86373	0	1
AKT1	AKT1	gene	4.82258	0	0.207358	FALSE	0	0	6	0	1	0	12	0	1	0.852978	0	1
SHBG	SHBG	gene	4.80108	0	0.208287	FALSE	0	0	6	0	1	0	14	0	1	0.853805	0	1
GSK3B	GSK3B	gene	4.67204	0	0.214039	FALSE	0	0	6	0	1	0	26	0	1	0.858768	0	1
HSP90AA1	HSP90AA1	gene	4.57527	0	0.218566	FALSE	0	0	6	0	1	0	5	0	1	0.86249	0	1
APP	APP	gene	4.67204	0	0.214039	FALSE	0	0	6	0	1	0	26	0	1	0.858768	0	1
ADRB3	ADRB3	gene	4.56452	0	0.219081	FALSE	0	0	6	0	1	0	6	0	1	0.862903	0	1
NOS3	NOS3	gene	4.54301	0	0.220118	FALSE	0	0	6	0	1	0	8	0	1	0.86373	0	1
CNR1	CNR1	gene	4.45699	0	0.224367	FALSE	0	0	6	0	1	0	16	0	1	0.867039	0	1
HSPA1A	HSPA1A	gene	4.86559	0	0.205525	FALSE	0	0	6	0	1	0	8	0	1	0.851323	0	1
TTR	TTR	gene	4.67204	0	0.214039	FALSE	0	0	6	0	1	0	26	0	1	0.858768	0	1
SCD	SCD	gene	4.45699	0	0.224367	FALSE	0	0	6	0	1	0	16	0	1	0.867039	0	1
HSD11B1	HSD11B1	gene	4.80108	0	0.208287	FALSE	0	0	6	0	1	0	14	0	1	0.853805	0	1
PRKCE	PRKCE	gene	4.57527	0	0.218566	FALSE	0	0	6	0	1	0	5	0	1	0.86249	0	1
DPP4	DPP4	gene	4.83333	0	0.206897	FALSE	0	0	6	0	1	0	11	0	1	0.852564	0	1
ALOX12	ALOX12	gene	4.67204	0	0.214039	FALSE	0	0	6	0	1	0	26	0	1	0.858768	0	1
FDFT1	FDFT1	gene	4.80108	0	0.208287	FALSE	0	0	6	0	1	0	14	0	1	0.853805	0	1
AKR1B10	AKR1B10	gene	4.67204	0	0.214039	FALSE	0	0	6	0	1	0	26	0	1	0.858768	0	1
MAP3K8	MAP3K8	gene	4.56452	0	0.219081	FALSE	0	0	6	0	1	0	6	0	1	0.862903	0	1
RBP4	RBP4	gene	4.45699	0	0.224367	FALSE	0	0	6	0	1	0	16	0	1	0.867039	0	1
MAPK13	MAPK13	gene	4.56452	0	0.219081	FALSE	0	0	6	0	1	0	6	0	1	0.862903	0	1
LGALS3	LGALS3	gene	4.59677	0	0.217544	FALSE	0	0	6	0	1	0	3	0	1	0.861663	0	1
CETP	CETP	gene	4.57527	0	0.218566	FALSE	0	0	6	0	1	0	5	0	1	0.86249	0	1
CDK8	CDK8	gene	4.54301	0	0.220118	FALSE	0	0	6	0	1	0	8	0	1	0.86373	0	1
ESR1	ESR1	gene	4.67204	0	0.214039	FALSE	0	0	6	0	1	0	26	0	1	0.858768	0	1
CYP1A1	CYP1A1	gene	4.67204	0	0.214039	FALSE	0	0	6	0	1	0	26	0	1	0.858768	0	1
CCR9	CCR9	gene	4.45699	0	0.224367	FALSE	0	0	6	0	1	0	16	0	1	0.867039	0	1
MAPK14	MAPK14	gene	4.83333	0	0.206897	FALSE	0	0	6	0	1	0	11	0	1	0.852564	0	1
HDAC8	HDAC8	gene	4.56452	0	0.219081	FALSE	0	0	6	0	1	0	6	0	1	0.862903	0	1
AGTR1	AGTR1	gene	4.83333	0	0.206897	FALSE	0	0	6	0	1	0	11	0	1	0.852564	0	1
MMP2	MMP2	gene	4.67204	0	0.214039	FALSE	0	0	6	0	1	0	26	0	1	0.858768	0	1
F2	F2	gene	4.67204	0	0.214039	FALSE	0	0	6	0	1	0	26	0	1	0.858768	0	1
MIF	MIF	gene	4.82258	0	0.207358	FALSE	0	0	6	0	1	0	12	0	1	0.852978	0	1
GC	GC	gene	4.58602	0	0.218054	FALSE	0	0	6	0	1	0	4	0	1	0.862076	0	1
VDR	VDR	gene	4.80108	0	0.208287	FALSE	0	0	6	0	1	0	14	0	1	0.853805	0	1
ELANE	ELANE	gene	4.54301	0	0.220118	FALSE	0	0	6	0	1	0	8	0	1	0.86373	0	1
XBP1	XBP1	gene	4.56452	0	0.219081	FALSE	0	0	6	0	1	0	6	0	1	0.862903	0	1
CHUK	CHUK	gene	4.58602	0	0.218054	FALSE	0	0	6	0	1	0	4	0	1	0.862076	0	1
LIPA	LIPA	gene	4.56452	0	0.219081	FALSE	0	0	6	0	1	0	6	0	1	0.862903	0	1
FPR2	FPR2	gene	4.54301	0	0.220118	FALSE	0	0	6	0	1	0	8	0	1	0.86373	0	1
PTPN1	PTPN1	gene	4.67204	0	0.214039	FALSE	0	0	6	0	1	0	26	0	1	0.858768	0	1
CYP2C19	CYP2C19	gene	4.80108	0	0.208287	FALSE	0	0	6	0	1	0	14	0	1	0.853805	0	1
MOL006422	MOL006422	HB	3.62366	0	0.275964	FALSE	0	0	5	0	1	0	26	0	1	0.89909	0	1
CCNC	CCNC	gene	4.45699	0	0.224367	FALSE	0	0	6	0	1	0	16	0	1	0.867039	0	1
MTOR	MTOR	gene	4.57527	0	0.218566	FALSE	0	0	6	0	1	0	5	0	1	0.86249	0	1
MOL005438	MOL005438	HB	3.62366	0	0.275964	FALSE	0	0	5	0	1	0	26	0	1	0.89909	0	1
VCP	VCP	gene	4.45699	0	0.224367	FALSE	0	0	6	0	1	0	16	0	1	0.867039	0	1
NOX4	NOX4	gene	4.67204	0	0.214039	FALSE	0	0	6	0	1	0	26	0	1	0.858768	0	1
PRMT3	PRMT3	gene	4.60753	0	0.217036	FALSE	0	0	6	0	1	0	2	0	1	0.861249	0	1
XDH	XDH	gene	4.67204	0	0.214039	FALSE	0	0	6	0	1	0	26	0	1	0.858768	0	1
FABP4	FABP4	gene	4.59677	0	0.217544	FALSE	0	0	6	0	1	0	3	0	1	0.861663	0	1
CASP3	CASP3	gene	4.45699	0	0.224367	FALSE	0	0	6	0	1	0	16	0	1	0.867039	0	1
BCL2	BCL2	gene	4.56452	0	0.219081	FALSE	0	0	6	0	1	0	6	0	1	0.862903	0	1
GRM5	GRM5	gene	4.45699	0	0.224367	FALSE	0	0	6	0	1	0	16	0	1	0.867039	0	1
IDH1	IDH1	gene	4.59677	0	0.217544	FALSE	0	0	6	0	1	0	3	0	1	0.861663	0	1
PABPC1	PABPC1	gene	4.59677	0	0.217544	FALSE	0	0	6	0	1	0	3	0	1	0.861663	0	1
CCR2	CCR2	gene	4.54301	0	0.220118	FALSE	0	0	6	0	1	0	8	0	1	0.86373	0	1
IDO1	IDO1	gene	4.56452	0	0.219081	FALSE	0	0	6	0	1	0	6	0	1	0.862903	0	1
CDK4	CDK4	gene	4.54301	0	0.220118	FALSE	0	0	6	0	1	0	8	0	1	0.86373	0	1
CES2	CES2	gene	4.82258	0	0.207358	FALSE	0	0	6	0	1	0	12	0	1	0.852978	0	1
AHR	AHR	gene	4.67204	0	0.214039	FALSE	0	0	6	0	1	0	26	0	1	0.858768	0	1
IGFBP5	IGFBP5	gene	4.82258	0	0.207358	FALSE	0	0	6	0	1	0	12	0	1	0.852978	0	1
MOL008041	MOL008041	YC	3.94624	0	0.253406	FALSE	0	0	5	0	1	0	12	0	1	0.886683	0	1
NAMPT	NAMPT	gene	4.54301	0	0.220118	FALSE	0	0	6	0	1	0	8	0	1	0.86373	0	1
NR1I3	NR1I3	gene	4.80108	0	0.208287	FALSE	0	0	6	0	1	0	14	0	1	0.853805	0	1
PIK3CA	PIK3CA	gene	4.57527	0	0.218566	FALSE	0	0	6	0	1	0	5	0	1	0.86249	0	1
MOL002668	MOL002668	HB	3.62366	0	0.275964	FALSE	0	0	5	0	1	0	26	0	1	0.89909	0	1
PDGFRB	PDGFRB	gene	4.83333	0	0.206897	FALSE	0	0	6	0	1	0	11	0	1	0.852564	0	1
IGF1R	IGF1R	gene	4.67204	0	0.214039	FALSE	0	0	6	0	1	0	26	0	1	0.858768	0	1
HSP90B1	HSP90B1	gene	4.86559	0	0.205525	FALSE	0	0	6	0	1	0	8	0	1	0.851323	0	1
PREP	PREP	gene	4.83333	0	0.206897	FALSE	0	0	6	0	1	0	11	0	1	0.852564	0	1
CYP1A2	CYP1A2	gene	4.67204	0	0.214039	FALSE	0	0	6	0	1	0	26	0	1	0.858768	0	1
SIRT1	SIRT1	gene	4.86559	0	0.205525	FALSE	0	0	6	0	1	0	8	0	1	0.851323	0	1
CYP3A4	CYP3A4	gene	4.56452	0	0.219081	FALSE	0	0	6	0	1	0	6	0	1	0.862903	0	1
PPARD	PPARD	gene	4.80108	0	0.208287	FALSE	0	0	6	0	1	0	14	0	1	0.853805	0	1
CYP2D6	CYP2D6	gene	4.54301	0	0.220118	FALSE	0	0	6	0	1	0	8	0	1	0.86373	0	1
NR1H4	NR1H4	gene	4.58602	0	0.218054	FALSE	0	0	6	0	1	0	4	0	1	0.862076	0	1
LIPE	LIPE	gene	4.45699	0	0.224367	FALSE	0	0	6	0	1	0	16	0	1	0.867039	0	1
EIF4A1	EIF4A1	gene	4.59677	0	0.217544	FALSE	0	0	6	0	1	0	3	0	1	0.861663	0	1
TNF	TNF	gene	4.58602	0	0.218054	FALSE	0	0	6	0	1	0	4	0	1	0.862076	0	1
MOL006413	MOL006413	HB	3.62366	0	0.275964	FALSE	0	0	5	0	1	0	26	0	1	0.89909	0	1
ERN1	ERN1	gene	4.58602	0	0.218054	FALSE	0	0	6	0	1	0	4	0	1	0.862076	0	1
CES1	CES1	gene	4.58602	0	0.218054	FALSE	0	0	6	0	1	0	4	0	1	0.862076	0	1
CXCR3	CXCR3	gene	4.58602	0	0.218054	FALSE	0	0	6	0	1	0	4	0	1	0.862076	0	1
TNFRSF1A	TNFRSF1A	gene	4.45699	0	0.224367	FALSE	0	0	6	0	1	0	16	0	1	0.867039	0	1
EGFR	EGFR	gene	4.67204	0	0.214039	FALSE	0	0	6	0	1	0	26	0	1	0.858768	0	1
HNF4A	HNF4A	gene	4.83333	0	0.206897	FALSE	0	0	6	0	1	0	11	0	1	0.852564	0	1
SRD5A2	SRD5A2	gene	4.83333	0	0.206897	FALSE	0	0	6	0	1	0	11	0	1	0.852564	0	1
CYP2C9	CYP2C9	gene	4.67204	0	0.214039	FALSE	0	0	6	0	1	0	26	0	1	0.858768	0	1
IGFBP3	IGFBP3	gene	4.82258	0	0.207358	FALSE	0	0	6	0	1	0	12	0	1	0.852978	0	1
MMP13	MMP13	gene	4.82258	0	0.207358	FALSE	0	0	6	0	1	0	12	0	1	0.852978	0	1
PRKCD	PRKCD	gene	4.57527	0	0.218566	FALSE	0	0	6	0	1	0	5	0	1	0.86249	0	1
NR1H3	NR1H3	gene	4.80108	0	0.208287	FALSE	0	0	6	0	1	0	14	0	1	0.853805	0	1
AKR1A1	AKR1A1	gene	4.82258	0	0.207358	FALSE	0	0	6	0	1	0	12	0	1	0.852978	0	1
CTSD	CTSD	gene	4.57527	0	0.218566	FALSE	0	0	6	0	1	0	5	0	1	0.86249	0	1
CTNNB1	CTNNB1	gene	4.56452	0	0.219081	FALSE	0	0	6	0	1	0	6	0	1	0.862903	0	1
NR1H2	NR1H2	gene	4.80108	0	0.208287	FALSE	0	0	6	0	1	0	14	0	1	0.853805	0	1
FLT1	FLT1	gene	4.58602	0	0.218054	FALSE	0	0	6	0	1	0	4	0	1	0.862076	0	1
AOC3	AOC3	gene	4.56452	0	0.219081	FALSE	0	0	6	0	1	0	6	0	1	0.862903	0	1
IL6ST	IL6ST	gene	4.58602	0	0.218054	FALSE	0	0	6	0	1	0	4	0	1	0.862076	0	1
FTO	FTO	gene	4.56452	0	0.219081	FALSE	0	0	6	0	1	0	6	0	1	0.862903	0	1
ROCK1	ROCK1	gene	4.45699	0	0.224367	FALSE	0	0	6	0	1	0	16	0	1	0.867039	0	1
SHH	SHH	gene	4.80108	0	0.208287	FALSE	0	0	6	0	1	0	14	0	1	0.853805	0	1
TERT	TERT	gene	4.67204	0	0.214039	FALSE	0	0	6	0	1	0	26	0	1	0.858768	0	1
NPC1L1	NPC1L1	gene	4.80108	0	0.208287	FALSE	0	0	6	0	1	0	14	0	1	0.853805	0	1
HCAR2	HCAR2	gene	4.57527	0	0.218566	FALSE	0	0	6	0	1	0	5	0	1	0.86249	0	1
RELA	RELA	gene	4.56452	0	0.219081	FALSE	0	0	6	0	1	0	6	0	1	0.862903	0	1
PARP1	PARP1	gene	4.67204	0	0.214039	FALSE	0	0	6	0	1	0	26	0	1	0.858768	0	1
MDM2	MDM2	gene	4.60753	0	0.217036	FALSE	0	0	6	0	1	0	2	0	1	0.861249	0	1
F3	F3	gene	4.58602	0	0.218054	FALSE	0	0	6	0	1	0	4	0	1	0.862076	0	1
TLR4	TLR4	gene	4.54301	0	0.220118	FALSE	0	0	6	0	1	0	8	0	1	0.86373	0	1
FABP1	FABP1	gene	4.59677	0	0.217544	FALSE	0	0	6	0	1	0	3	0	1	0.861663	0	1
MOL002670	MOL002670	HB	3.62366	0	0.275964	FALSE	0	0	5	0	1	0	26	0	1	0.89909	0	1
FASN	FASN	gene	4.59677	0	0.217544	FALSE	0	0	6	0	1	0	3	0	1	0.861663	0	1
HIF1A	HIF1A	gene	4.58602	0	0.218054	FALSE	0	0	6	0	1	0	4	0	1	0.862076	0	1
MMP9	MMP9	gene	4.67204	0	0.214039	FALSE	0	0	6	0	1	0	26	0	1	0.858768	0	1
IGFBP2	IGFBP2	gene	4.82258	0	0.207358	FALSE	0	0	6	0	1	0	12	0	1	0.852978	0	1
PLAU	PLAU	gene	4.82258	0	0.207358	FALSE	0	0	6	0	1	0	12	0	1	0.852978	0	1
HMGCR	HMGCR	gene	4.80108	0	0.208287	FALSE	0	0	6	0	1	0	14	0	1	0.853805	0	1
MOL008045	MOL008045	YC	3.94624	0	0.253406	FALSE	0	0	5	0	1	0	12	0	1	0.886683	0	1
ALDH2	ALDH2	gene	4.86559	0	0.205525	FALSE	0	0	6	0	1	0	8	0	1	0.851323	0	1
HTR2A	HTR2A	gene	4.82258	0	0.207358	FALSE	0	0	6	0	1	0	12	0	1	0.852978	0	1
P2RX7	P2RX7	gene	4.54301	0	0.220118	FALSE	0	0	6	0	1	0	8	0	1	0.86373	0	1
PKM	PKM	gene	4.56452	0	0.219081	FALSE	0	0	6	0	1	0	6	0	1	0.862903	0	1
RPS6KA3	RPS6KA3	gene	4.56452	0	0.219081	FALSE	0	0	6	0	1	0	6	0	1	0.862903	0	1
ICAM1	ICAM1	gene	4.45699	0	0.224367	FALSE	0	0	6	0	1	0	16	0	1	0.867039	0	1
MOL000354	MOL000354	YC	3.94624	0	0.253406	FALSE	0	0	5	0	1	0	12	0	1	0.886683	0	1
GPR55	GPR55	gene	4.45699	0	0.224367	FALSE	0	0	6	0	1	0	16	0	1	0.867039	0	1
STAT3	STAT3	gene	4.54301	0	0.220118	FALSE	0	0	6	0	1	0	8	0	1	0.86373	0	1
MERTK	MERTK	gene	4.58602	0	0.218054	FALSE	0	0	6	0	1	0	4	0	1	0.862076	0	1
TGFBR1	TGFBR1	gene	4.83333	0	0.206897	FALSE	0	0	6	0	1	0	11	0	1	0.852564	0	1
AR	AR	gene	4.67204	0	0.214039	FALSE	0	0	6	0	1	0	26	0	1	0.858768	0	1
ALK	ALK	gene	4.86559	0	0.205525	FALSE	0	0	6	0	1	0	8	0	1	0.851323	0	1
MOL008039	MOL008039	YC	3.94624	0	0.253406	FALSE	0	0	5	0	1	0	12	0	1	0.886683	0	1
HSP90AB1	HSP90AB1	gene	4.86559	0	0.205525	FALSE	0	0	6	0	1	0	8	0	1	0.851323	0	1
INSR	INSR	gene	4.86559	0	0.205525	FALSE	0	0	6	0	1	0	8	0	1	0.851323	0	1
MAP3K5	MAP3K5	gene	4.56452	0	0.219081	FALSE	0	0	6	0	1	0	6	0	1	0.862903	0	1
CNR2	CNR2	gene	4.56452	0	0.219081	FALSE	0	0	6	0	1	0	6	0	1	0.862903	0	1
MOL007274	MOL007274	YC	3.94624	0	0.253406	FALSE	0	0	5	0	1	0	12	0	1	0.886683	0	1
MMP7	MMP7	gene	4.58602	0	0.218054	FALSE	0	0	6	0	1	0	4	0	1	0.862076	0	1
MOL008040	MOL008040	YC	3.94624	0	0.253406	FALSE	0	0	5	0	1	0	12	0	1	0.886683	0	1
LRRK2	LRRK2	gene	4.56452	0	0.219081	FALSE	0	0	6	0	1	0	6	0	1	0.862903	0	1
MAPK9	MAPK9	gene	4.54301	0	0.220118	FALSE	0	0	6	0	1	0	8	0	1	0.86373	0	1
PHLPP2	PHLPP2	gene	4.56452	0	0.219081	FALSE	0	0	6	0	1	0	6	0	1	0.862903	0	1
PPARG	PPARG	gene	4.67204	0	0.214039	FALSE	0	0	6	0	1	0	26	0	1	0.858768	0	1
IGFBP1	IGFBP1	gene	4.82258	0	0.207358	FALSE	0	0	6	0	1	0	12	0	1	0.852978	0	1
SREBF2	SREBF2	gene	4.80108	0	0.208287	FALSE	0	0	6	0	1	0	14	0	1	0.853805	0	1
CTSS	CTSS	gene	4.58602	0	0.218054	FALSE	0	0	6	0	1	0	4	0	1	0.862076	0	1
NR1I2	NR1I2	gene	4.45699	0	0.224367	FALSE	0	0	6	0	1	0	16	0	1	0.867039	0	1
IKBKB	IKBKB	gene	4.67204	0	0.214039	FALSE	0	0	6	0	1	0	26	0	1	0.858768	0	1
WNT3A	WNT3A	gene	4.59677	0	0.217544	FALSE	0	0	6	0	1	0	3	0	1	0.861663	0	1
CFD	CFD	gene	4.54301	0	0.220118	FALSE	0	0	6	0	1	0	8	0	1	0.86373	0	1
NOS2	NOS2	gene	4.67204	0	0.214039	FALSE	0	0	6	0	1	0	26	0	1	0.858768	0	1
SIRT2	SIRT2	gene	4.45699	0	0.224367	FALSE	0	0	6	0	1	0	16	0	1	0.867039	0	1
MAPK8	MAPK8	gene	4.83333	0	0.206897	FALSE	0	0	6	0	1	0	11	0	1	0.852564	0	1
