# Supplementary material for: Mechanisms of Yinchen combined with Huangbai against Non-alcoholic fatty liver disease based on Network pharmacology, Molecular docking and Molecular Dynamics Simulations
Source: Research Square preprint supplement (doi:10.21203/rs.3.rs-7535069/v1), 2025-10-17
Supplement: Supplementary file 5 [file a9147fa2460072ae40469331.docx]

TABLE 4: Top 10 active compounds information of Drug-compound-disease-target(D-C-D-T) network.

| Active Compound | MOL ID | | Degree | Betweenness Centrality | Closeness Centrality | Drug |
| --- | --- | --- | --- | --- | --- | --- |
| [Genkwanin](https://old.tcmsp-e.com/molecule.php?qn=5573) | | MOL005573 | 26 | 0.25138 | 0.271929825 | Yinchen |
| rutaecarpine | | MOL002662 | 16 | 0.155187 | 0.288819876 | Huangbai |
| [beta-sitosterol](https://old.tcmsp-e.com/molecule.php?qn=358) | | MOL000358 | 14 | 0.135251 | 0.262711864 | Yinchen |
| [Demethoxycapillarisin](https://old.tcmsp-e.com/molecule.php?qn=8046) | | MOL008046 | 12 | 0.115083 | 0.261235955 | Yinchen |
| Artepillin A | | MOL008047 | 11 | 0.104911 | 0.260504202 | Yinchen |
| palmatine | | MOL000785 | 8 | 0.074048 | 0.281818182 | Huangbai |
| [capillarisin](https://old.tcmsp-e.com/molecule.php?qn=8043) | | MOL008043 | 8 | 0.074048 | 0.258333333 | Yinchen |
| Skimmianin | | MOL002663 | 8 | 0.074048 | 0.281818182 | Huangbai |
| Magnograndiolide | | MOL000622 | 6 | 0.053182 | 0.280120482 | Huangbai |
| Palmidin A | | MOL000762 | 6 | 0.053182 | 0.280120482 | Huangbai |
