# Supplementary material for: Mechanisms of Yinchen combined with Huangbai against Non-alcoholic fatty liver disease based on Network pharmacology, Molecular docking and Molecular Dynamics Simulations
Source: Research Square preprint supplement (doi:10.21203/rs.3.rs-7535069/v1), 2025-10-17
Supplement: Supplementary file 6 [file ac7ef0d0b51b935e1f3aa03a.xlsx]

## Sheet: GeneCards database
Gene Symbol	Description	Category	Gifts	GC Id	Relevance score	GeneCards Link
MIR122	MicroRNA 122	RNA Gene	24	GC18P058451	18.7839	https://www.genecards.org/cgi-bin/carddisp.pl?gene=MIR122
MIR10B	MicroRNA 10b	RNA Gene	23	GC02P176150	15.6528	https://www.genecards.org/cgi-bin/carddisp.pl?gene=MIR10B
NAFLD1	Fatty Liver Disease 1, Susceptiblity To	Genetic Locus	2	GC22U901005	15.5415	https://www.genecards.org/cgi-bin/carddisp.pl?gene=NAFLD1
NAFLD2	Fatty Liver Disease, Nonalcoholic, Susceptibility To, 2	Genetic Locus	2	GC11U901533	14.5052	https://www.genecards.org/cgi-bin/carddisp.pl?gene=NAFLD2
PNPLA3	Patatin Like Phospholipase Domain Containing 3	Protein Coding	44	GC22P043923	11.7114	https://www.genecards.org/cgi-bin/carddisp.pl?gene=PNPLA3
TM6SF2	Transmembrane 6 Superfamily Member 2	Protein Coding	33	GC19M019264	7.9684	https://www.genecards.org/cgi-bin/carddisp.pl?gene=TM6SF2
ADIPOQ	Adiponectin, C1Q And Collagen Domain Containing	Protein Coding	48	GC03P186842	7.15808	https://www.genecards.org/cgi-bin/carddisp.pl?gene=ADIPOQ
INS	Insulin	Protein Coding	50	GC11M002159	6.6141	https://www.genecards.org/cgi-bin/carddisp.pl?gene=INS
GPT	Glutamic--Pyruvic Transaminase	Protein Coding	44	GC08P144502	6.50532	https://www.genecards.org/cgi-bin/carddisp.pl?gene=GPT
PPARG	Peroxisome Proliferator Activated Receptor Gamma	Protein Coding	55	GC03P012287	6.46663	https://www.genecards.org/cgi-bin/carddisp.pl?gene=PPARG
TNF	Tumor Necrosis Factor	Protein Coding	54	GC06P087731	6.39213	https://www.genecards.org/cgi-bin/carddisp.pl?gene=TNF
LEP	Leptin	Protein Coding	49	GC07P128241	5.95931	https://www.genecards.org/cgi-bin/carddisp.pl?gene=LEP
PPARA	Peroxisome Proliferator Activated Receptor Alpha	Protein Coding	49	GC22P046150	5.85944	https://www.genecards.org/cgi-bin/carddisp.pl?gene=PPARA
MTTP	Microsomal Triglyceride Transfer Protein	Protein Coding	46	GC04P099563	5.74008	https://www.genecards.org/cgi-bin/carddisp.pl?gene=MTTP
RETN	Resistin	Protein Coding	45	GC19P007669	5.59199	https://www.genecards.org/cgi-bin/carddisp.pl?gene=RETN
PPARGC1A	PPARG Coactivator 1 Alpha	Protein Coding	48	GC04M023755	5.56845	https://www.genecards.org/cgi-bin/carddisp.pl?gene=PPARGC1A
FGF21	Fibroblast Growth Factor 21	Protein Coding	44	GC19P070140	5.54451	https://www.genecards.org/cgi-bin/carddisp.pl?gene=FGF21
IL6	Interleukin 6	Protein Coding	53	GC07P022725	5.54155	https://www.genecards.org/cgi-bin/carddisp.pl?gene=IL6
APOC3	Apolipoprotein C3	Protein Coding	48	GC11P116829	5.44869	https://www.genecards.org/cgi-bin/carddisp.pl?gene=APOC3
FASN	Fatty Acid Synthase	Protein Coding	51	GC17M082078	5.43355	https://www.genecards.org/cgi-bin/carddisp.pl?gene=FASN
AHSG	Alpha 2-HS Glycoprotein	Protein Coding	46	GC03P186632	5.42618	https://www.genecards.org/cgi-bin/carddisp.pl?gene=AHSG
IRS1	Insulin Receptor Substrate 1	Protein Coding	49	GC02M226731	5.41173	https://www.genecards.org/cgi-bin/carddisp.pl?gene=IRS1
IGF1	Insulin Like Growth Factor 1	Protein Coding	50	GC12M102395	5.40249	https://www.genecards.org/cgi-bin/carddisp.pl?gene=IGF1
SREBF1	Sterol Regulatory Element Binding Transcription Factor 1	Protein Coding	48	GC17M017810	5.38396	https://www.genecards.org/cgi-bin/carddisp.pl?gene=SREBF1
HSD17B13	Hydroxysteroid 17-Beta Dehydrogenase 13	Protein Coding	41	GC04M087303	5.31419	https://www.genecards.org/cgi-bin/carddisp.pl?gene=HSD17B13
TLR4	Toll Like Receptor 4	Protein Coding	54	GC09P117704	5.26517	https://www.genecards.org/cgi-bin/carddisp.pl?gene=TLR4
HFE	Homeostatic Iron Regulator	Protein Coding	48	GC06P026087	5.25991	https://www.genecards.org/cgi-bin/carddisp.pl?gene=HFE
LEPR	Leptin Receptor	Protein Coding	53	GC01P065421	5.1737	https://www.genecards.org/cgi-bin/carddisp.pl?gene=LEPR
CYP2E1	Cytochrome P450 Family 2 Subfamily E Member 1	Protein Coding	47	GC10P133520	5.1737	https://www.genecards.org/cgi-bin/carddisp.pl?gene=CYP2E1
MIR34A	MicroRNA 34a	RNA Gene	25	GC01M009151	5.11908	https://www.genecards.org/cgi-bin/carddisp.pl?gene=MIR34A
FGF19	Fibroblast Growth Factor 19	Protein Coding	45	GC11M097243	5.09457	https://www.genecards.org/cgi-bin/carddisp.pl?gene=FGF19
NR1H4	Nuclear Receptor Subfamily 1 Group H Member 4	Protein Coding	50	GC12P100473	5.08291	https://www.genecards.org/cgi-bin/carddisp.pl?gene=NR1H4
RBP4	Retinol Binding Protein 4	Protein Coding	48	GC10M093591	5.07951	https://www.genecards.org/cgi-bin/carddisp.pl?gene=RBP4
SREBF2	Sterol Regulatory Element Binding Transcription Factor 2	Protein Coding	44	GC22P041833	5.03435	https://www.genecards.org/cgi-bin/carddisp.pl?gene=SREBF2
APOE	Apolipoprotein E	Protein Coding	53	GC19P069967	5.02536	https://www.genecards.org/cgi-bin/carddisp.pl?gene=APOE
KRT18	Keratin 18	Protein Coding	51	GC12P052948	4.93066	https://www.genecards.org/cgi-bin/carddisp.pl?gene=KRT18
MLXIPL	MLX Interacting Protein Like	Protein Coding	45	GC07M073593	4.87475	https://www.genecards.org/cgi-bin/carddisp.pl?gene=MLXIPL
MIR21	MicroRNA 21	RNA Gene	26	GC17P059872	4.78987	https://www.genecards.org/cgi-bin/carddisp.pl?gene=MIR21
MIR140	MicroRNA 140	RNA Gene	26	GC16P069934	4.74894	https://www.genecards.org/cgi-bin/carddisp.pl?gene=MIR140
CRP	C-Reactive Protein	Protein Coding	48	GC01M159728	4.71968	https://www.genecards.org/cgi-bin/carddisp.pl?gene=CRP
APOB	Apolipoprotein B	Protein Coding	50	GC02M020956	4.70077	https://www.genecards.org/cgi-bin/carddisp.pl?gene=APOB
GGT1	Gamma-Glutamyltransferase 1	Protein Coding	52	GC22P024583	4.69578	https://www.genecards.org/cgi-bin/carddisp.pl?gene=GGT1
GCG	Glucagon	Protein Coding	44	GC02M162142	4.65439	https://www.genecards.org/cgi-bin/carddisp.pl?gene=GCG
ALMS1	ALMS1 Centrosome And Basal Body Associated Protein	Protein Coding	44	GC02P073385	4.65187	https://www.genecards.org/cgi-bin/carddisp.pl?gene=ALMS1
MIR29A	MicroRNA 29a	RNA Gene	23	GC07M130876	4.63629	https://www.genecards.org/cgi-bin/carddisp.pl?gene=MIR29A
SIRT1	Sirtuin 1	Protein Coding	52	GC10P067884	4.62841	https://www.genecards.org/cgi-bin/carddisp.pl?gene=SIRT1
MBOAT7	Membrane Bound O-Acyltransferase Domain Containing 7	Protein Coding	43	GC19M054173	4.57351	https://www.genecards.org/cgi-bin/carddisp.pl?gene=MBOAT7
PEMT	Phosphatidylethanolamine N-Methyltransferase	Protein Coding	42	GC17M017576	4.42835	https://www.genecards.org/cgi-bin/carddisp.pl?gene=PEMT
NR1H3	Nuclear Receptor Subfamily 1 Group H Member 3	Protein Coding	48	GC11P047248	4.40634	https://www.genecards.org/cgi-bin/carddisp.pl?gene=NR1H3
PRMT7	Protein Arginine Methyltransferase 7	Protein Coding	47	GC16P068517	4.38971	https://www.genecards.org/cgi-bin/carddisp.pl?gene=PRMT7
ATG7	Autophagy Related 7	Protein Coding	45	GC03P012714	4.38971	https://www.genecards.org/cgi-bin/carddisp.pl?gene=ATG7
SERPINE1	Serpin Family E Member 1	Protein Coding	52	GC07P101127	4.37614	https://www.genecards.org/cgi-bin/carddisp.pl?gene=SERPINE1
FABP4	Fatty Acid Binding Protein 4	Protein Coding	47	GC08M081478	4.31347	https://www.genecards.org/cgi-bin/carddisp.pl?gene=FABP4
ANGPTL8	Angiopoietin Like 8	Protein Coding	33	GC19P011238	4.30369	https://www.genecards.org/cgi-bin/carddisp.pl?gene=ANGPTL8
CD36	CD36 Molecule	Protein Coding	52	GC07P080369	4.29336	https://www.genecards.org/cgi-bin/carddisp.pl?gene=CD36
DPP4	Dipeptidyl Peptidase 4	Protein Coding	53	GC02M161992	4.28307	https://www.genecards.org/cgi-bin/carddisp.pl?gene=DPP4
ACACA	Acetyl-CoA Carboxylase Alpha	Protein Coding	50	GC17M037084	4.28307	https://www.genecards.org/cgi-bin/carddisp.pl?gene=ACACA
GCKR	Glucokinase Regulator	Protein Coding	44	GC02P027496	4.23668	https://www.genecards.org/cgi-bin/carddisp.pl?gene=GCKR
ACOX1	Acyl-CoA Oxidase 1	Protein Coding	48	GC17M075941	4.22906	https://www.genecards.org/cgi-bin/carddisp.pl?gene=ACOX1
SERPINA1	Serpin Family A Member 1	Protein Coding	51	GC14M094376	4.19017	https://www.genecards.org/cgi-bin/carddisp.pl?gene=SERPINA1
LIPA	Lipase A, Lysosomal Acid Type	Protein Coding	51	GC10M089213	4.15079	https://www.genecards.org/cgi-bin/carddisp.pl?gene=LIPA
RARRES2	Retinoic Acid Receptor Responder 2	Protein Coding	42	GC07M150333	4.08232	https://www.genecards.org/cgi-bin/carddisp.pl?gene=RARRES2
MIR192	MicroRNA 192	RNA Gene	23	GC11M064891	4.05853	https://www.genecards.org/cgi-bin/carddisp.pl?gene=MIR192
UCP2	Uncoupling Protein 2	Protein Coding	49	GC11M073974	4.04569	https://www.genecards.org/cgi-bin/carddisp.pl?gene=UCP2
MIR17	MicroRNA 17	RNA Gene	23	GC13P091350	4.03504	https://www.genecards.org/cgi-bin/carddisp.pl?gene=MIR17
MAP3K5	Mitogen-Activated Protein Kinase Kinase Kinase 5	Protein Coding	50	GC06M136557	4.02599	https://www.genecards.org/cgi-bin/carddisp.pl?gene=MAP3K5
SCD	Stearoyl-CoA Desaturase	Protein Coding	52	GC10P100347	4.0087	https://www.genecards.org/cgi-bin/carddisp.pl?gene=SCD
PCSK9	Proprotein Convertase Subtilisin/Kexin Type 9	Protein Coding	54	GC01P055039	3.9871	https://www.genecards.org/cgi-bin/carddisp.pl?gene=PCSK9
MAPK8	Mitogen-Activated Protein Kinase 8	Protein Coding	52	GC10P048306	3.97158	https://www.genecards.org/cgi-bin/carddisp.pl?gene=MAPK8
MIR26A1	MicroRNA 26a-1	RNA Gene	23	GC03P037969	3.95172	https://www.genecards.org/cgi-bin/carddisp.pl?gene=MIR26A1
MIR155	MicroRNA 155	RNA Gene	23	GC21P025573	3.88201	https://www.genecards.org/cgi-bin/carddisp.pl?gene=MIR155
SOD2	Superoxide Dismutase 2	Protein Coding	51	GC06M159669	3.86342	https://www.genecards.org/cgi-bin/carddisp.pl?gene=SOD2
MIR212	MicroRNA 212	RNA Gene	23	GC17M002050	3.85433	https://www.genecards.org/cgi-bin/carddisp.pl?gene=MIR212
CXCL10	C-X-C Motif Chemokine Ligand 10	Protein Coding	47	GC04M076021	3.83783	https://www.genecards.org/cgi-bin/carddisp.pl?gene=CXCL10
LPL	Lipoprotein Lipase	Protein Coding	52	GC08P019901	3.82456	https://www.genecards.org/cgi-bin/carddisp.pl?gene=LPL
SPP1	Secreted Phosphoprotein 1	Protein Coding	49	GC04P087975	3.82456	https://www.genecards.org/cgi-bin/carddisp.pl?gene=SPP1
IL1B	Interleukin 1 Beta	Protein Coding	50	GC02M112829	3.82292	https://www.genecards.org/cgi-bin/carddisp.pl?gene=IL1B
IL10	Interleukin 10	Protein Coding	50	GC01M206767	3.81093	https://www.genecards.org/cgi-bin/carddisp.pl?gene=IL10
INSR	Insulin Receptor	Protein Coding	56	GC19M007112	3.78565	https://www.genecards.org/cgi-bin/carddisp.pl?gene=INSR
KLB	Klotho Beta	Protein Coding	44	GC04P039408	3.78248	https://www.genecards.org/cgi-bin/carddisp.pl?gene=KLB
MIR130A	MicroRNA 130a	RNA Gene	23	GC11P057641	3.71965	https://www.genecards.org/cgi-bin/carddisp.pl?gene=MIR130A
MIR200C	MicroRNA 200c	RNA Gene	26	GC12P022384	3.70236	https://www.genecards.org/cgi-bin/carddisp.pl?gene=MIR200C
MIR132	MicroRNA 132	RNA Gene	23	GC17M002049	3.70236	https://www.genecards.org/cgi-bin/carddisp.pl?gene=MIR132
SIRT4	Sirtuin 4	Protein Coding	45	GC12P120291	3.64512	https://www.genecards.org/cgi-bin/carddisp.pl?gene=SIRT4
MIR30A	MicroRNA 30a	RNA Gene	22	GC06M071403	3.64512	https://www.genecards.org/cgi-bin/carddisp.pl?gene=MIR30A
NAMPT	Nicotinamide Phosphoribosyltransferase	Protein Coding	51	GC07M106248	3.64171	https://www.genecards.org/cgi-bin/carddisp.pl?gene=NAMPT
IRS2	Insulin Receptor Substrate 2	Protein Coding	47	GC13M109752	3.59305	https://www.genecards.org/cgi-bin/carddisp.pl?gene=IRS2
IL18	Interleukin 18	Protein Coding	47	GC11M112143	3.57567	https://www.genecards.org/cgi-bin/carddisp.pl?gene=IL18
MIR22	MicroRNA 22	RNA Gene	23	GC17M001713	3.57567	https://www.genecards.org/cgi-bin/carddisp.pl?gene=MIR22
MIR33A	MicroRNA 33a	RNA Gene	21	GC22P041900	3.51658	https://www.genecards.org/cgi-bin/carddisp.pl?gene=MIR33A
MIRLET7C	MicroRNA Let-7c	RNA Gene	25	GC21P016551	3.47931	https://www.genecards.org/cgi-bin/carddisp.pl?gene=MIRLET7C
MIR126	MicroRNA 126	RNA Gene	24	GC09P136670	3.47931	https://www.genecards.org/cgi-bin/carddisp.pl?gene=MIR126
MIRLET7D	MicroRNA Let-7d	RNA Gene	24	GC09P094178	3.47931	https://www.genecards.org/cgi-bin/carddisp.pl?gene=MIRLET7D
MIR203A	MicroRNA 203a	RNA Gene	23	GC14P110181	3.47931	https://www.genecards.org/cgi-bin/carddisp.pl?gene=MIR203A
MIRLET7E	MicroRNA Let-7e	RNA Gene	23	GC19P070320	3.47931	https://www.genecards.org/cgi-bin/carddisp.pl?gene=MIRLET7E
MIR107	MicroRNA 107	RNA Gene	22	GC10M089600	3.47931	https://www.genecards.org/cgi-bin/carddisp.pl?gene=MIR107
MIR154	MicroRNA 154	RNA Gene	22	GC14P110426	3.47931	https://www.genecards.org/cgi-bin/carddisp.pl?gene=MIR154
MIR16-1	MicroRNA 16-1	RNA Gene	22	GC13M050048	3.47931	https://www.genecards.org/cgi-bin/carddisp.pl?gene=MIR16-1
MIR27B	MicroRNA 27b	RNA Gene	22	GC09P095097	3.47931	https://www.genecards.org/cgi-bin/carddisp.pl?gene=MIR27B
MIR31	MicroRNA 31	RNA Gene	22	GC09M021793	3.47931	https://www.genecards.org/cgi-bin/carddisp.pl?gene=MIR31
MIR151A	MicroRNA 151a	RNA Gene	21	GC08M140760	3.47931	https://www.genecards.org/cgi-bin/carddisp.pl?gene=MIR151A
MIR183	MicroRNA 183	RNA Gene	21	GC07M129839	3.47931	https://www.genecards.org/cgi-bin/carddisp.pl?gene=MIR183
MIR30D	MicroRNA 30d	RNA Gene	21	GC08M134804	3.47931	https://www.genecards.org/cgi-bin/carddisp.pl?gene=MIR30D
MIR187	MicroRNA 187	RNA Gene	20	GC18M035904	3.47931	https://www.genecards.org/cgi-bin/carddisp.pl?gene=MIR187
MIR29C	MicroRNA 29c	RNA Gene	20	GC01M207802	3.47931	https://www.genecards.org/cgi-bin/carddisp.pl?gene=MIR29C
MIR95	MicroRNA 95	RNA Gene	19	GC04M008007	3.47931	https://www.genecards.org/cgi-bin/carddisp.pl?gene=MIR95
FNDC5	Fibronectin Type III Domain Containing 5	Protein Coding	40	GC01M033216	3.34132	https://www.genecards.org/cgi-bin/carddisp.pl?gene=FNDC5
TP53	Tumor Protein P53	Protein Coding	55	GC17M007661	3.29919	https://www.genecards.org/cgi-bin/carddisp.pl?gene=TP53
HP	Haptoglobin	Protein Coding	48	GC16P072191	3.26564	https://www.genecards.org/cgi-bin/carddisp.pl?gene=HP
MIR27A	MicroRNA 27a	RNA Gene	25	GC19M014544	3.23009	https://www.genecards.org/cgi-bin/carddisp.pl?gene=MIR27A
HMOX1	Heme Oxygenase 1	Protein Coding	55	GC22P035380	3.21773	https://www.genecards.org/cgi-bin/carddisp.pl?gene=HMOX1
FABP1	Fatty Acid Binding Protein 1	Protein Coding	45	GC02M088122	3.21773	https://www.genecards.org/cgi-bin/carddisp.pl?gene=FABP1
APOA1	Apolipoprotein A1	Protein Coding	52	GC11M116835	3.20509	https://www.genecards.org/cgi-bin/carddisp.pl?gene=APOA1
HIF1A	Hypoxia Inducible Factor 1 Subunit Alpha	Protein Coding	51	GC14P061695	3.19214	https://www.genecards.org/cgi-bin/carddisp.pl?gene=HIF1A
SIRT3	Sirtuin 3	Protein Coding	50	GC11M000215	3.17886	https://www.genecards.org/cgi-bin/carddisp.pl?gene=SIRT3
TIMP1	TIMP Metallopeptidase Inhibitor 1	Protein Coding	47	GC0XP047647	3.17886	https://www.genecards.org/cgi-bin/carddisp.pl?gene=TIMP1
PLIN2	Perilipin 2	Protein Coding	44	GC09M019173	3.15122	https://www.genecards.org/cgi-bin/carddisp.pl?gene=PLIN2
NFE2L2	NFE2 Like BZIP Transcription Factor 2	Protein Coding	53	GC02M177227	3.13679	https://www.genecards.org/cgi-bin/carddisp.pl?gene=NFE2L2
CPT1A	Carnitine Palmitoyltransferase 1A	Protein Coding	51	GC11M068754	3.12189	https://www.genecards.org/cgi-bin/carddisp.pl?gene=CPT1A
SIRT6	Sirtuin 6	Protein Coding	47	GC19M004174	3.12189	https://www.genecards.org/cgi-bin/carddisp.pl?gene=SIRT6
LNCARSR	LncRNA Regulator Of Akt Signaling Associated With HCC And RCC	RNA Gene	15	GC09M079507	3.12189	https://www.genecards.org/cgi-bin/carddisp.pl?gene=LNCARSR
DGAT1	Diacylglycerol O-Acyltransferase 1	Protein Coding	50	GC08M144316	3.09054	https://www.genecards.org/cgi-bin/carddisp.pl?gene=DGAT1
ADIPOR1	Adiponectin Receptor 1	Protein Coding	47	GC01M202940	3.09054	https://www.genecards.org/cgi-bin/carddisp.pl?gene=ADIPOR1
HMGCR	3-Hydroxy-3-Methylglutaryl-CoA Reductase	Protein Coding	50	GC05P075336	3.07396	https://www.genecards.org/cgi-bin/carddisp.pl?gene=HMGCR
MIR200A	MicroRNA 200a	RNA Gene	22	GC01P004110	3.07396	https://www.genecards.org/cgi-bin/carddisp.pl?gene=MIR200A
CXCL8	C-X-C Motif Chemokine Ligand 8	Protein Coding	44	GC04P073740	3.05667	https://www.genecards.org/cgi-bin/carddisp.pl?gene=CXCL8
MIR378A	MicroRNA 378a	RNA Gene	23	GC05P149732	3.05667	https://www.genecards.org/cgi-bin/carddisp.pl?gene=MIR378A
ALDH2	Aldehyde Dehydrogenase 2 Family Member	Protein Coding	53	GC12P111766	3.01954	https://www.genecards.org/cgi-bin/carddisp.pl?gene=ALDH2
ABHD5	Abhydrolase Domain Containing 5, Lysophosphatidic Acid Acyltransferase	Protein Coding	48	GC03P043707	3.01954	https://www.genecards.org/cgi-bin/carddisp.pl?gene=ABHD5
SIRT5	Sirtuin 5	Protein Coding	48	GC06P013574	2.99943	https://www.genecards.org/cgi-bin/carddisp.pl?gene=SIRT5
MIR15B	MicroRNA 15b	RNA Gene	21	GC03P160404	2.96229	https://www.genecards.org/cgi-bin/carddisp.pl?gene=MIR15B
CETP	Cholesteryl Ester Transfer Protein	Protein Coding	49	GC16P056961	2.955	https://www.genecards.org/cgi-bin/carddisp.pl?gene=CETP
MIR451A	MicroRNA 451a	RNA Gene	20	GC17M028861	2.955	https://www.genecards.org/cgi-bin/carddisp.pl?gene=MIR451A
BCL2	BCL2 Apoptosis Regulator	Protein Coding	53	GC18M063123	2.92998	https://www.genecards.org/cgi-bin/carddisp.pl?gene=BCL2
ABCB11	ATP Binding Cassette Subfamily B Member 11	Protein Coding	49	GC02M168922	2.92998	https://www.genecards.org/cgi-bin/carddisp.pl?gene=ABCB11
SCARB1	Scavenger Receptor Class B Member 1	Protein Coding	50	GC12M124776	2.9023	https://www.genecards.org/cgi-bin/carddisp.pl?gene=SCARB1
DGAT2	Diacylglycerol O-Acyltransferase 2	Protein Coding	45	GC11P075759	2.9023	https://www.genecards.org/cgi-bin/carddisp.pl?gene=DGAT2
MIR200B	MicroRNA 200b	RNA Gene	23	GC01P001167	2.9023	https://www.genecards.org/cgi-bin/carddisp.pl?gene=MIR200B
MIR429	MicroRNA 429	RNA Gene	22	GC01P004111	2.9023	https://www.genecards.org/cgi-bin/carddisp.pl?gene=MIR429
MALAT1	Metastasis Associated Lung Adenocarcinoma Transcript 1	RNA Gene	26	GC11P070433	2.88658	https://www.genecards.org/cgi-bin/carddisp.pl?gene=MALAT1
SLC10A1	Solute Carrier Family 10 Member 1	Protein Coding	46	GC14M069775	2.87089	https://www.genecards.org/cgi-bin/carddisp.pl?gene=SLC10A1
MSR1	Macrophage Scavenger Receptor 1	Protein Coding	48	GC08M016107	2.78506	https://www.genecards.org/cgi-bin/carddisp.pl?gene=MSR1
LIVAR	Liver Cell Viability Associated LncRNA	RNA Gene	13	GC18M070336	2.66781	https://www.genecards.org/cgi-bin/carddisp.pl?gene=LIVAR
FAS	Fas Cell Surface Death Receptor	Protein Coding	53	GC10P093591	2.50382	https://www.genecards.org/cgi-bin/carddisp.pl?gene=FAS
CCL2	C-C Motif Chemokine Ligand 2	Protein Coding	51	GC17P034255	2.4898	https://www.genecards.org/cgi-bin/carddisp.pl?gene=CCL2
IL1A	Interleukin 1 Alpha	Protein Coding	47	GC02M112773	2.46048	https://www.genecards.org/cgi-bin/carddisp.pl?gene=IL1A
MIR9-1	MicroRNA 9-1	RNA Gene	22	GC01M156420	2.33801	https://www.genecards.org/cgi-bin/carddisp.pl?gene=MIR9-1
DDIT3	DNA Damage Inducible Transcript 3	Protein Coding	48	GC12M057516	2.3166	https://www.genecards.org/cgi-bin/carddisp.pl?gene=DDIT3
ATF4	Activating Transcription Factor 4	Protein Coding	47	GC22P039519	2.3166	https://www.genecards.org/cgi-bin/carddisp.pl?gene=ATF4
MIR181B1	MicroRNA 181b-1	RNA Gene	22	GC01M198858	2.3166	https://www.genecards.org/cgi-bin/carddisp.pl?gene=MIR181B1
MIR142	MicroRNA 142	RNA Gene	23	GC17M058331	2.29358	https://www.genecards.org/cgi-bin/carddisp.pl?gene=MIR142
VCAM1	Vascular Cell Adhesion Molecule 1	Protein Coding	48	GC01P100719	2.26856	https://www.genecards.org/cgi-bin/carddisp.pl?gene=VCAM1
XBP1	X-Box Binding Protein 1	Protein Coding	47	GC22M028794	2.26856	https://www.genecards.org/cgi-bin/carddisp.pl?gene=XBP1
AFP	Alpha Fetoprotein	Protein Coding	48	GC04P073431	2.24089	https://www.genecards.org/cgi-bin/carddisp.pl?gene=AFP
MIR33B	MicroRNA 33b	RNA Gene	21	GC17M017813	2.17221	https://www.genecards.org/cgi-bin/carddisp.pl?gene=MIR33B
MTHFR	Methylenetetrahydrofolate Reductase	Protein Coding	50	GC01M011785	2.16875	https://www.genecards.org/cgi-bin/carddisp.pl?gene=MTHFR
EIF2S1	Eukaryotic Translation Initiation Factor 2 Subunit Alpha	Protein Coding	46	GC14P067359	2.0064	https://www.genecards.org/cgi-bin/carddisp.pl?gene=EIF2S1
SLC17A5	Solute Carrier Family 17 Member 5	Protein Coding	47	GC06M073593	1.99271	https://www.genecards.org/cgi-bin/carddisp.pl?gene=SLC17A5
SHBG	Sex Hormone Binding Globulin	Protein Coding	44	GC17P007613	1.74218	https://www.genecards.org/cgi-bin/carddisp.pl?gene=SHBG
CTNNB1	Catenin Beta 1	Protein Coding	56	GC03P041236	1.71619	https://www.genecards.org/cgi-bin/carddisp.pl?gene=CTNNB1
AGTR1	Angiotensin II Receptor Type 1	Protein Coding	54	GC03P148697	1.50725	https://www.genecards.org/cgi-bin/carddisp.pl?gene=AGTR1
SELENOP	Selenoprotein P	Protein Coding	38	GC05M042800	1.38212	https://www.genecards.org/cgi-bin/carddisp.pl?gene=SELENOP
AGT	Angiotensinogen	Protein Coding	52	GC01M230702	1.37787	https://www.genecards.org/cgi-bin/carddisp.pl?gene=AGT
UGT1A1	UDP Glucuronosyltransferase Family 1 Member A1	Protein Coding	52	GC02P233760	1.35885	https://www.genecards.org/cgi-bin/carddisp.pl?gene=UGT1A1
APOA5	Apolipoprotein A5	Protein Coding	47	GC11M116789	1.35885	https://www.genecards.org/cgi-bin/carddisp.pl?gene=APOA5
NLRP3	NLR Family Pyrin Domain Containing 3	Protein Coding	50	GC01P247415	1.35183	https://www.genecards.org/cgi-bin/carddisp.pl?gene=NLRP3
GSTT1	Glutathione S-Transferase Theta 1	Protein Coding	34	GC22Mi00270	1.33931	https://www.genecards.org/cgi-bin/carddisp.pl?gene=GSTT1
NR1H2	Nuclear Receptor Subfamily 1 Group H Member 2	Protein Coding	49	GC19P050329	1.3192	https://www.genecards.org/cgi-bin/carddisp.pl?gene=NR1H2
LCN2	Lipocalin 2	Protein Coding	48	GC09P128149	1.3192	https://www.genecards.org/cgi-bin/carddisp.pl?gene=LCN2
EZH2	Enhancer Of Zeste 2 Polycomb Repressive Complex 2 Subunit	Protein Coding	56	GC07M148807	1.302	https://www.genecards.org/cgi-bin/carddisp.pl?gene=EZH2
ACLY	ATP Citrate Lyase	Protein Coding	50	GC17M041866	1.302	https://www.genecards.org/cgi-bin/carddisp.pl?gene=ACLY
NRG4	Neuregulin 4	Protein Coding	45	GC15M075935	1.29847	https://www.genecards.org/cgi-bin/carddisp.pl?gene=NRG4
GSTP1	Glutathione S-Transferase Pi 1	Protein Coding	53	GC11P067583	1.26608	https://www.genecards.org/cgi-bin/carddisp.pl?gene=GSTP1
PTX3	Pentraxin 3	Protein Coding	45	GC03P157436	1.26608	https://www.genecards.org/cgi-bin/carddisp.pl?gene=PTX3
NRG1	Neuregulin 1	Protein Coding	51	GC08P031639	1.26487	https://www.genecards.org/cgi-bin/carddisp.pl?gene=NRG1
MTOR	Mechanistic Target Of Rapamycin Kinase	Protein Coding	56	GC01M011106	1.2549	https://www.genecards.org/cgi-bin/carddisp.pl?gene=MTOR
VDR	Vitamin D Receptor	Protein Coding	52	GC12M047841	1.24352	https://www.genecards.org/cgi-bin/carddisp.pl?gene=VDR
ALPP	Alkaline Phosphatase, Placental	Protein Coding	47	GC02P232378	1.24352	https://www.genecards.org/cgi-bin/carddisp.pl?gene=ALPP
TNFAIP3	TNF Alpha Induced Protein 3	Protein Coding	50	GC06P137866	1.22334	https://www.genecards.org/cgi-bin/carddisp.pl?gene=TNFAIP3
SLC25A47	Solute Carrier Family 25 Member 47	Protein Coding	37	GC14P100323	1.20033	https://www.genecards.org/cgi-bin/carddisp.pl?gene=SLC25A47
CD163	CD163 Molecule	Protein Coding	47	GC12M007923	1.18297	https://www.genecards.org/cgi-bin/carddisp.pl?gene=CD163
TF	Transferrin	Protein Coding	53	GC03P134678	1.15674	https://www.genecards.org/cgi-bin/carddisp.pl?gene=TF
THBS2	Thrombospondin 2	Protein Coding	48	GC06M169215	1.15674	https://www.genecards.org/cgi-bin/carddisp.pl?gene=THBS2
CLU	Clusterin	Protein Coding	50	GC08M027596	1.14311	https://www.genecards.org/cgi-bin/carddisp.pl?gene=CLU
LECT2	Leukocyte Cell Derived Chemotaxin 2	Protein Coding	40	GC05M135922	1.14311	https://www.genecards.org/cgi-bin/carddisp.pl?gene=LECT2
MIR20A	MicroRNA 20a	RNA Gene	23	GC13P091567	1.14311	https://www.genecards.org/cgi-bin/carddisp.pl?gene=MIR20A
GDF15	Growth Differentiation Factor 15	Protein Coding	45	GC19P069333	1.1291	https://www.genecards.org/cgi-bin/carddisp.pl?gene=GDF15
VIM	Vimentin	Protein Coding	53	GC10P017227	1.11466	https://www.genecards.org/cgi-bin/carddisp.pl?gene=VIM
CPS1	Carbamoyl-Phosphate Synthase 1	Protein Coding	51	GC02P210477	1.11466	https://www.genecards.org/cgi-bin/carddisp.pl?gene=CPS1
SLC27A5	Solute Carrier Family 27 Member 5	Protein Coding	44	GC19M058479	1.11466	https://www.genecards.org/cgi-bin/carddisp.pl?gene=SLC27A5
CP	Ceruloplasmin	Protein Coding	51	GC03M149162	1.09977	https://www.genecards.org/cgi-bin/carddisp.pl?gene=CP
ANGPTL3	Angiopoietin Like 3	Protein Coding	50	GC01P062597	1.09977	https://www.genecards.org/cgi-bin/carddisp.pl?gene=ANGPTL3
LGALS3	Galectin 3	Protein Coding	48	GC14P055124	1.09977	https://www.genecards.org/cgi-bin/carddisp.pl?gene=LGALS3
HSPA5	Heat Shock Protein Family A (Hsp70) Member 5	Protein Coding	51	GC09M125234	1.06842	https://www.genecards.org/cgi-bin/carddisp.pl?gene=HSPA5
RPL4	Ribosomal Protein L4	Protein Coding	44	GC15M066498	1.06842	https://www.genecards.org/cgi-bin/carddisp.pl?gene=RPL4
TNFRSF19	TNF Receptor Superfamily Member 19	Protein Coding	43	GC13P023570	1.06842	https://www.genecards.org/cgi-bin/carddisp.pl?gene=TNFRSF19
CCL20	C-C Motif Chemokine Ligand 20	Protein Coding	44	GC02P227846	1.03454	https://www.genecards.org/cgi-bin/carddisp.pl?gene=CCL20
NTS	Neurotensin	Protein Coding	43	GC12P085876	1.03454	https://www.genecards.org/cgi-bin/carddisp.pl?gene=NTS
IRGM	Immunity Related GTPase M	Protein Coding	40	GC05P150846	1.03454	https://www.genecards.org/cgi-bin/carddisp.pl?gene=IRGM
ZPR1	ZPR1 Zinc Finger	Protein Coding	40	GC11M116777	1.03454	https://www.genecards.org/cgi-bin/carddisp.pl?gene=ZPR1
IGF1R	Insulin Like Growth Factor 1 Receptor	Protein Coding	57	GC15P098648	1.01645	https://www.genecards.org/cgi-bin/carddisp.pl?gene=IGF1R
PTGS2	Prostaglandin-Endoperoxide Synthase 2	Protein Coding	51	GC01M186640	1.01645	https://www.genecards.org/cgi-bin/carddisp.pl?gene=PTGS2
LAP3	Leucine Aminopeptidase 3	Protein Coding	44	GC04P018747	1.01645	https://www.genecards.org/cgi-bin/carddisp.pl?gene=LAP3
TSKU	Tsukushi, Small Leucine Rich Proteoglycan	Protein Coding	38	GC11P076782	1.01645	https://www.genecards.org/cgi-bin/carddisp.pl?gene=TSKU
CAV1	Caveolin 1	Protein Coding	51	GC07P116524	0.99742	https://www.genecards.org/cgi-bin/carddisp.pl?gene=CAV1
OTC	Ornithine Transcarbamylase	Protein Coding	48	GC0XP038353	0.99742	https://www.genecards.org/cgi-bin/carddisp.pl?gene=OTC
LITAF	Lipopolysaccharide Induced TNF Factor	Protein Coding	46	GC16M011547	0.99742	https://www.genecards.org/cgi-bin/carddisp.pl?gene=LITAF
NPPB	Natriuretic Peptide B	Protein Coding	46	GC01M011858	0.99742	https://www.genecards.org/cgi-bin/carddisp.pl?gene=NPPB
HSD11B1	Hydroxysteroid 11-Beta Dehydrogenase 1	Protein Coding	54	GC01P209686	0.977305	https://www.genecards.org/cgi-bin/carddisp.pl?gene=HSD11B1
PNPLA2	Patatin Like Phospholipase Domain Containing 2	Protein Coding	47	GC11P001959	0.977305	https://www.genecards.org/cgi-bin/carddisp.pl?gene=PNPLA2
C1QTNF1	C1q And TNF Related 1	Protein Coding	43	GC17P079022	0.977305	https://www.genecards.org/cgi-bin/carddisp.pl?gene=C1QTNF1
MIR223	MicroRNA 223	RNA Gene	24	GC0XP066018	0.977305	https://www.genecards.org/cgi-bin/carddisp.pl?gene=MIR223
RTN4	Reticulon 4	Protein Coding	48	GC02M054934	0.955887	https://www.genecards.org/cgi-bin/carddisp.pl?gene=RTN4
SCTR	Secretin Receptor	Protein Coding	46	GC02M119439	0.955887	https://www.genecards.org/cgi-bin/carddisp.pl?gene=SCTR
TRIM28	Tripartite Motif Containing 28	Protein Coding	46	GC19P058544	0.955887	https://www.genecards.org/cgi-bin/carddisp.pl?gene=TRIM28
TRIM21	Tripartite Motif Containing 21	Protein Coding	45	GC11M004384	0.955887	https://www.genecards.org/cgi-bin/carddisp.pl?gene=TRIM21
COP1	COP1 E3 Ubiquitin Ligase	Protein Coding	43	GC01M175944	0.955887	https://www.genecards.org/cgi-bin/carddisp.pl?gene=COP1
DYNC2I2	Dynein 2 Intermediate Chain 2	Protein Coding	40	GC09M128636	0.955887	https://www.genecards.org/cgi-bin/carddisp.pl?gene=DYNC2I2
TRPC4AP	Transient Receptor Potential Cation Channel Subfamily C Member 4 Associated Protein	Protein Coding	40	GC20M035002	0.955887	https://www.genecards.org/cgi-bin/carddisp.pl?gene=TRPC4AP
SCT	Secretin	Protein Coding	38	GC11M000626	0.955887	https://www.genecards.org/cgi-bin/carddisp.pl?gene=SCT
SNX8	Sorting Nexin 8	Protein Coding	37	GC07M002251	0.955887	https://www.genecards.org/cgi-bin/carddisp.pl?gene=SNX8
MIR149	MicroRNA 149	RNA Gene	25	GC02P240456	0.955887	https://www.genecards.org/cgi-bin/carddisp.pl?gene=MIR149
MIR125B1	MicroRNA 125b-1	RNA Gene	23	GC11M122100	0.955887	https://www.genecards.org/cgi-bin/carddisp.pl?gene=MIR125B1
MIR590	MicroRNA 590	RNA Gene	22	GC07P074191	0.955887	https://www.genecards.org/cgi-bin/carddisp.pl?gene=MIR590
EGFR	Epidermal Growth Factor Receptor	Protein Coding	58	GC07P055019	0.932877	https://www.genecards.org/cgi-bin/carddisp.pl?gene=EGFR
CTSD	Cathepsin D	Protein Coding	55	GC11M001752	0.932877	https://www.genecards.org/cgi-bin/carddisp.pl?gene=CTSD
IL6ST	Interleukin 6 Cytokine Family Signal Transducer	Protein Coding	52	GC05M055935	0.932877	https://www.genecards.org/cgi-bin/carddisp.pl?gene=IL6ST
HDAC8	Histone Deacetylase 8	Protein Coding	50	GC0XM072329	0.932877	https://www.genecards.org/cgi-bin/carddisp.pl?gene=HDAC8
HSP90B1	Heat Shock Protein 90 Beta Family Member 1	Protein Coding	50	GC12P103930	0.932877	https://www.genecards.org/cgi-bin/carddisp.pl?gene=HSP90B1
ADAMTSL2	ADAMTS Like 2	Protein Coding	44	GC09P134395	0.932877	https://www.genecards.org/cgi-bin/carddisp.pl?gene=ADAMTSL2
DEPTOR	DEP Domain Containing MTOR Interacting Protein	Protein Coding	43	GC08P119873	0.932877	https://www.genecards.org/cgi-bin/carddisp.pl?gene=DEPTOR
ELAVL1	ELAV Like RNA Binding Protein 1	Protein Coding	43	GC19M007958	0.932877	https://www.genecards.org/cgi-bin/carddisp.pl?gene=ELAVL1
SYVN1	Synoviolin 1	Protein Coding	43	GC11M097035	0.932877	https://www.genecards.org/cgi-bin/carddisp.pl?gene=SYVN1
AGTRAP	Angiotensin II Receptor Associated Protein	Protein Coding	41	GC01P011736	0.932877	https://www.genecards.org/cgi-bin/carddisp.pl?gene=AGTRAP
TXNIP	Thioredoxin Interacting Protein	Protein Coding	41	GC01M145992	0.932877	https://www.genecards.org/cgi-bin/carddisp.pl?gene=TXNIP
ZHX2	Zinc Fingers And Homeoboxes 2	Protein Coding	40	GC08P122781	0.932877	https://www.genecards.org/cgi-bin/carddisp.pl?gene=ZHX2
PKLR	Pyruvate Kinase L/R	Protein Coding	50	GC01M155289	0.907855	https://www.genecards.org/cgi-bin/carddisp.pl?gene=PKLR
DNAJC15	DnaJ Heat Shock Protein Family (Hsp40) Member C15	Protein Coding	39	GC13P043023	0.907855	https://www.genecards.org/cgi-bin/carddisp.pl?gene=DNAJC15
SH3RF2	SH3 Domain Containing Ring Finger 2	Protein Coding	39	GC05P145936	0.907855	https://www.genecards.org/cgi-bin/carddisp.pl?gene=SH3RF2
HSPA8	Heat Shock Protein Family A (Hsp70) Member 8	Protein Coding	51	GC11M123057	0.880178	https://www.genecards.org/cgi-bin/carddisp.pl?gene=HSPA8
EGR1	Early Growth Response 1	Protein Coding	50	GC05P138465	0.880178	https://www.genecards.org/cgi-bin/carddisp.pl?gene=EGR1
FASLG	Fas Ligand	Protein Coding	50	GC01P172628	0.880178	https://www.genecards.org/cgi-bin/carddisp.pl?gene=FASLG
ATP5F1A	ATP Synthase F1 Subunit Alpha	Protein Coding	47	GC18M046081	0.880178	https://www.genecards.org/cgi-bin/carddisp.pl?gene=ATP5F1A
IGFBP1	Insulin Like Growth Factor Binding Protein 1	Protein Coding	46	GC07P047917	0.880178	https://www.genecards.org/cgi-bin/carddisp.pl?gene=IGFBP1
SLC13A5	Solute Carrier Family 13 Member 5	Protein Coding	46	GC17M006684	0.880178	https://www.genecards.org/cgi-bin/carddisp.pl?gene=SLC13A5
RACK1	Receptor For Activated C Kinase 1	Protein Coding	45	GC05M181873	0.880178	https://www.genecards.org/cgi-bin/carddisp.pl?gene=RACK1
CIDEC	Cell Death Inducing DFFA Like Effector C	Protein Coding	43	GC03M009866	0.880178	https://www.genecards.org/cgi-bin/carddisp.pl?gene=CIDEC
PACSIN2	Protein Kinase C And Casein Kinase Substrate In Neurons 2	Protein Coding	43	GC22M042835	0.880178	https://www.genecards.org/cgi-bin/carddisp.pl?gene=PACSIN2
LYPLAL1	Lysophospholipase Like 1	Protein Coding	40	GC01P219173	0.880178	https://www.genecards.org/cgi-bin/carddisp.pl?gene=LYPLAL1
TSC22D4	TSC22 Domain Family Member 4	Protein Coding	37	GC07M100463	0.880178	https://www.genecards.org/cgi-bin/carddisp.pl?gene=TSC22D4
SPDL1	Spindle Apparatus Coiled-Coil Protein 1	Protein Coding	36	GC05P169583	0.880178	https://www.genecards.org/cgi-bin/carddisp.pl?gene=SPDL1
MIR20B	MicroRNA 20b	RNA Gene	18	GC0XM134325	0.880178	https://www.genecards.org/cgi-bin/carddisp.pl?gene=MIR20B
NOS3	Nitric Oxide Synthase 3	Protein Coding	52	GC07P150990	0.848763	https://www.genecards.org/cgi-bin/carddisp.pl?gene=NOS3
TNFRSF1A	TNF Receptor Superfamily Member 1A	Protein Coding	52	GC12M006328	0.848763	https://www.genecards.org/cgi-bin/carddisp.pl?gene=TNFRSF1A
TNFRSF1B	TNF Receptor Superfamily Member 1B	Protein Coding	52	GC01P012272	0.848763	https://www.genecards.org/cgi-bin/carddisp.pl?gene=TNFRSF1B
BLVRA	Biliverdin Reductase A	Protein Coding	47	GC07P043758	0.848763	https://www.genecards.org/cgi-bin/carddisp.pl?gene=BLVRA
PCSK7	Proprotein Convertase Subtilisin/Kexin Type 7	Protein Coding	47	GC11M117199	0.848763	https://www.genecards.org/cgi-bin/carddisp.pl?gene=PCSK7
EIF6	Eukaryotic Translation Initiation Factor 6	Protein Coding	43	GC20M035278	0.848763	https://www.genecards.org/cgi-bin/carddisp.pl?gene=EIF6
CIDEA	Cell Death Inducing DFFA Like Effector A	Protein Coding	42	GC18P012254	0.848763	https://www.genecards.org/cgi-bin/carddisp.pl?gene=CIDEA
CIDEB	Cell Death Inducing DFFA Like Effector B	Protein Coding	37	GC14M024305	0.848763	https://www.genecards.org/cgi-bin/carddisp.pl?gene=CIDEB
SAMM50	SAMM50 Sorting And Assembly Machinery Component	Protein Coding	41	GC22P043955	0.84545	https://www.genecards.org/cgi-bin/carddisp.pl?gene=SAMM50
LEPQTL1	Leptin, Serum Levels Of	Genetic Locus	4	GC02U903086	0.837281	https://www.genecards.org/cgi-bin/carddisp.pl?gene=LEPQTL1
GHRL	Ghrelin And Obestatin Prepropeptide	Protein Coding	45	GC03M010285	0.8207	https://www.genecards.org/cgi-bin/carddisp.pl?gene=GHRL
YARS1	Tyrosyl-TRNA Synthetase 1	Protein Coding	45	GC01M032776	0.819109	https://www.genecards.org/cgi-bin/carddisp.pl?gene=YARS1
PDGFRB	Platelet Derived Growth Factor Receptor Beta	Protein Coding	56	GC05M150113	0.811498	https://www.genecards.org/cgi-bin/carddisp.pl?gene=PDGFRB
GREM1	Gremlin 1, DAN Family BMP Antagonist	Protein Coding	45	GC15P044385	0.811498	https://www.genecards.org/cgi-bin/carddisp.pl?gene=GREM1
ACOT12	Acyl-CoA Thioesterase 12	Protein Coding	40	GC05M081309	0.811498	https://www.genecards.org/cgi-bin/carddisp.pl?gene=ACOT12
IL6R	Interleukin 6 Receptor	Protein Coding	53	GC01P154405	0.762935	https://www.genecards.org/cgi-bin/carddisp.pl?gene=IL6R
PARVB	Parvin Beta	Protein Coding	42	GC22P043999	0.722733	https://www.genecards.org/cgi-bin/carddisp.pl?gene=PARVB
GPX1	Glutathione Peroxidase 1	Protein Coding	48	GC03M051406	0.683637	https://www.genecards.org/cgi-bin/carddisp.pl?gene=GPX1
NPY	Neuropeptide Y	Protein Coding	47	GC07P024290	0.673509	https://www.genecards.org/cgi-bin/carddisp.pl?gene=NPY
CYP3A4	Cytochrome P450 Family 3 Subfamily A Member 4	Protein Coding	52	GC07M099759	0.663225	https://www.genecards.org/cgi-bin/carddisp.pl?gene=CYP3A4
KLF6	KLF Transcription Factor 6	Protein Coding	45	GC10M003779	0.663225	https://www.genecards.org/cgi-bin/carddisp.pl?gene=KLF6
SERPINA12	Serpin Family A Member 12	Protein Coding	42	GC14M094487	0.663225	https://www.genecards.org/cgi-bin/carddisp.pl?gene=SERPINA12
WNT3A	Wnt Family Member 3A	Protein Coding	50	GC01P229424	0.645692	https://www.genecards.org/cgi-bin/carddisp.pl?gene=WNT3A
IL18BP	Interleukin 18 Binding Protein	Protein Coding	44	GC11P071998	0.645692	https://www.genecards.org/cgi-bin/carddisp.pl?gene=IL18BP
RB1CC1	RB1 Inducible Coiled-Coil 1	Protein Coding	44	GC08M052622	0.645692	https://www.genecards.org/cgi-bin/carddisp.pl?gene=RB1CC1
ICAM1	Intercellular Adhesion Molecule 1	Protein Coding	53	GC19P010638	0.642165	https://www.genecards.org/cgi-bin/carddisp.pl?gene=ICAM1
AGRP	Agouti Related Neuropeptide	Protein Coding	45	GC16M067482	0.642165	https://www.genecards.org/cgi-bin/carddisp.pl?gene=AGRP
GSTM1	Glutathione S-Transferase Mu 1	Protein Coding	44	GC01P109687	0.642165	https://www.genecards.org/cgi-bin/carddisp.pl?gene=GSTM1
TERT	Telomerase Reverse Transcriptase	Protein Coding	53	GC05M001253	0.631372	https://www.genecards.org/cgi-bin/carddisp.pl?gene=TERT
TCF7L2	Transcription Factor 7 Like 2	Protein Coding	49	GC10P112950	0.631372	https://www.genecards.org/cgi-bin/carddisp.pl?gene=TCF7L2
NEAT1	Nuclear Paraspeckle Assembly Transcript 1	RNA Gene	27	GC11P070383	0.631372	https://www.genecards.org/cgi-bin/carddisp.pl?gene=NEAT1
AGXT2	Alanine--Glyoxylate Aminotransferase 2	Protein Coding	43	GC05M034998	0.612254	https://www.genecards.org/cgi-bin/carddisp.pl?gene=AGXT2
FTL	Ferritin Light Chain	Protein Coding	48	GC19P048965	0.609212	https://www.genecards.org/cgi-bin/carddisp.pl?gene=FTL
ENPP1	Ectonucleotide Pyrophosphatase/Phosphodiesterase 1	Protein Coding	51	GC06P131808	0.597823	https://www.genecards.org/cgi-bin/carddisp.pl?gene=ENPP1
FETUB	Fetuin B	Protein Coding	39	GC03P186635	0.597823	https://www.genecards.org/cgi-bin/carddisp.pl?gene=FETUB
ALB	Albumin	Protein Coding	52	GC04P073397	0.586214	https://www.genecards.org/cgi-bin/carddisp.pl?gene=ALB
LIPC	Lipase C, Hepatic Type	Protein Coding	48	GC15P058410	0.57437	https://www.genecards.org/cgi-bin/carddisp.pl?gene=LIPC
GH1	Growth Hormone 1	Protein Coding	46	GC17M063917	0.562277	https://www.genecards.org/cgi-bin/carddisp.pl?gene=GH1
NCAN	Neurocan	Protein Coding	45	GC19P069340	0.562277	https://www.genecards.org/cgi-bin/carddisp.pl?gene=NCAN
CXCL16	C-X-C Motif Chemokine Ligand 16	Protein Coding	42	GC17M004733	0.549918	https://www.genecards.org/cgi-bin/carddisp.pl?gene=CXCL16
CD14	CD14 Molecule	Protein Coding	50	GC05M140631	0.537274	https://www.genecards.org/cgi-bin/carddisp.pl?gene=CD14
LIPE	Lipase E, Hormone Sensitive Type	Protein Coding	50	GC19M042401	0.537274	https://www.genecards.org/cgi-bin/carddisp.pl?gene=LIPE
SPINK1	Serine Peptidase Inhibitor Kazal Type 1	Protein Coding	44	GC05M147825	0.537274	https://www.genecards.org/cgi-bin/carddisp.pl?gene=SPINK1
TRIB1	Tribbles Pseudokinase 1	Protein Coding	41	GC08P125430	0.537274	https://www.genecards.org/cgi-bin/carddisp.pl?gene=TRIB1
PON1	Paraoxonase 1	Protein Coding	50	GC07M095297	0.524326	https://www.genecards.org/cgi-bin/carddisp.pl?gene=PON1
GPLD1	Glycosylphosphatidylinositol Specific Phospholipase D1	Protein Coding	45	GC06M024500	0.524326	https://www.genecards.org/cgi-bin/carddisp.pl?gene=GPLD1
STAT3	Signal Transducer And Activator Of Transcription 3	Protein Coding	56	GC17M042313	0.51105	https://www.genecards.org/cgi-bin/carddisp.pl?gene=STAT3
CYP2A6	Cytochrome P450 Family 2 Subfamily A Member 6	Protein Coding	50	GC19M040843	0.51105	https://www.genecards.org/cgi-bin/carddisp.pl?gene=CYP2A6
TLR1	Toll Like Receptor 1	Protein Coding	50	GC04M038793	0.51105	https://www.genecards.org/cgi-bin/carddisp.pl?gene=TLR1
DDX3X	DEAD-Box Helicase 3 X-Linked	Protein Coding	49	GC0XP041333	0.51105	https://www.genecards.org/cgi-bin/carddisp.pl?gene=DDX3X
STAR	Steroidogenic Acute Regulatory Protein	Protein Coding	47	GC08M038145	0.51105	https://www.genecards.org/cgi-bin/carddisp.pl?gene=STAR
HJV	Hemojuvelin BMP Co-Receptor	Protein Coding	45	GC01M147081	0.51105	https://www.genecards.org/cgi-bin/carddisp.pl?gene=HJV
LGALS3BP	Galectin 3 Binding Protein	Protein Coding	44	GC17M078971	0.51105	https://www.genecards.org/cgi-bin/carddisp.pl?gene=LGALS3BP
STEAP4	STEAP4 Metalloreductase	Protein Coding	43	GC07M088401	0.51105	https://www.genecards.org/cgi-bin/carddisp.pl?gene=STEAP4
HNF4A	Hepatocyte Nuclear Factor 4 Alpha	Protein Coding	52	GC20P044355	0.497419	https://www.genecards.org/cgi-bin/carddisp.pl?gene=HNF4A
CLOCK	Clock Circadian Regulator	Protein Coding	47	GC04M055427	0.497419	https://www.genecards.org/cgi-bin/carddisp.pl?gene=CLOCK
APLN	Apelin	Protein Coding	41	GC0XM129645	0.497419	https://www.genecards.org/cgi-bin/carddisp.pl?gene=APLN
MIR103A1	MicroRNA 103a-1	RNA Gene	19	GC05M168560	0.497419	https://www.genecards.org/cgi-bin/carddisp.pl?gene=MIR103A1
SOD1	Superoxide Dismutase 1	Protein Coding	56	GC21P031659	0.483404	https://www.genecards.org/cgi-bin/carddisp.pl?gene=SOD1
SHH	Sonic Hedgehog Signaling Molecule	Protein Coding	54	GC07M155799	0.483404	https://www.genecards.org/cgi-bin/carddisp.pl?gene=SHH
FTH1	Ferritin Heavy Chain 1	Protein Coding	52	GC11M061959	0.483404	https://www.genecards.org/cgi-bin/carddisp.pl?gene=FTH1
UCP3	Uncoupling Protein 3	Protein Coding	45	GC11M074000	0.483404	https://www.genecards.org/cgi-bin/carddisp.pl?gene=UCP3
COL13A1	Collagen Type XIII Alpha 1 Chain	Protein Coding	43	GC10P069801	0.483404	https://www.genecards.org/cgi-bin/carddisp.pl?gene=COL13A1
ESM1	Endothelial Cell Specific Molecule 1	Protein Coding	43	GC05M054977	0.483404	https://www.genecards.org/cgi-bin/carddisp.pl?gene=ESM1
AGER	Advanced Glycosylation End-Product Specific Receptor	Protein Coding	49	GC06M032180	0.468971	https://www.genecards.org/cgi-bin/carddisp.pl?gene=AGER
CYP2C9	Cytochrome P450 Family 2 Subfamily C Member 9	Protein Coding	49	GC10P094938	0.468971	https://www.genecards.org/cgi-bin/carddisp.pl?gene=CYP2C9
CYP2D6	Cytochrome P450 Family 2 Subfamily D Member 6	Protein Coding	49	GC22M042126	0.468971	https://www.genecards.org/cgi-bin/carddisp.pl?gene=CYP2D6
CYP1A2	Cytochrome P450 Family 1 Subfamily A Member 2	Protein Coding	48	GC15P074748	0.468971	https://www.genecards.org/cgi-bin/carddisp.pl?gene=CYP1A2
CYP2B6	Cytochrome P450 Family 2 Subfamily B Member 6	Protein Coding	48	GC19P040991	0.468971	https://www.genecards.org/cgi-bin/carddisp.pl?gene=CYP2B6
CYP2C19	Cytochrome P450 Family 2 Subfamily C Member 19	Protein Coding	48	GC10P094762	0.468971	https://www.genecards.org/cgi-bin/carddisp.pl?gene=CYP2C19
FTO	FTO Alpha-Ketoglutarate Dependent Dioxygenase	Protein Coding	48	GC16P053853	0.468971	https://www.genecards.org/cgi-bin/carddisp.pl?gene=FTO
GCLC	Glutamate-Cysteine Ligase Catalytic Subunit	Protein Coding	47	GC06M053497	0.468971	https://www.genecards.org/cgi-bin/carddisp.pl?gene=GCLC
ABCB7	ATP Binding Cassette Subfamily B Member 7	Protein Coding	46	GC0XM075053	0.468971	https://www.genecards.org/cgi-bin/carddisp.pl?gene=ABCB7
NPC1L1	NPC1 Like Intracellular Cholesterol Transporter 1	Protein Coding	46	GC07M044512	0.468971	https://www.genecards.org/cgi-bin/carddisp.pl?gene=NPC1L1
BGLAP	Bone Gamma-Carboxyglutamate Protein	Protein Coding	44	GC01P156242	0.468971	https://www.genecards.org/cgi-bin/carddisp.pl?gene=BGLAP
FGL1	Fibrinogen Like 1	Protein Coding	43	GC08M017864	0.468971	https://www.genecards.org/cgi-bin/carddisp.pl?gene=FGL1
MAP3K7	Mitogen-Activated Protein Kinase Kinase Kinase 7	Protein Coding	53	GC06M090513	0.454079	https://www.genecards.org/cgi-bin/carddisp.pl?gene=MAP3K7
LRP6	LDL Receptor Related Protein 6	Protein Coding	50	GC12M021873	0.454079	https://www.genecards.org/cgi-bin/carddisp.pl?gene=LRP6
GHR	Growth Hormone Receptor	Protein Coding	49	GC05P042429	0.454079	https://www.genecards.org/cgi-bin/carddisp.pl?gene=GHR
HAMP	Hepcidin Antimicrobial Peptide	Protein Coding	46	GC19P069623	0.454079	https://www.genecards.org/cgi-bin/carddisp.pl?gene=HAMP
ERLIN1	ER Lipid Raft Associated 1	Protein Coding	45	GC10M100150	0.454079	https://www.genecards.org/cgi-bin/carddisp.pl?gene=ERLIN1
ENHO	Energy Homeostasis Associated	Protein Coding	33	GC09M034516	0.454079	https://www.genecards.org/cgi-bin/carddisp.pl?gene=ENHO
PARP1	Poly(ADP-Ribose) Polymerase 1	Protein Coding	53	GC01M226360	0.438682	https://www.genecards.org/cgi-bin/carddisp.pl?gene=PARP1
COL3A1	Collagen Type III Alpha 1 Chain	Protein Coding	50	GC02P188974	0.438682	https://www.genecards.org/cgi-bin/carddisp.pl?gene=COL3A1
ACACB	Acetyl-CoA Carboxylase Beta	Protein Coding	48	GC12P109116	0.438682	https://www.genecards.org/cgi-bin/carddisp.pl?gene=ACACB
COPA	COPI Coat Complex Subunit Alpha	Protein Coding	45	GC01M160288	0.438682	https://www.genecards.org/cgi-bin/carddisp.pl?gene=COPA
S100A11	S100 Calcium Binding Protein A11	Protein Coding	45	GC01M152032	0.438682	https://www.genecards.org/cgi-bin/carddisp.pl?gene=S100A11
ADIPOR2	Adiponectin Receptor 2	Protein Coding	44	GC12P001670	0.438682	https://www.genecards.org/cgi-bin/carddisp.pl?gene=ADIPOR2
SRSF6	Serine And Arginine Rich Splicing Factor 6	Protein Coding	43	GC20P043457	0.438682	https://www.genecards.org/cgi-bin/carddisp.pl?gene=SRSF6
CCL19	C-C Motif Chemokine Ligand 19	Protein Coding	41	GC09M034703	0.438682	https://www.genecards.org/cgi-bin/carddisp.pl?gene=CCL19
TGFB1	Transforming Growth Factor Beta 1	Protein Coding	55	GC19M041301	0.422725	https://www.genecards.org/cgi-bin/carddisp.pl?gene=TGFB1
CHUK	Component Of Inhibitor Of Nuclear Factor Kappa B Kinase Complex	Protein Coding	54	GC10M100191	0.422725	https://www.genecards.org/cgi-bin/carddisp.pl?gene=CHUK
ADRB2	Adrenoceptor Beta 2	Protein Coding	52	GC05P148825	0.422725	https://www.genecards.org/cgi-bin/carddisp.pl?gene=ADRB2
F2	Coagulation Factor II, Thrombin	Protein Coding	52	GC11P046720	0.422725	https://www.genecards.org/cgi-bin/carddisp.pl?gene=F2
MIF	Macrophage Migration Inhibitory Factor	Protein Coding	50	GC22P023894	0.422725	https://www.genecards.org/cgi-bin/carddisp.pl?gene=MIF
APPL1	Adaptor Protein, Phosphotyrosine Interacting With PH Domain And Leucine Zipper 1	Protein Coding	47	GC03P057227	0.422725	https://www.genecards.org/cgi-bin/carddisp.pl?gene=APPL1
FDFT1	Farnesyl-Diphosphate Farnesyltransferase 1	Protein Coding	47	GC08P011795	0.422725	https://www.genecards.org/cgi-bin/carddisp.pl?gene=FDFT1
NR1I2	Nuclear Receptor Subfamily 1 Group I Member 2	Protein Coding	47	GC03P119780	0.422725	https://www.genecards.org/cgi-bin/carddisp.pl?gene=NR1I2
SOD3	Superoxide Dismutase 3	Protein Coding	45	GC04P024798	0.422725	https://www.genecards.org/cgi-bin/carddisp.pl?gene=SOD3
ACADL	Acyl-CoA Dehydrogenase Long Chain	Protein Coding	43	GC02M210187	0.422725	https://www.genecards.org/cgi-bin/carddisp.pl?gene=ACADL
LDLR	Low Density Lipoprotein Receptor	Protein Coding	54	GC19P011091	0.406141	https://www.genecards.org/cgi-bin/carddisp.pl?gene=LDLR
ABCC2	ATP Binding Cassette Subfamily C Member 2	Protein Coding	51	GC10P099782	0.406141	https://www.genecards.org/cgi-bin/carddisp.pl?gene=ABCC2
NOS2	Nitric Oxide Synthase 2	Protein Coding	51	GC17M027756	0.406141	https://www.genecards.org/cgi-bin/carddisp.pl?gene=NOS2
CACNA2D1	Calcium Voltage-Gated Channel Auxiliary Subunit Alpha2delta 1	Protein Coding	50	GC07M081946	0.406141	https://www.genecards.org/cgi-bin/carddisp.pl?gene=CACNA2D1
CD44	CD44 Molecule (Indian Blood Group)	Protein Coding	50	GC11P035139	0.406141	https://www.genecards.org/cgi-bin/carddisp.pl?gene=CD44
TNFRSF11B	TNF Receptor Superfamily Member 11b	Protein Coding	50	GC08M118923	0.406141	https://www.genecards.org/cgi-bin/carddisp.pl?gene=TNFRSF11B
SOST	Sclerostin	Protein Coding	49	GC17M043753	0.406141	https://www.genecards.org/cgi-bin/carddisp.pl?gene=SOST
EIF2AK4	Eukaryotic Translation Initiation Factor 2 Alpha Kinase 4	Protein Coding	48	GC15P039934	0.406141	https://www.genecards.org/cgi-bin/carddisp.pl?gene=EIF2AK4
THBS1	Thrombospondin 1	Protein Coding	48	GC15P039581	0.406141	https://www.genecards.org/cgi-bin/carddisp.pl?gene=THBS1
POSTN	Periostin	Protein Coding	46	GC13M037562	0.406141	https://www.genecards.org/cgi-bin/carddisp.pl?gene=POSTN
PZP	PZP Alpha-2-Macroglobulin Like	Protein Coding	43	GC12M009148	0.406141	https://www.genecards.org/cgi-bin/carddisp.pl?gene=PZP
ST8SIA1	ST8 Alpha-N-Acetyl-Neuraminide Alpha-2,8-Sialyltransferase 1	Protein Coding	43	GC12M022063	0.406141	https://www.genecards.org/cgi-bin/carddisp.pl?gene=ST8SIA1
FARP1	FERM, ARH/RhoGEF And Pleckstrin Domain Protein 1	Protein Coding	41	GC13P098142	0.406141	https://www.genecards.org/cgi-bin/carddisp.pl?gene=FARP1
SLC9A9	Solute Carrier Family 9 Member A9	Protein Coding	41	GC03M143265	0.406141	https://www.genecards.org/cgi-bin/carddisp.pl?gene=SLC9A9
COL21A1	Collagen Type XXI Alpha 1 Chain	Protein Coding	40	GC06M069648	0.406141	https://www.genecards.org/cgi-bin/carddisp.pl?gene=COL21A1
SLC46A3	Solute Carrier Family 46 Member 3	Protein Coding	38	GC13M028700	0.406141	https://www.genecards.org/cgi-bin/carddisp.pl?gene=SLC46A3
EHBP1L1	EH Domain Binding Protein 1 Like 1	Protein Coding	37	GC11P070441	0.406141	https://www.genecards.org/cgi-bin/carddisp.pl?gene=EHBP1L1
SEL1L3	SEL1L Family Member 3	Protein Coding	37	GC04M025715	0.406141	https://www.genecards.org/cgi-bin/carddisp.pl?gene=SEL1L3
ZP4	Zona Pellucida Glycoprotein 4	Protein Coding	37	GC01M237877	0.406141	https://www.genecards.org/cgi-bin/carddisp.pl?gene=ZP4
MACROD2	Mono-ADP Ribosylhydrolase 2	Protein Coding	36	GC20P013925	0.406141	https://www.genecards.org/cgi-bin/carddisp.pl?gene=MACROD2
DDX60L	DExD/H-Box 60 Like	Protein Coding	34	GC04M168356	0.406141	https://www.genecards.org/cgi-bin/carddisp.pl?gene=DDX60L
LINC01684	Long Intergenic Non-Protein Coding RNA 1684	RNA Gene	13	GC21P024306	0.406141	https://www.genecards.org/cgi-bin/carddisp.pl?gene=LINC01684
ATP2A2	ATPase Sarcoplasmic/Endoplasmic Reticulum Ca2+ Transporting 2	Protein Coding	54	GC12P110280	0.38885	https://www.genecards.org/cgi-bin/carddisp.pl?gene=ATP2A2
HNRNPA1	Heterogeneous Nuclear Ribonucleoprotein A1	Protein Coding	50	GC12P054280	0.38885	https://www.genecards.org/cgi-bin/carddisp.pl?gene=HNRNPA1
CFD	Complement Factor D	Protein Coding	47	GC19P000859	0.38885	https://www.genecards.org/cgi-bin/carddisp.pl?gene=CFD
FADS2	Fatty Acid Desaturase 2	Protein Coding	47	GC11P061792	0.38885	https://www.genecards.org/cgi-bin/carddisp.pl?gene=FADS2
GC	GC Vitamin D Binding Protein	Protein Coding	47	GC04M071741	0.38885	https://www.genecards.org/cgi-bin/carddisp.pl?gene=GC
NNMT	Nicotinamide N-Methyltransferase	Protein Coding	47	GC11P114257	0.38885	https://www.genecards.org/cgi-bin/carddisp.pl?gene=NNMT
BMP6	Bone Morphogenetic Protein 6	Protein Coding	46	GC06P007726	0.38885	https://www.genecards.org/cgi-bin/carddisp.pl?gene=BMP6
CYP4A11	Cytochrome P450 Family 4 Subfamily A Member 11	Protein Coding	45	GC01M046929	0.38885	https://www.genecards.org/cgi-bin/carddisp.pl?gene=CYP4A11
HLA-DQB1	Major Histocompatibility Complex, Class II, DQ Beta 1	Protein Coding	45	GC06M069264	0.38885	https://www.genecards.org/cgi-bin/carddisp.pl?gene=HLA-DQB1
LCP1	Lymphocyte Cytosolic Protein 1	Protein Coding	45	GC13M046132	0.38885	https://www.genecards.org/cgi-bin/carddisp.pl?gene=LCP1
EDA	Ectodysplasin A	Protein Coding	44	GC0XP069618	0.38885	https://www.genecards.org/cgi-bin/carddisp.pl?gene=EDA
STING1	Stimulator Of Interferon Response CGAMP Interactor 1	Protein Coding	43	GC05M139476	0.38885	https://www.genecards.org/cgi-bin/carddisp.pl?gene=STING1
PLPPR4	Phospholipid Phosphatase Related 4	Protein Coding	38	GC01P099262	0.38885	https://www.genecards.org/cgi-bin/carddisp.pl?gene=PLPPR4
SLC38A8	Solute Carrier Family 38 Member 8	Protein Coding	38	GC16M084009	0.38885	https://www.genecards.org/cgi-bin/carddisp.pl?gene=SLC38A8
C1QTNF9	C1q And TNF Related 9	Protein Coding	36	GC13P024307	0.38885	https://www.genecards.org/cgi-bin/carddisp.pl?gene=C1QTNF9
MIR129-1	MicroRNA 129-1	RNA Gene	20	GC07P128207	0.38885	https://www.genecards.org/cgi-bin/carddisp.pl?gene=MIR129-1
IGKV2D-23	Immunoglobulin Kappa Variable 2D-23 (Pseudogene)	Pseudogene	6	GC02P091428	0.38885	https://www.genecards.org/cgi-bin/carddisp.pl?gene=IGKV2D-23
NOTCH1	Notch Receptor 1	Protein Coding	55	GC09M137632	0.370754	https://www.genecards.org/cgi-bin/carddisp.pl?gene=NOTCH1
RELA	RELA Proto-Oncogene, NF-KB Subunit	Protein Coding	54	GC11M065653	0.370754	https://www.genecards.org/cgi-bin/carddisp.pl?gene=RELA
USP7	Ubiquitin Specific Peptidase 7	Protein Coding	52	GC16M008892	0.370754	https://www.genecards.org/cgi-bin/carddisp.pl?gene=USP7
SQSTM1	Sequestosome 1	Protein Coding	51	GC05P179806	0.370754	https://www.genecards.org/cgi-bin/carddisp.pl?gene=SQSTM1
YAP1	Yes1 Associated Transcriptional Regulator	Protein Coding	50	GC11P102110	0.370754	https://www.genecards.org/cgi-bin/carddisp.pl?gene=YAP1
ADRB3	Adrenoceptor Beta 3	Protein Coding	49	GC08M037962	0.370754	https://www.genecards.org/cgi-bin/carddisp.pl?gene=ADRB3
CCN2	Cellular Communication Network Factor 2	Protein Coding	48	GC06M131948	0.370754	https://www.genecards.org/cgi-bin/carddisp.pl?gene=CCN2
PPARD	Peroxisome Proliferator Activated Receptor Delta	Protein Coding	48	GC06P087880	0.370754	https://www.genecards.org/cgi-bin/carddisp.pl?gene=PPARD
CHI3L1	Chitinase 3 Like 1	Protein Coding	47	GC01M203148	0.370754	https://www.genecards.org/cgi-bin/carddisp.pl?gene=CHI3L1
CPN1	Carboxypeptidase N Subunit 1	Protein Coding	47	GC10M100042	0.370754	https://www.genecards.org/cgi-bin/carddisp.pl?gene=CPN1
SDC4	Syndecan 4	Protein Coding	47	GC20M045325	0.370754	https://www.genecards.org/cgi-bin/carddisp.pl?gene=SDC4
CCL5	C-C Motif Chemokine Ligand 5	Protein Coding	46	GC17M035871	0.370754	https://www.genecards.org/cgi-bin/carddisp.pl?gene=CCL5
PDIA3	Protein Disulfide Isomerase Family A Member 3	Protein Coding	46	GC15P043746	0.370754	https://www.genecards.org/cgi-bin/carddisp.pl?gene=PDIA3
TAGLN	Transgelin	Protein Coding	46	GC11P117199	0.370754	https://www.genecards.org/cgi-bin/carddisp.pl?gene=TAGLN
ADH1B	Alcohol Dehydrogenase 1B (Class I), Beta Polypeptide	Protein Coding	45	GC04M099304	0.370754	https://www.genecards.org/cgi-bin/carddisp.pl?gene=ADH1B
OLR1	Oxidized Low Density Lipoprotein Receptor 1	Protein Coding	45	GC12M021842	0.370754	https://www.genecards.org/cgi-bin/carddisp.pl?gene=OLR1
PRL	Prolactin	Protein Coding	45	GC06M022287	0.370754	https://www.genecards.org/cgi-bin/carddisp.pl?gene=PRL
ABO	ABO, Alpha 1-3-N-Acetylgalactosaminyltransferase And Alpha 1-3-Galactosyltransferase	Protein Coding	43	GC09M133250	0.370754	https://www.genecards.org/cgi-bin/carddisp.pl?gene=ABO
JMJD1C	Jumonji Domain Containing 1C	Protein Coding	43	GC10M063167	0.370754	https://www.genecards.org/cgi-bin/carddisp.pl?gene=JMJD1C
GSDMD	Gasdermin D	Protein Coding	41	GC08P143553	0.370754	https://www.genecards.org/cgi-bin/carddisp.pl?gene=GSDMD
INSIG2	Insulin Induced Gene 2	Protein Coding	41	GC02P118088	0.370754	https://www.genecards.org/cgi-bin/carddisp.pl?gene=INSIG2
TMC4	Transmembrane Channel Like 4	Protein Coding	37	GC19M054160	0.370754	https://www.genecards.org/cgi-bin/carddisp.pl?gene=TMC4
MIR135A1	MicroRNA 135a-1	RNA Gene	22	GC03M052296	0.370754	https://www.genecards.org/cgi-bin/carddisp.pl?gene=MIR135A1
MIR627	MicroRNA 627	RNA Gene	18	GC15M042199	0.370754	https://www.genecards.org/cgi-bin/carddisp.pl?gene=MIR627
IDH1	Isocitrate Dehydrogenase (NADP(+)) 1	Protein Coding	56	GC02M208236	0.351728	https://www.genecards.org/cgi-bin/carddisp.pl?gene=IDH1
SLC2A1	Solute Carrier Family 2 Member 1	Protein Coding	56	GC01M042925	0.351728	https://www.genecards.org/cgi-bin/carddisp.pl?gene=SLC2A1
RPS6KA3	Ribosomal Protein S6 Kinase A3	Protein Coding	55	GC0XM020149	0.351728	https://www.genecards.org/cgi-bin/carddisp.pl?gene=RPS6KA3
CAT	Catalase	Protein Coding	54	GC11P034460	0.351728	https://www.genecards.org/cgi-bin/carddisp.pl?gene=CAT
PPIB	Peptidylprolyl Isomerase B	Protein Coding	54	GC15M064155	0.351728	https://www.genecards.org/cgi-bin/carddisp.pl?gene=PPIB
ATP1A1	ATPase Na+/K+ Transporting Subunit Alpha 1	Protein Coding	53	GC01P116372	0.351728	https://www.genecards.org/cgi-bin/carddisp.pl?gene=ATP1A1
PHGDH	Phosphoglycerate Dehydrogenase	Protein Coding	53	GC01P119660	0.351728	https://www.genecards.org/cgi-bin/carddisp.pl?gene=PHGDH
PRKDC	Protein Kinase, DNA-Activated, Catalytic Subunit	Protein Coding	53	GC08M047773	0.351728	https://www.genecards.org/cgi-bin/carddisp.pl?gene=PRKDC
VCP	Valosin Containing Protein	Protein Coding	53	GC09M035056	0.351728	https://www.genecards.org/cgi-bin/carddisp.pl?gene=VCP
ACTB	Actin Beta	Protein Coding	52	GC07M005527	0.351728	https://www.genecards.org/cgi-bin/carddisp.pl?gene=ACTB
CAD	Carbamoyl-Phosphate Synthetase 2, Aspartate Transcarbamylase, And Dihydroorotase	Protein Coding	52	GC02P027217	0.351728	https://www.genecards.org/cgi-bin/carddisp.pl?gene=CAD
GLUD1	Glutamate Dehydrogenase 1	Protein Coding	52	GC10M087050	0.351728	https://www.genecards.org/cgi-bin/carddisp.pl?gene=GLUD1
HSP90AA1	Heat Shock Protein 90 Alpha Family Class A Member 1	Protein Coding	52	GC14M102080	0.351728	https://www.genecards.org/cgi-bin/carddisp.pl?gene=HSP90AA1
P4HB	Prolyl 4-Hydroxylase Subunit Beta	Protein Coding	52	GC17M081843	0.351728	https://www.genecards.org/cgi-bin/carddisp.pl?gene=P4HB
PRDX1	Peroxiredoxin 1	Protein Coding	52	GC01M045511	0.351728	https://www.genecards.org/cgi-bin/carddisp.pl?gene=PRDX1
YWHAE	Tyrosine 3-Monooxygenase/Tryptophan 5-Monooxygenase Activation Protein Epsilon	Protein Coding	52	GC17M004893	0.351728	https://www.genecards.org/cgi-bin/carddisp.pl?gene=YWHAE
ANXA2	Annexin A2	Protein Coding	51	GC15M060347	0.351728	https://www.genecards.org/cgi-bin/carddisp.pl?gene=ANXA2
ASS1	Argininosuccinate Synthase 1	Protein Coding	51	GC09P130444	0.351728	https://www.genecards.org/cgi-bin/carddisp.pl?gene=ASS1
HSPD1	Heat Shock Protein Family D (Hsp60) Member 1	Protein Coding	51	GC02M197486	0.351728	https://www.genecards.org/cgi-bin/carddisp.pl?gene=HSPD1
LMNA	Lamin A/C	Protein Coding	51	GC01P156082	0.351728	https://www.genecards.org/cgi-bin/carddisp.pl?gene=LMNA
MYH9	Myosin Heavy Chain 9	Protein Coding	51	GC22M036281	0.351728	https://www.genecards.org/cgi-bin/carddisp.pl?gene=MYH9
TPM1	Tropomyosin 1	Protein Coding	51	GC15P123360	0.351728	https://www.genecards.org/cgi-bin/carddisp.pl?gene=TPM1
CTPS1	CTP Synthase 1	Protein Coding	50	GC01P040979	0.351728	https://www.genecards.org/cgi-bin/carddisp.pl?gene=CTPS1
EIF4G1	Eukaryotic Translation Initiation Factor 4 Gamma 1	Protein Coding	50	GC03P184314	0.351728	https://www.genecards.org/cgi-bin/carddisp.pl?gene=EIF4G1
FBN1	Fibrillin 1	Protein Coding	50	GC15M048408	0.351728	https://www.genecards.org/cgi-bin/carddisp.pl?gene=FBN1
FGB	Fibrinogen Beta Chain	Protein Coding	50	GC04P154598	0.351728	https://www.genecards.org/cgi-bin/carddisp.pl?gene=FGB
GANAB	Glucosidase II Alpha Subunit	Protein Coding	50	GC11M096927	0.351728	https://www.genecards.org/cgi-bin/carddisp.pl?gene=GANAB
KRT8	Keratin 8	Protein Coding	50	GC12M052897	0.351728	https://www.genecards.org/cgi-bin/carddisp.pl?gene=KRT8
PC	Pyruvate Carboxylase	Protein Coding	50	GC11M066848	0.351728	https://www.genecards.org/cgi-bin/carddisp.pl?gene=PC
PPP1CA	Protein Phosphatase 1 Catalytic Subunit Alpha	Protein Coding	50	GC11M097161	0.351728	https://www.genecards.org/cgi-bin/carddisp.pl?gene=PPP1CA
RPL5	Ribosomal Protein L5	Protein Coding	50	GC01P092832	0.351728	https://www.genecards.org/cgi-bin/carddisp.pl?gene=RPL5
SLC25A12	Solute Carrier Family 25 Member 12	Protein Coding	50	GC02M171783	0.351728	https://www.genecards.org/cgi-bin/carddisp.pl?gene=SLC25A12
SPTAN1	Spectrin Alpha, Non-Erythrocytic 1	Protein Coding	50	GC09P128552	0.351728	https://www.genecards.org/cgi-bin/carddisp.pl?gene=SPTAN1
TPM3	Tropomyosin 3	Protein Coding	50	GC01M154127	0.351728	https://www.genecards.org/cgi-bin/carddisp.pl?gene=TPM3
CDH5	Cadherin 5	Protein Coding	49	GC16P066366	0.351728	https://www.genecards.org/cgi-bin/carddisp.pl?gene=CDH5
GFPT1	Glutamine--Fructose-6-Phosphate Transaminase 1	Protein Coding	49	GC02M069283	0.351728	https://www.genecards.org/cgi-bin/carddisp.pl?gene=GFPT1
TARDBP	TAR DNA Binding Protein	Protein Coding	49	GC01P011013	0.351728	https://www.genecards.org/cgi-bin/carddisp.pl?gene=TARDBP
THBD	Thrombomodulin	Protein Coding	49	GC20M023026	0.351728	https://www.genecards.org/cgi-bin/carddisp.pl?gene=THBD
TPM2	Tropomyosin 2	Protein Coding	49	GC09M035672	0.351728	https://www.genecards.org/cgi-bin/carddisp.pl?gene=TPM2
YWHAQ	Tyrosine 3-Monooxygenase/Tryptophan 5-Monooxygenase Activation Protein Theta	Protein Coding	49	GC02M009583	0.351728	https://www.genecards.org/cgi-bin/carddisp.pl?gene=YWHAQ
CFL1	Cofilin 1	Protein Coding	48	GC11M065823	0.351728	https://www.genecards.org/cgi-bin/carddisp.pl?gene=CFL1
CLTC	Clathrin Heavy Chain	Protein Coding	48	GC17P059619	0.351728	https://www.genecards.org/cgi-bin/carddisp.pl?gene=CLTC
DDX5	DEAD-Box Helicase 5	Protein Coding	48	GC17M064498	0.351728	https://www.genecards.org/cgi-bin/carddisp.pl?gene=DDX5
DHCR24	24-Dehydrocholesterol Reductase	Protein Coding	48	GC01M054849	0.351728	https://www.genecards.org/cgi-bin/carddisp.pl?gene=DHCR24
EIF4A1	Eukaryotic Translation Initiation Factor 4A1	Protein Coding	48	GC17P007572	0.351728	https://www.genecards.org/cgi-bin/carddisp.pl?gene=EIF4A1
FGF23	Fibroblast Growth Factor 23	Protein Coding	48	GC12M004368	0.351728	https://www.genecards.org/cgi-bin/carddisp.pl?gene=FGF23
HADHA	Hydroxyacyl-CoA Dehydrogenase Trifunctional Multienzyme Complex Subunit Alpha	Protein Coding	48	GC02M026190	0.351728	https://www.genecards.org/cgi-bin/carddisp.pl?gene=HADHA
HYOU1	Hypoxia Up-Regulated 1	Protein Coding	48	GC11M119242	0.351728	https://www.genecards.org/cgi-bin/carddisp.pl?gene=HYOU1
MCM5	Minichromosome Maintenance Complex Component 5	Protein Coding	48	GC22P035400	0.351728	https://www.genecards.org/cgi-bin/carddisp.pl?gene=MCM5
MYH10	Myosin Heavy Chain 10	Protein Coding	48	GC17M008474	0.351728	https://www.genecards.org/cgi-bin/carddisp.pl?gene=MYH10
MYH14	Myosin Heavy Chain 14	Protein Coding	48	GC19P070243	0.351728	https://www.genecards.org/cgi-bin/carddisp.pl?gene=MYH14
RUVBL2	RuvB Like AAA ATPase 2	Protein Coding	48	GC19P048993	0.351728	https://www.genecards.org/cgi-bin/carddisp.pl?gene=RUVBL2
SERPINH1	Serpin Family H Member 1	Protein Coding	48	GC11P075562	0.351728	https://www.genecards.org/cgi-bin/carddisp.pl?gene=SERPINH1
SF3B1	Splicing Factor 3b Subunit 1	Protein Coding	48	GC02M197432	0.351728	https://www.genecards.org/cgi-bin/carddisp.pl?gene=SF3B1
SLC25A1	Solute Carrier Family 25 Member 1	Protein Coding	48	GC22M019400	0.351728	https://www.genecards.org/cgi-bin/carddisp.pl?gene=SLC25A1
TMPO	Thymopoietin	Protein Coding	48	GC12P098515	0.351728	https://www.genecards.org/cgi-bin/carddisp.pl?gene=TMPO
UGDH	UDP-Glucose 6-Dehydrogenase	Protein Coding	48	GC04M039502	0.351728	https://www.genecards.org/cgi-bin/carddisp.pl?gene=UGDH
ATF3	Activating Transcription Factor 3	Protein Coding	47	GC01P212565	0.351728	https://www.genecards.org/cgi-bin/carddisp.pl?gene=ATF3
CANX	Calnexin	Protein Coding	47	GC05P179678	0.351728	https://www.genecards.org/cgi-bin/carddisp.pl?gene=CANX
CCT5	Chaperonin Containing TCP1 Subunit 5	Protein Coding	47	GC05P010236	0.351728	https://www.genecards.org/cgi-bin/carddisp.pl?gene=CCT5
DDX1	DEAD-Box Helicase 1	Protein Coding	47	GC02P015591	0.351728	https://www.genecards.org/cgi-bin/carddisp.pl?gene=DDX1
DPM1	Dolichyl-Phosphate Mannosyltransferase Subunit 1, Catalytic	Protein Coding	47	GC20M050934	0.351728	https://www.genecards.org/cgi-bin/carddisp.pl?gene=DPM1
GARS1	Glycyl-TRNA Synthetase 1	Protein Coding	47	GC07P030580	0.351728	https://www.genecards.org/cgi-bin/carddisp.pl?gene=GARS1
HNRNPK	Heterogeneous Nuclear Ribonucleoprotein K	Protein Coding	47	GC09M095069	0.351728	https://www.genecards.org/cgi-bin/carddisp.pl?gene=HNRNPK
HSPA6	Heat Shock Protein Family A (Hsp70) Member 6	Protein Coding	47	GC01P161524	0.351728	https://www.genecards.org/cgi-bin/carddisp.pl?gene=HSPA6
HUWE1	HECT, UBA And WWE Domain Containing E3 Ubiquitin Protein Ligase 1	Protein Coding	47	GC0XM053532	0.351728	https://www.genecards.org/cgi-bin/carddisp.pl?gene=HUWE1
MARS1	Methionyl-TRNA Synthetase 1	Protein Coding	47	GC12P057476	0.351728	https://www.genecards.org/cgi-bin/carddisp.pl?gene=MARS1
MCM3	Minichromosome Maintenance Complex Component 3	Protein Coding	47	GC06M052264	0.351728	https://www.genecards.org/cgi-bin/carddisp.pl?gene=MCM3
MCM7	Minichromosome Maintenance Complex Component 7	Protein Coding	47	GC07M100092	0.351728	https://www.genecards.org/cgi-bin/carddisp.pl?gene=MCM7
MYO6	Myosin VI	Protein Coding	47	GC06P075749	0.351728	https://www.genecards.org/cgi-bin/carddisp.pl?gene=MYO6
NCL	Nucleolin	Protein Coding	47	GC02M231453	0.351728	https://www.genecards.org/cgi-bin/carddisp.pl?gene=NCL
NDUFS1	NADH:Ubiquinone Oxidoreductase Core Subunit S1	Protein Coding	47	GC02M206114	0.351728	https://www.genecards.org/cgi-bin/carddisp.pl?gene=NDUFS1
RARS1	Arginyl-TRNA Synthetase 1	Protein Coding	47	GC05P168487	0.351728	https://www.genecards.org/cgi-bin/carddisp.pl?gene=RARS1
RPN1	Ribophorin I	Protein Coding	47	GC03M128619	0.351728	https://www.genecards.org/cgi-bin/carddisp.pl?gene=RPN1
RUVBL1	RuvB Like AAA ATPase 1	Protein Coding	47	GC03M128064	0.351728	https://www.genecards.org/cgi-bin/carddisp.pl?gene=RUVBL1
XRCC5	X-Ray Repair Cross Complementing 5	Protein Coding	47	GC02P216107	0.351728	https://www.genecards.org/cgi-bin/carddisp.pl?gene=XRCC5
ACTR2	Actin Related Protein 2	Protein Coding	46	GC02P065227	0.351728	https://www.genecards.org/cgi-bin/carddisp.pl?gene=ACTR2
EIF4A2	Eukaryotic Translation Initiation Factor 4A2	Protein Coding	46	GC03P186783	0.351728	https://www.genecards.org/cgi-bin/carddisp.pl?gene=EIF4A2
IARS1	Isoleucyl-TRNA Synthetase 1	Protein Coding	46	GC09M095306	0.351728	https://www.genecards.org/cgi-bin/carddisp.pl?gene=IARS1
RPL10	Ribosomal Protein L10	Protein Coding	46	GC0XP154389	0.351728	https://www.genecards.org/cgi-bin/carddisp.pl?gene=RPL10
SLC25A11	Solute Carrier Family 25 Member 11	Protein Coding	46	GC17M004937	0.351728	https://www.genecards.org/cgi-bin/carddisp.pl?gene=SLC25A11
SLC25A3	Solute Carrier Family 25 Member 3	Protein Coding	46	GC12P098593	0.351728	https://www.genecards.org/cgi-bin/carddisp.pl?gene=SLC25A3
SULT2A1	Sulfotransferase Family 2A Member 1	Protein Coding	46	GC19M047870	0.351728	https://www.genecards.org/cgi-bin/carddisp.pl?gene=SULT2A1
ARPC1B	Actin Related Protein 2/3 Complex Subunit 1B	Protein Coding	45	GC07P099374	0.351728	https://www.genecards.org/cgi-bin/carddisp.pl?gene=ARPC1B
ARPC2	Actin Related Protein 2/3 Complex Subunit 2	Protein Coding	45	GC02P218217	0.351728	https://www.genecards.org/cgi-bin/carddisp.pl?gene=ARPC2
CALD1	Caldesmon 1	Protein Coding	45	GC07P134744	0.351728	https://www.genecards.org/cgi-bin/carddisp.pl?gene=CALD1
DARS1	Aspartyl-TRNA Synthetase 1	Protein Coding	45	GC02M135905	0.351728	https://www.genecards.org/cgi-bin/carddisp.pl?gene=DARS1
EFTUD2	Elongation Factor Tu GTP Binding Domain Containing 2	Protein Coding	45	GC17M049914	0.351728	https://www.genecards.org/cgi-bin/carddisp.pl?gene=EFTUD2
EIF3F	Eukaryotic Translation Initiation Factor 3 Subunit F	Protein Coding	45	GC11P007966	0.351728	https://www.genecards.org/cgi-bin/carddisp.pl?gene=EIF3F
EIF4A3	Eukaryotic Translation Initiation Factor 4A3	Protein Coding	45	GC17M080135	0.351728	https://www.genecards.org/cgi-bin/carddisp.pl?gene=EIF4A3
EPRS1	Glutamyl-Prolyl-TRNA Synthetase 1	Protein Coding	45	GC01M219969	0.351728	https://www.genecards.org/cgi-bin/carddisp.pl?gene=EPRS1
HNRNPU	Heterogeneous Nuclear Ribonucleoprotein U	Protein Coding	45	GC01M244844	0.351728	https://www.genecards.org/cgi-bin/carddisp.pl?gene=HNRNPU
LRPPRC	Leucine Rich Pentatricopeptide Repeat Containing	Protein Coding	45	GC02M043886	0.351728	https://www.genecards.org/cgi-bin/carddisp.pl?gene=LRPPRC
MYO1C	Myosin IC	Protein Coding	45	GC17M001464	0.351728	https://www.genecards.org/cgi-bin/carddisp.pl?gene=MYO1C
PABPC1	Poly(A) Binding Protein Cytoplasmic 1	Protein Coding	45	GC08M100685	0.351728	https://www.genecards.org/cgi-bin/carddisp.pl?gene=PABPC1
PSMD2	Proteasome 26S Subunit Ubiquitin Receptor, Non-ATPase 2	Protein Coding	45	GC03P184298	0.351728	https://www.genecards.org/cgi-bin/carddisp.pl?gene=PSMD2
PTBP1	Polypyrimidine Tract Binding Protein 1	Protein Coding	45	GC19P000797	0.351728	https://www.genecards.org/cgi-bin/carddisp.pl?gene=PTBP1
PUF60	Poly(U) Binding Splicing Factor 60	Protein Coding	45	GC08M143816	0.351728	https://www.genecards.org/cgi-bin/carddisp.pl?gene=PUF60
RPL10A	Ribosomal Protein L10a	Protein Coding	45	GC06P087884	0.351728	https://www.genecards.org/cgi-bin/carddisp.pl?gene=RPL10A
RPL13	Ribosomal Protein L13	Protein Coding	45	GC16P091453	0.351728	https://www.genecards.org/cgi-bin/carddisp.pl?gene=RPL13
RPL27	Ribosomal Protein L27	Protein Coding	45	GC17P042998	0.351728	https://www.genecards.org/cgi-bin/carddisp.pl?gene=RPL27
RPS15A	Ribosomal Protein S15a	Protein Coding	45	GC16M018781	0.351728	https://www.genecards.org/cgi-bin/carddisp.pl?gene=RPS15A
RPS17	Ribosomal Protein S17	Protein Coding	45	GC15M082536	0.351728	https://www.genecards.org/cgi-bin/carddisp.pl?gene=RPS17
SLC3A2	Solute Carrier Family 3 Member 2	Protein Coding	45	GC11P062856	0.351728	https://www.genecards.org/cgi-bin/carddisp.pl?gene=SLC3A2
TCP1	T-Complex 1	Protein Coding	45	GC06M159778	0.351728	https://www.genecards.org/cgi-bin/carddisp.pl?gene=TCP1
UCP1	Uncoupling Protein 1	Protein Coding	45	GC04M140559	0.351728	https://www.genecards.org/cgi-bin/carddisp.pl?gene=UCP1
ACSL3	Acyl-CoA Synthetase Long Chain Family Member 3	Protein Coding	44	GC02P222860	0.351728	https://www.genecards.org/cgi-bin/carddisp.pl?gene=ACSL3
ACTR3	Actin Related Protein 3	Protein Coding	44	GC02P113889	0.351728	https://www.genecards.org/cgi-bin/carddisp.pl?gene=ACTR3
AP2B1	Adaptor Related Protein Complex 2 Subunit Beta 1	Protein Coding	44	GC17P035578	0.351728	https://www.genecards.org/cgi-bin/carddisp.pl?gene=AP2B1
ATP5F1B	ATP Synthase F1 Subunit Beta	Protein Coding	44	GC12M056973	0.351728	https://www.genecards.org/cgi-bin/carddisp.pl?gene=ATP5F1B
CCT2	Chaperonin Containing TCP1 Subunit 2	Protein Coding	44	GC12P069585	0.351728	https://www.genecards.org/cgi-bin/carddisp.pl?gene=CCT2
CCT3	Chaperonin Containing TCP1 Subunit 3	Protein Coding	44	GC01M156308	0.351728	https://www.genecards.org/cgi-bin/carddisp.pl?gene=CCT3
CCT4	Chaperonin Containing TCP1 Subunit 4	Protein Coding	44	GC02M061868	0.351728	https://www.genecards.org/cgi-bin/carddisp.pl?gene=CCT4
DHX9	DExH-Box Helicase 9	Protein Coding	44	GC01P182839	0.351728	https://www.genecards.org/cgi-bin/carddisp.pl?gene=DHX9
DNAJA1	DnaJ Heat Shock Protein Family (Hsp40) Member A1	Protein Coding	44	GC09P033025	0.351728	https://www.genecards.org/cgi-bin/carddisp.pl?gene=DNAJA1
DNAJB11	DnaJ Heat Shock Protein Family (Hsp40) Member B11	Protein Coding	44	GC03P186567	0.351728	https://www.genecards.org/cgi-bin/carddisp.pl?gene=DNAJB11
ERLIN2	ER Lipid Raft Associated 2	Protein Coding	44	GC08P037736	0.351728	https://www.genecards.org/cgi-bin/carddisp.pl?gene=ERLIN2
FABP2	Fatty Acid Binding Protein 2	Protein Coding	44	GC04M119317	0.351728	https://www.genecards.org/cgi-bin/carddisp.pl?gene=FABP2
FARSA	Phenylalanyl-TRNA Synthetase Subunit Alpha	Protein Coding	44	GC19M012922	0.351728	https://www.genecards.org/cgi-bin/carddisp.pl?gene=FARSA
HNRNPC	Heterogeneous Nuclear Ribonucleoprotein C	Protein Coding	44	GC14M023009	0.351728	https://www.genecards.org/cgi-bin/carddisp.pl?gene=HNRNPC
HSPH1	Heat Shock Protein Family H (Hsp110) Member 1	Protein Coding	44	GC13M031134	0.351728	https://www.genecards.org/cgi-bin/carddisp.pl?gene=HSPH1
MATR3	Matrin 3	Protein Coding	44	GC05P139274	0.351728	https://www.genecards.org/cgi-bin/carddisp.pl?gene=MATR3
PABPC4	Poly(A) Binding Protein Cytoplasmic 4	Protein Coding	44	GC01M039560	0.351728	https://www.genecards.org/cgi-bin/carddisp.pl?gene=PABPC4
PCBP1	Poly(RC) Binding Protein 1	Protein Coding	44	GC02P070087	0.351728	https://www.genecards.org/cgi-bin/carddisp.pl?gene=PCBP1
PCBP2	Poly(RC) Binding Protein 2	Protein Coding	44	GC12P053452	0.351728	https://www.genecards.org/cgi-bin/carddisp.pl?gene=PCBP2
PRPF8	Pre-MRNA Processing Factor 8	Protein Coding	44	GC17M001650	0.351728	https://www.genecards.org/cgi-bin/carddisp.pl?gene=PRPF8
RPL12	Ribosomal Protein L12	Protein Coding	44	GC09M127447	0.351728	https://www.genecards.org/cgi-bin/carddisp.pl?gene=RPL12
RPL3	Ribosomal Protein L3	Protein Coding	44	GC22M059433	0.351728	https://www.genecards.org/cgi-bin/carddisp.pl?gene=RPL3
RPL7	Ribosomal Protein L7	Protein Coding	44	GC08M073290	0.351728	https://www.genecards.org/cgi-bin/carddisp.pl?gene=RPL7
RPL7A	Ribosomal Protein L7a	Protein Coding	44	GC09P133348	0.351728	https://www.genecards.org/cgi-bin/carddisp.pl?gene=RPL7A
RPL8	Ribosomal Protein L8	Protein Coding	44	GC08M145536	0.351728	https://www.genecards.org/cgi-bin/carddisp.pl?gene=RPL8
RPS2	Ribosomal Protein S2	Protein Coding	44	GC16M007541	0.351728	https://www.genecards.org/cgi-bin/carddisp.pl?gene=RPS2
RPS23	Ribosomal Protein S23	Protein Coding	44	GC05M082273	0.351728	https://www.genecards.org/cgi-bin/carddisp.pl?gene=RPS23
RPS9	Ribosomal Protein S9	Protein Coding	44	GC19P072366	0.351728	https://www.genecards.org/cgi-bin/carddisp.pl?gene=RPS9
SLC25A10	Solute Carrier Family 25 Member 10	Protein Coding	44	GC17P081712	0.351728	https://www.genecards.org/cgi-bin/carddisp.pl?gene=SLC25A10
SNRNP200	Small Nuclear Ribonucleoprotein U5 Subunit 200	Protein Coding	44	GC02M098504	0.351728	https://www.genecards.org/cgi-bin/carddisp.pl?gene=SNRNP200
SRSF1	Serine And Arginine Rich Splicing Factor 1	Protein Coding	44	GC17M058000	0.351728	https://www.genecards.org/cgi-bin/carddisp.pl?gene=SRSF1
TUBA1C	Tubulin Alpha 1c	Protein Coding	44	GC12P049188	0.351728	https://www.genecards.org/cgi-bin/carddisp.pl?gene=TUBA1C
AP2A1	Adaptor Related Protein Complex 2 Subunit Alpha 1	Protein Coding	43	GC19P070214	0.351728	https://www.genecards.org/cgi-bin/carddisp.pl?gene=AP2A1
ATAD3A	ATPase Family AAA Domain Containing 3A	Protein Coding	43	GC01P004136	0.351728	https://www.genecards.org/cgi-bin/carddisp.pl?gene=ATAD3A
CCT8	Chaperonin Containing TCP1 Subunit 8	Protein Coding	43	GC21M029055	0.351728	https://www.genecards.org/cgi-bin/carddisp.pl?gene=CCT8
DDX17	DEAD-Box Helicase 17	Protein Coding	43	GC22M038483	0.351728	https://www.genecards.org/cgi-bin/carddisp.pl?gene=DDX17
DHX15	DEAH-Box Helicase 15	Protein Coding	43	GC04M024519	0.351728	https://www.genecards.org/cgi-bin/carddisp.pl?gene=DHX15
EIF3E	Eukaryotic Translation Initiation Factor 3 Subunit E	Protein Coding	43	GC08M108163	0.351728	https://www.genecards.org/cgi-bin/carddisp.pl?gene=EIF3E
H1-4	H1.4 Linker Histone, Cluster Member	Protein Coding	43	GC06P088590	0.351728	https://www.genecards.org/cgi-bin/carddisp.pl?gene=H1-4
HNRNPF	Heterogeneous Nuclear Ribonucleoprotein F	Protein Coding	43	GC10M043385	0.351728	https://www.genecards.org/cgi-bin/carddisp.pl?gene=HNRNPF
HNRNPH1	Heterogeneous Nuclear Ribonucleoprotein H1	Protein Coding	43	GC05M179614	0.351728	https://www.genecards.org/cgi-bin/carddisp.pl?gene=HNRNPH1
HNRNPL	Heterogeneous Nuclear Ribonucleoprotein L	Protein Coding	43	GC19M038836	0.351728	https://www.genecards.org/cgi-bin/carddisp.pl?gene=HNRNPL
HNRNPM	Heterogeneous Nuclear Ribonucleoprotein M	Protein Coding	43	GC19P008444	0.351728	https://www.genecards.org/cgi-bin/carddisp.pl?gene=HNRNPM
IGF2BP1	Insulin Like Growth Factor 2 MRNA Binding Protein 1	Protein Coding	43	GC17P058961	0.351728	https://www.genecards.org/cgi-bin/carddisp.pl?gene=IGF2BP1
IMMT	Inner Membrane Mitochondrial Protein	Protein Coding	43	GC02M086144	0.351728	https://www.genecards.org/cgi-bin/carddisp.pl?gene=IMMT
PSMC2	Proteasome 26S Subunit, ATPase 2	Protein Coding	43	GC07P103328	0.351728	https://www.genecards.org/cgi-bin/carddisp.pl?gene=PSMC2
RPL23A	Ribosomal Protein L23a	Protein Coding	43	GC17P028719	0.351728	https://www.genecards.org/cgi-bin/carddisp.pl?gene=RPL23A
RPL24	Ribosomal Protein L24	Protein Coding	43	GC03M101681	0.351728	https://www.genecards.org/cgi-bin/carddisp.pl?gene=RPL24
RPL30	Ribosomal Protein L30	Protein Coding	43	GC08M098024	0.351728	https://www.genecards.org/cgi-bin/carddisp.pl?gene=RPL30
RPL9	Ribosomal Protein L9	Protein Coding	43	GC04M039452	0.351728	https://www.genecards.org/cgi-bin/carddisp.pl?gene=RPL9
RPLP2	Ribosomal Protein Lateral Stalk Subunit P2	Protein Coding	43	GC11P001960	0.351728	https://www.genecards.org/cgi-bin/carddisp.pl?gene=RPLP2
RPS11	Ribosomal Protein S11	Protein Coding	43	GC19P049496	0.351728	https://www.genecards.org/cgi-bin/carddisp.pl?gene=RPS11
RPS15	Ribosomal Protein S15	Protein Coding	43	GC19P001438	0.351728	https://www.genecards.org/cgi-bin/carddisp.pl?gene=RPS15
RPS3A	Ribosomal Protein S3A	Protein Coding	43	GC04P151099	0.351728	https://www.genecards.org/cgi-bin/carddisp.pl?gene=RPS3A
SLC25A22	Solute Carrier Family 25 Member 22	Protein Coding	43	GC11M003909	0.351728	https://www.genecards.org/cgi-bin/carddisp.pl?gene=SLC25A22
SRSF7	Serine And Arginine Rich Splicing Factor 7	Protein Coding	43	GC02M038743	0.351728	https://www.genecards.org/cgi-bin/carddisp.pl?gene=SRSF7
TXNL1	Thioredoxin Like 1	Protein Coding	43	GC18M056597	0.351728	https://www.genecards.org/cgi-bin/carddisp.pl?gene=TXNL1
VIL1	Villin 1	Protein Coding	43	GC02P218419	0.351728	https://www.genecards.org/cgi-bin/carddisp.pl?gene=VIL1
AHSA1	Activator Of HSP90 ATPase Activity 1	Protein Coding	42	GC14P077457	0.351728	https://www.genecards.org/cgi-bin/carddisp.pl?gene=AHSA1
CAND1	Cullin Associated And Neddylation Dissociated 1	Protein Coding	42	GC12P067270	0.351728	https://www.genecards.org/cgi-bin/carddisp.pl?gene=CAND1
COLGALT1	Collagen Beta(1-O)Galactosyltransferase 1	Protein Coding	42	GC19P017555	0.351728	https://www.genecards.org/cgi-bin/carddisp.pl?gene=COLGALT1
EIF3L	Eukaryotic Translation Initiation Factor 3 Subunit L	Protein Coding	42	GC22P037848	0.351728	https://www.genecards.org/cgi-bin/carddisp.pl?gene=EIF3L
PEG10	Paternally Expressed 10	Protein Coding	42	GC07P094656	0.351728	https://www.genecards.org/cgi-bin/carddisp.pl?gene=PEG10
RPL6	Ribosomal Protein L6	Protein Coding	42	GC12M112320	0.351728	https://www.genecards.org/cgi-bin/carddisp.pl?gene=RPL6
SF3B3	Splicing Factor 3b Subunit 3	Protein Coding	42	GC16P070523	0.351728	https://www.genecards.org/cgi-bin/carddisp.pl?gene=SF3B3
SNRPD2	Small Nuclear Ribonucleoprotein D2 Polypeptide	Protein Coding	42	GC19M068023	0.351728	https://www.genecards.org/cgi-bin/carddisp.pl?gene=SNRPD2
SRSF4	Serine And Arginine Rich Splicing Factor 4	Protein Coding	42	GC01M029147	0.351728	https://www.genecards.org/cgi-bin/carddisp.pl?gene=SRSF4
TMSB4X	Thymosin Beta 4 X-Linked	Protein Coding	42	GC0XP012975	0.351728	https://www.genecards.org/cgi-bin/carddisp.pl?gene=TMSB4X
TPM4	Tropomyosin 4	Protein Coding	42	GC19P069286	0.351728	https://www.genecards.org/cgi-bin/carddisp.pl?gene=TPM4
YBX1	Y-Box Binding Protein 1	Protein Coding	42	GC01P042682	0.351728	https://www.genecards.org/cgi-bin/carddisp.pl?gene=YBX1
ARPC4	Actin Related Protein 2/3 Complex Subunit 4	Protein Coding	41	GC03P009792	0.351728	https://www.genecards.org/cgi-bin/carddisp.pl?gene=ARPC4
ATXN2L	Ataxin 2 Like	Protein Coding	41	GC16P041751	0.351728	https://www.genecards.org/cgi-bin/carddisp.pl?gene=ATXN2L
DDX46	DEAD-Box Helicase 46	Protein Coding	41	GC05P134758	0.351728	https://www.genecards.org/cgi-bin/carddisp.pl?gene=DDX46
EDC4	Enhancer Of MRNA Decapping 4	Protein Coding	41	GC16P067873	0.351728	https://www.genecards.org/cgi-bin/carddisp.pl?gene=EDC4
EIF3B	Eukaryotic Translation Initiation Factor 3 Subunit B	Protein Coding	41	GC07P002354	0.351728	https://www.genecards.org/cgi-bin/carddisp.pl?gene=EIF3B
HNRNPA3	Heterogeneous Nuclear Ribonucleoprotein A3	Protein Coding	41	GC02P177212	0.351728	https://www.genecards.org/cgi-bin/carddisp.pl?gene=HNRNPA3
HSD17B11	Hydroxysteroid 17-Beta Dehydrogenase 11	Protein Coding	41	GC04M087336	0.351728	https://www.genecards.org/cgi-bin/carddisp.pl?gene=HSD17B11
LRRFIP2	LRR Binding FLII Interacting Protein 2	Protein Coding	41	GC03M037052	0.351728	https://www.genecards.org/cgi-bin/carddisp.pl?gene=LRRFIP2
MYBBP1A	MYB Binding Protein 1a	Protein Coding	41	GC17M004538	0.351728	https://www.genecards.org/cgi-bin/carddisp.pl?gene=MYBBP1A
MYL6B	Myosin Light Chain 6B	Protein Coding	41	GC12P057369	0.351728	https://www.genecards.org/cgi-bin/carddisp.pl?gene=MYL6B
MYO1B	Myosin IB	Protein Coding	41	GC02P191246	0.351728	https://www.genecards.org/cgi-bin/carddisp.pl?gene=MYO1B
MYO1D	Myosin ID	Protein Coding	41	GC17M032492	0.351728	https://www.genecards.org/cgi-bin/carddisp.pl?gene=MYO1D
RBM14	RNA Binding Motif Protein 14	Protein Coding	41	GC11P070545	0.351728	https://www.genecards.org/cgi-bin/carddisp.pl?gene=RBM14
RNF6	Ring Finger Protein 6	Protein Coding	41	GC13M026132	0.351728	https://www.genecards.org/cgi-bin/carddisp.pl?gene=RNF6
RPS18	Ribosomal Protein S18	Protein Coding	41	GC06P087803	0.351728	https://www.genecards.org/cgi-bin/carddisp.pl?gene=RPS18
RPS4X	Ribosomal Protein S4 X-Linked	Protein Coding	41	GC0XM072255	0.351728	https://www.genecards.org/cgi-bin/carddisp.pl?gene=RPS4X
RPS8	Ribosomal Protein S8	Protein Coding	41	GC01P044775	0.351728	https://www.genecards.org/cgi-bin/carddisp.pl?gene=RPS8
RRBP1	Ribosome Binding Protein 1	Protein Coding	41	GC20M017613	0.351728	https://www.genecards.org/cgi-bin/carddisp.pl?gene=RRBP1
RTCB	RNA 2',3'-Cyclic Phosphate And 5'-OH Ligase	Protein Coding	41	GC22M032387	0.351728	https://www.genecards.org/cgi-bin/carddisp.pl?gene=RTCB
SUB1	SUB1 Regulator Of Transcription	Protein Coding	41	GC05P032697	0.351728	https://www.genecards.org/cgi-bin/carddisp.pl?gene=SUB1
TMOD3	Tropomodulin 3	Protein Coding	41	GC15P051829	0.351728	https://www.genecards.org/cgi-bin/carddisp.pl?gene=TMOD3
YBX3	Y-Box Binding Protein 3	Protein Coding	41	GC12M021855	0.351728	https://www.genecards.org/cgi-bin/carddisp.pl?gene=YBX3
AHNAK	AHNAK Nucleoprotein	Protein Coding	40	GC11M096914	0.351728	https://www.genecards.org/cgi-bin/carddisp.pl?gene=AHNAK
AP2A2	Adaptor Related Protein Complex 2 Subunit Alpha 2	Protein Coding	40	GC11P000924	0.351728	https://www.genecards.org/cgi-bin/carddisp.pl?gene=AP2A2
CLGN	Calmegin	Protein Coding	40	GC04M140388	0.351728	https://www.genecards.org/cgi-bin/carddisp.pl?gene=CLGN
FAF2	Fas Associated Factor Family Member 2	Protein Coding	40	GC05P176447	0.351728	https://www.genecards.org/cgi-bin/carddisp.pl?gene=FAF2
ILF2	Interleukin Enhancer Binding Factor 2	Protein Coding	40	GC01M153661	0.351728	https://www.genecards.org/cgi-bin/carddisp.pl?gene=ILF2
ILF3	Interleukin Enhancer Binding Factor 3	Protein Coding	40	GC19P010656	0.351728	https://www.genecards.org/cgi-bin/carddisp.pl?gene=ILF3
MYO18A	Myosin XVIIIA	Protein Coding	40	GC17M044997	0.351728	https://www.genecards.org/cgi-bin/carddisp.pl?gene=MYO18A
SRRM1	Serine And Arginine Repetitive Matrix 1	Protein Coding	40	GC01P024631	0.351728	https://www.genecards.org/cgi-bin/carddisp.pl?gene=SRRM1
CCAR2	Cell Cycle And Apoptosis Regulator 2	Protein Coding	39	GC08P022604	0.351728	https://www.genecards.org/cgi-bin/carddisp.pl?gene=CCAR2
CKAP4	Cytoskeleton Associated Protein 4	Protein Coding	39	GC12M106237	0.351728	https://www.genecards.org/cgi-bin/carddisp.pl?gene=CKAP4
DNAJC11	DnaJ Heat Shock Protein Family (Hsp40) Member C11	Protein Coding	39	GC01M006634	0.351728	https://www.genecards.org/cgi-bin/carddisp.pl?gene=DNAJC11
H4C16	H4 Histone 16	Protein Coding	39	GC12M022008	0.351728	https://www.genecards.org/cgi-bin/carddisp.pl?gene=H4C16
HNRNPUL1	Heterogeneous Nuclear Ribonucleoprotein U Like 1	Protein Coding	39	GC19P041262	0.351728	https://www.genecards.org/cgi-bin/carddisp.pl?gene=HNRNPUL1
NUDT21	Nudix Hydrolase 21	Protein Coding	39	GC16M056429	0.351728	https://www.genecards.org/cgi-bin/carddisp.pl?gene=NUDT21
SRRM2	Serine/Arginine Repetitive Matrix 2	Protein Coding	39	GC16P012713	0.351728	https://www.genecards.org/cgi-bin/carddisp.pl?gene=SRRM2
EBNA1BP2	EBNA1 Binding Protein 2	Protein Coding	38	GC01M043165	0.351728	https://www.genecards.org/cgi-bin/carddisp.pl?gene=EBNA1BP2
PGAM5	PGAM Family Member 5, Mitochondrial Serine/Threonine Protein Phosphatase	Protein Coding	38	GC12P132710	0.351728	https://www.genecards.org/cgi-bin/carddisp.pl?gene=PGAM5
RTRAF	RNA Transcription, Translation And Transport Factor	Protein Coding	38	GC14P051992	0.351728	https://www.genecards.org/cgi-bin/carddisp.pl?gene=RTRAF
SEC16A	SEC16 Homolog A, Endoplasmic Reticulum Export Factor	Protein Coding	38	GC09M136440	0.351728	https://www.genecards.org/cgi-bin/carddisp.pl?gene=SEC16A
GCN1	GCN1 Activator Of EIF2AK4	Protein Coding	37	GC12M120128	0.351728	https://www.genecards.org/cgi-bin/carddisp.pl?gene=GCN1
H2BC11	H2B Clustered Histone 11	Protein Coding	37	GC06M068889	0.351728	https://www.genecards.org/cgi-bin/carddisp.pl?gene=H2BC11
H4C1	H4 Clustered Histone 1	Protein Coding	37	GC06P087450	0.351728	https://www.genecards.org/cgi-bin/carddisp.pl?gene=H4C1
H4C2	H4 Clustered Histone 2	Protein Coding	37	GC06M026026	0.351728	https://www.genecards.org/cgi-bin/carddisp.pl?gene=H4C2
H4C3	H4 Clustered Histone 3	Protein Coding	37	GC06P087456	0.351728	https://www.genecards.org/cgi-bin/carddisp.pl?gene=H4C3
H4C11	H4 Clustered Histone 11	Protein Coding	36	GC06P087552	0.351728	https://www.genecards.org/cgi-bin/carddisp.pl?gene=H4C11
H4C8	H4 Clustered Histone 8	Protein Coding	36	GC06M069813	0.351728	https://www.genecards.org/cgi-bin/carddisp.pl?gene=H4C8
H4C9	H4 Clustered Histone 9	Protein Coding	36	GC06P088608	0.351728	https://www.genecards.org/cgi-bin/carddisp.pl?gene=H4C9
IGHG1	Immunoglobulin Heavy Constant Gamma 1 (G1m Marker)	Protein Coding	36	GC14M105736	0.351728	https://www.genecards.org/cgi-bin/carddisp.pl?gene=IGHG1
H4C12	H4 Clustered Histone 12	Protein Coding	35	GC06M069809	0.351728	https://www.genecards.org/cgi-bin/carddisp.pl?gene=H4C12
H4C13	H4 Clustered Histone 13	Protein Coding	34	GC06M069810	0.351728	https://www.genecards.org/cgi-bin/carddisp.pl?gene=H4C13
H4C14	H4 Clustered Histone 14	Protein Coding	34	GC01P149832	0.351728	https://www.genecards.org/cgi-bin/carddisp.pl?gene=H4C14
H4C4	H4 Clustered Histone 4	Protein Coding	34	GC06M069811	0.351728	https://www.genecards.org/cgi-bin/carddisp.pl?gene=H4C4
H4C5	H4 Clustered Histone 5	Protein Coding	34	GC06P088606	0.351728	https://www.genecards.org/cgi-bin/carddisp.pl?gene=H4C5
QARS1	Glutaminyl-TRNA Synthetase 1	Protein Coding	34	GC03M051377	0.351728	https://www.genecards.org/cgi-bin/carddisp.pl?gene=QARS1
H2BC18	H2B Clustered Histone 18	Protein Coding	33	GC01M152323	0.351728	https://www.genecards.org/cgi-bin/carddisp.pl?gene=H2BC18
H4C6	H4 Clustered Histone 6	Protein Coding	33	GC06P088607	0.351728	https://www.genecards.org/cgi-bin/carddisp.pl?gene=H4C6
IGHG4	Immunoglobulin Heavy Constant Gamma 4 (G4m Marker)	Protein Coding	32	GC14M113014	0.351728	https://www.genecards.org/cgi-bin/carddisp.pl?gene=IGHG4
H4C15	H4 Clustered Histone 15	Protein Coding	30	GC01M152335	0.351728	https://www.genecards.org/cgi-bin/carddisp.pl?gene=H4C15
MIR30C1	MicroRNA 30c-1	RNA Gene	23	GC01P040757	0.351728	https://www.genecards.org/cgi-bin/carddisp.pl?gene=MIR30C1
MIR331	MicroRNA 331	RNA Gene	22	GC12P095308	0.351728	https://www.genecards.org/cgi-bin/carddisp.pl?gene=MIR331
MIR873	MicroRNA 873	RNA Gene	19	GC09M028880	0.351728	https://www.genecards.org/cgi-bin/carddisp.pl?gene=MIR873
RPL17-C18orf32	RPL17-C18orf32 Readthrough	Protein Coding	19	GC18M049481	0.351728	https://www.genecards.org/cgi-bin/carddisp.pl?gene=RPL17-C18orf32
LOC110806263	TERT 5' Regulatory Region	Biological Region	4	GC05P001294	0.351728	https://www.genecards.org/cgi-bin/carddisp.pl?gene=LOC110806263
AKT1	AKT Serine/Threonine Kinase 1	Protein Coding	56	GC14M104769	0.331613	https://www.genecards.org/cgi-bin/carddisp.pl?gene=AKT1
MMP9	Matrix Metallopeptidase 9	Protein Coding	56	GC20P046008	0.331613	https://www.genecards.org/cgi-bin/carddisp.pl?gene=MMP9
MMP2	Matrix Metallopeptidase 2	Protein Coding	55	GC16P055390	0.331613	https://www.genecards.org/cgi-bin/carddisp.pl?gene=MMP2
PRKCD	Protein Kinase C Delta	Protein Coding	55	GC03P053156	0.331613	https://www.genecards.org/cgi-bin/carddisp.pl?gene=PRKCD
PTEN	Phosphatase And Tensin Homolog	Protein Coding	54	GC10P093576	0.331613	https://www.genecards.org/cgi-bin/carddisp.pl?gene=PTEN
C3	Complement C3	Protein Coding	52	GC19M006677	0.331613	https://www.genecards.org/cgi-bin/carddisp.pl?gene=C3
FOXO1	Forkhead Box O1	Protein Coding	51	GC13M040555	0.331613	https://www.genecards.org/cgi-bin/carddisp.pl?gene=FOXO1
GRN	Granulin Precursor	Protein Coding	51	GC17P044345	0.331613	https://www.genecards.org/cgi-bin/carddisp.pl?gene=GRN
GLP1R	Glucagon Like Peptide 1 Receptor	Protein Coding	50	GC06P039048	0.331613	https://www.genecards.org/cgi-bin/carddisp.pl?gene=GLP1R
PRKAA1	Protein Kinase AMP-Activated Catalytic Subunit Alpha 1	Protein Coding	50	GC05M040759	0.331613	https://www.genecards.org/cgi-bin/carddisp.pl?gene=PRKAA1
RDH5	Retinol Dehydrogenase 5	Protein Coding	50	GC12P055720	0.331613	https://www.genecards.org/cgi-bin/carddisp.pl?gene=RDH5
BIRC5	Baculoviral IAP Repeat Containing 5	Protein Coding	48	GC17P078214	0.331613	https://www.genecards.org/cgi-bin/carddisp.pl?gene=BIRC5
CYP2C8	Cytochrome P450 Family 2 Subfamily C Member 8	Protein Coding	48	GC10M095038	0.331613	https://www.genecards.org/cgi-bin/carddisp.pl?gene=CYP2C8
PTPRD	Protein Tyrosine Phosphatase Receptor Type D	Protein Coding	48	GC09M008307	0.331613	https://www.genecards.org/cgi-bin/carddisp.pl?gene=PTPRD
SLC40A1	Solute Carrier Family 40 Member 1	Protein Coding	48	GC02M189560	0.331613	https://www.genecards.org/cgi-bin/carddisp.pl?gene=SLC40A1
TRAF6	TNF Receptor Associated Factor 6	Protein Coding	48	GC11M036467	0.331613	https://www.genecards.org/cgi-bin/carddisp.pl?gene=TRAF6
AVP	Arginine Vasopressin	Protein Coding	47	GC20M003082	0.331613	https://www.genecards.org/cgi-bin/carddisp.pl?gene=AVP
AZGP1	Alpha-2-Glycoprotein 1, Zinc-Binding	Protein Coding	47	GC07M099967	0.331613	https://www.genecards.org/cgi-bin/carddisp.pl?gene=AZGP1
FOXA2	Forkhead Box A2	Protein Coding	47	GC20M022581	0.331613	https://www.genecards.org/cgi-bin/carddisp.pl?gene=FOXA2
IGFBP2	Insulin Like Growth Factor Binding Protein 2	Protein Coding	47	GC02P216632	0.331613	https://www.genecards.org/cgi-bin/carddisp.pl?gene=IGFBP2
IL21	Interleukin 21	Protein Coding	47	GC04M122612	0.331613	https://www.genecards.org/cgi-bin/carddisp.pl?gene=IL21
PLTP	Phospholipid Transfer Protein	Protein Coding	47	GC20M045898	0.331613	https://www.genecards.org/cgi-bin/carddisp.pl?gene=PLTP
OSM	Oncostatin M	Protein Coding	46	GC22M030262	0.331613	https://www.genecards.org/cgi-bin/carddisp.pl?gene=OSM
CYP7A1	Cytochrome P450 Family 7 Subfamily A Member 1	Protein Coding	45	GC08M058476	0.331613	https://www.genecards.org/cgi-bin/carddisp.pl?gene=CYP7A1
GDF11	Growth Differentiation Factor 11	Protein Coding	45	GC12P055743	0.331613	https://www.genecards.org/cgi-bin/carddisp.pl?gene=GDF11
TIMP2	TIMP Metallopeptidase Inhibitor 2	Protein Coding	45	GC17M078852	0.331613	https://www.genecards.org/cgi-bin/carddisp.pl?gene=TIMP2
LUM	Lumican	Protein Coding	44	GC12M091102	0.331613	https://www.genecards.org/cgi-bin/carddisp.pl?gene=LUM
GRHL2	Grainyhead Like Transcription Factor 2	Protein Coding	43	GC08P101492	0.331613	https://www.genecards.org/cgi-bin/carddisp.pl?gene=GRHL2
POLR2D	RNA Polymerase II Subunit D	Protein Coding	43	GC02M128281	0.331613	https://www.genecards.org/cgi-bin/carddisp.pl?gene=POLR2D
SENP3	SUMO Specific Peptidase 3	Protein Coding	42	GC17P011458	0.331613	https://www.genecards.org/cgi-bin/carddisp.pl?gene=SENP3
MAVS	Mitochondrial Antiviral Signaling Protein	Protein Coding	41	GC20P004406	0.331613	https://www.genecards.org/cgi-bin/carddisp.pl?gene=MAVS
RGN	Regucalcin	Protein Coding	41	GC0XP047622	0.331613	https://www.genecards.org/cgi-bin/carddisp.pl?gene=RGN
XPO4	Exportin 4	Protein Coding	40	GC13M020777	0.331613	https://www.genecards.org/cgi-bin/carddisp.pl?gene=XPO4
ONECUT2	One Cut Homeobox 2	Protein Coding	39	GC18P057436	0.331613	https://www.genecards.org/cgi-bin/carddisp.pl?gene=ONECUT2
IFNL3	Interferon Lambda 3	Protein Coding	38	GC19M039243	0.331613	https://www.genecards.org/cgi-bin/carddisp.pl?gene=IFNL3
MTARC1	Mitochondrial Amidoxime Reducing Component 1	Protein Coding	32	GC01P220788	0.331613	https://www.genecards.org/cgi-bin/carddisp.pl?gene=MTARC1
MIR29B1	MicroRNA 29b-1	RNA Gene	23	GC07M130877	0.331613	https://www.genecards.org/cgi-bin/carddisp.pl?gene=MIR29B1
MIR631	MicroRNA 631	RNA Gene	18	GC15M075353	0.331613	https://www.genecards.org/cgi-bin/carddisp.pl?gene=MIR631
CCAT1	Colon Cancer Associated Transcript 1	RNA Gene	16	GC08M127207	0.331613	https://www.genecards.org/cgi-bin/carddisp.pl?gene=CCAT1
CDK4	Cyclin Dependent Kinase 4	Protein Coding	56	GC12M057752	0.310195	https://www.genecards.org/cgi-bin/carddisp.pl?gene=CDK4
MERTK	MER Proto-Oncogene, Tyrosine Kinase	Protein Coding	55	GC02P111898	0.310195	https://www.genecards.org/cgi-bin/carddisp.pl?gene=MERTK
NGF	Nerve Growth Factor	Protein Coding	54	GC01M115285	0.310195	https://www.genecards.org/cgi-bin/carddisp.pl?gene=NGF
CD40	CD40 Molecule	Protein Coding	52	GC20P046118	0.310195	https://www.genecards.org/cgi-bin/carddisp.pl?gene=CD40
CD40LG	CD40 Ligand	Protein Coding	52	GC0XP136649	0.310195	https://www.genecards.org/cgi-bin/carddisp.pl?gene=CD40LG
ROCK1	Rho Associated Coiled-Coil Containing Protein Kinase 1	Protein Coding	52	GC18M020946	0.310195	https://www.genecards.org/cgi-bin/carddisp.pl?gene=ROCK1
RUNX1	RUNX Family Transcription Factor 1	Protein Coding	51	GC21M034787	0.310195	https://www.genecards.org/cgi-bin/carddisp.pl?gene=RUNX1
VEGFA	Vascular Endothelial Growth Factor A	Protein Coding	51	GC06P043770	0.310195	https://www.genecards.org/cgi-bin/carddisp.pl?gene=VEGFA
HSP90AB1	Heat Shock Protein 90 Alpha Family Class B Member 1	Protein Coding	50	GC06P044246	0.310195	https://www.genecards.org/cgi-bin/carddisp.pl?gene=HSP90AB1
XDH	Xanthine Dehydrogenase	Protein Coding	50	GC02M031334	0.310195	https://www.genecards.org/cgi-bin/carddisp.pl?gene=XDH
DCLK1	Doublecortin Like Kinase 1	Protein Coding	48	GC13M035768	0.310195	https://www.genecards.org/cgi-bin/carddisp.pl?gene=DCLK1
PEPD	Peptidase D	Protein Coding	48	GC19M033386	0.310195	https://www.genecards.org/cgi-bin/carddisp.pl?gene=PEPD
SELP	Selectin P	Protein Coding	48	GC01M169558	0.310195	https://www.genecards.org/cgi-bin/carddisp.pl?gene=SELP
TNFSF10	TNF Superfamily Member 10	Protein Coding	47	GC03M172505	0.310195	https://www.genecards.org/cgi-bin/carddisp.pl?gene=TNFSF10
E2F1	E2F Transcription Factor 1	Protein Coding	45	GC20M033675	0.310195	https://www.genecards.org/cgi-bin/carddisp.pl?gene=E2F1
IGFBP5	Insulin Like Growth Factor Binding Protein 5	Protein Coding	45	GC02M216672	0.310195	https://www.genecards.org/cgi-bin/carddisp.pl?gene=IGFBP5
PTPRU	Protein Tyrosine Phosphatase Receptor Type U	Protein Coding	45	GC01P029236	0.310195	https://www.genecards.org/cgi-bin/carddisp.pl?gene=PTPRU
RHBDF2	Rhomboid 5 Homolog 2	Protein Coding	45	GC17M076470	0.310195	https://www.genecards.org/cgi-bin/carddisp.pl?gene=RHBDF2
USP4	Ubiquitin Specific Peptidase 4	Protein Coding	45	GC03M049277	0.310195	https://www.genecards.org/cgi-bin/carddisp.pl?gene=USP4
HS3ST1	Heparan Sulfate-Glucosamine 3-Sulfotransferase 1	Protein Coding	43	GC04M011394	0.310195	https://www.genecards.org/cgi-bin/carddisp.pl?gene=HS3ST1
NUCB2	Nucleobindin 2	Protein Coding	43	GC11P017336	0.310195	https://www.genecards.org/cgi-bin/carddisp.pl?gene=NUCB2
GSTK1	Glutathione S-Transferase Kappa 1	Protein Coding	42	GC07P148812	0.310195	https://www.genecards.org/cgi-bin/carddisp.pl?gene=GSTK1
ADAMTS9	ADAM Metallopeptidase With Thrombospondin Type 1 Motif 9	Protein Coding	41	GC03M064501	0.310195	https://www.genecards.org/cgi-bin/carddisp.pl?gene=ADAMTS9
BMP8B	Bone Morphogenetic Protein 8b	Protein Coding	41	GC01M039757	0.310195	https://www.genecards.org/cgi-bin/carddisp.pl?gene=BMP8B
C1QTNF3	C1q And TNF Related 3	Protein Coding	40	GC05M034017	0.310195	https://www.genecards.org/cgi-bin/carddisp.pl?gene=C1QTNF3
ZBTB7A	Zinc Finger And BTB Domain Containing 7A	Protein Coding	40	GC19M006067	0.310195	https://www.genecards.org/cgi-bin/carddisp.pl?gene=ZBTB7A
FAM3A	FAM3 Metabolism Regulating Signaling Molecule A	Protein Coding	38	GC0XM154506	0.310195	https://www.genecards.org/cgi-bin/carddisp.pl?gene=FAM3A
YIPF1	Yip1 Domain Family Member 1	Protein Coding	38	GC01M053851	0.310195	https://www.genecards.org/cgi-bin/carddisp.pl?gene=YIPF1
TAFA5	TAFA Chemokine Like Family Member 5	Protein Coding	34	GC22P048490	0.310195	https://www.genecards.org/cgi-bin/carddisp.pl?gene=TAFA5
H19	H19 Imprinted Maternally Expressed Transcript	RNA Gene	30	GC11M001995	0.310195	https://www.genecards.org/cgi-bin/carddisp.pl?gene=H19
MIR146A	MicroRNA 146a	RNA Gene	25	GC05P160485	0.310195	https://www.genecards.org/cgi-bin/carddisp.pl?gene=MIR146A
HSP90AA2P	Heat Shock Protein 90 Alpha Family Class A Member 2, Pseudogene	Pseudogene	20	GC11M027888	0.310195	https://www.genecards.org/cgi-bin/carddisp.pl?gene=HSP90AA2P
MIR103A2	MicroRNA 103a-2	RNA Gene	20	GC20P003917	0.310195	https://www.genecards.org/cgi-bin/carddisp.pl?gene=MIR103A2
MIR181A1	MicroRNA 181a-1	RNA Gene	20	GC01M198860	0.310195	https://www.genecards.org/cgi-bin/carddisp.pl?gene=MIR181A1
MIR190B	MicroRNA 190b	RNA Gene	19	GC01M154193	0.310195	https://www.genecards.org/cgi-bin/carddisp.pl?gene=MIR190B
MIR1296	MicroRNA 1296	RNA Gene	18	GC10M063372	0.310195	https://www.genecards.org/cgi-bin/carddisp.pl?gene=MIR1296
MIR103B1	MicroRNA 103b-1	RNA Gene	11	GC05P168560	0.310195	https://www.genecards.org/cgi-bin/carddisp.pl?gene=MIR103B1
MIR103B2	MicroRNA 103b-2	RNA Gene	11	GC20M003899	0.310195	https://www.genecards.org/cgi-bin/carddisp.pl?gene=MIR103B2
CDH2	Cadherin 2	Protein Coding	55	GC18M027950	0.287185	https://www.genecards.org/cgi-bin/carddisp.pl?gene=CDH2
APP	Amyloid Beta Precursor Protein	Protein Coding	54	GC21M025880	0.287185	https://www.genecards.org/cgi-bin/carddisp.pl?gene=APP
FLT1	Fms Related Receptor Tyrosine Kinase 1	Protein Coding	54	GC13M028300	0.287185	https://www.genecards.org/cgi-bin/carddisp.pl?gene=FLT1
TNFSF11	TNF Superfamily Member 11	Protein Coding	54	GC13P042562	0.287185	https://www.genecards.org/cgi-bin/carddisp.pl?gene=TNFSF11
COL1A1	Collagen Type I Alpha 1 Chain	Protein Coding	52	GC17M050248	0.287185	https://www.genecards.org/cgi-bin/carddisp.pl?gene=COL1A1
SPARC	Secreted Protein Acidic And Cysteine Rich	Protein Coding	52	GC05M151661	0.287185	https://www.genecards.org/cgi-bin/carddisp.pl?gene=SPARC
CDKN1A	Cyclin Dependent Kinase Inhibitor 1A	Protein Coding	51	GC06P087904	0.287185	https://www.genecards.org/cgi-bin/carddisp.pl?gene=CDKN1A
CREB1	CAMP Responsive Element Binding Protein 1	Protein Coding	51	GC02P207529	0.287185	https://www.genecards.org/cgi-bin/carddisp.pl?gene=CREB1
CYBB	Cytochrome B-245 Beta Chain	Protein Coding	51	GC0XP037780	0.287185	https://www.genecards.org/cgi-bin/carddisp.pl?gene=CYBB
FGA	Fibrinogen Alpha Chain	Protein Coding	51	GC04M154583	0.287185	https://www.genecards.org/cgi-bin/carddisp.pl?gene=FGA
PKM	Pyruvate Kinase M1/2	Protein Coding	51	GC15M072199	0.287185	https://www.genecards.org/cgi-bin/carddisp.pl?gene=PKM
PRKCE	Protein Kinase C Epsilon	Protein Coding	51	GC02P045651	0.287185	https://www.genecards.org/cgi-bin/carddisp.pl?gene=PRKCE
PRNP	Prion Protein	Protein Coding	51	GC20P004686	0.287185	https://www.genecards.org/cgi-bin/carddisp.pl?gene=PRNP
CES1	Carboxylesterase 1	Protein Coding	50	GC16M055836	0.287185	https://www.genecards.org/cgi-bin/carddisp.pl?gene=CES1
KL	Klotho	Protein Coding	50	GC13P033016	0.287185	https://www.genecards.org/cgi-bin/carddisp.pl?gene=KL
FMO3	Flavin Containing Dimethylaniline Monoxygenase 3	Protein Coding	49	GC01P171090	0.287185	https://www.genecards.org/cgi-bin/carddisp.pl?gene=FMO3
GSS	Glutathione Synthetase	Protein Coding	49	GC20M034928	0.287185	https://www.genecards.org/cgi-bin/carddisp.pl?gene=GSS
HMGB1	High Mobility Group Box 1	Protein Coding	49	GC13M030456	0.287185	https://www.genecards.org/cgi-bin/carddisp.pl?gene=HMGB1
LPIN1	Lipin 1	Protein Coding	49	GC02P011677	0.287185	https://www.genecards.org/cgi-bin/carddisp.pl?gene=LPIN1
PLIN1	Perilipin 1	Protein Coding	49	GC15M089664	0.287185	https://www.genecards.org/cgi-bin/carddisp.pl?gene=PLIN1
SLC25A13	Solute Carrier Family 25 Member 13	Protein Coding	49	GC07M096120	0.287185	https://www.genecards.org/cgi-bin/carddisp.pl?gene=SLC25A13
BCAT1	Branched Chain Amino Acid Transaminase 1	Protein Coding	48	GC12M024732	0.287185	https://www.genecards.org/cgi-bin/carddisp.pl?gene=BCAT1
CCR2	C-C Motif Chemokine Receptor 2	Protein Coding	48	GC03P047181	0.287185	https://www.genecards.org/cgi-bin/carddisp.pl?gene=CCR2
CTSS	Cathepsin S	Protein Coding	48	GC01M150730	0.287185	https://www.genecards.org/cgi-bin/carddisp.pl?gene=CTSS
ECHS1	Enoyl-CoA Hydratase, Short Chain 1	Protein Coding	48	GC10M133362	0.287185	https://www.genecards.org/cgi-bin/carddisp.pl?gene=ECHS1
FPR2	Formyl Peptide Receptor 2	Protein Coding	48	GC19P051752	0.287185	https://www.genecards.org/cgi-bin/carddisp.pl?gene=FPR2
KHK	Ketohexokinase	Protein Coding	48	GC02P027086	0.287185	https://www.genecards.org/cgi-bin/carddisp.pl?gene=KHK
TET2	Tet Methylcytosine Dioxygenase 2	Protein Coding	48	GC04P105145	0.287185	https://www.genecards.org/cgi-bin/carddisp.pl?gene=TET2
ALOX12	Arachidonate 12-Lipoxygenase, 12S Type	Protein Coding	47	GC17P006995	0.287185	https://www.genecards.org/cgi-bin/carddisp.pl?gene=ALOX12
CNR2	Cannabinoid Receptor 2	Protein Coding	47	GC01M023870	0.287185	https://www.genecards.org/cgi-bin/carddisp.pl?gene=CNR2
IRF3	Interferon Regulatory Factor 3	Protein Coding	47	GC19M049659	0.287185	https://www.genecards.org/cgi-bin/carddisp.pl?gene=IRF3
LTBP3	Latent Transforming Growth Factor Beta Binding Protein 3	Protein Coding	47	GC11M065538	0.287185	https://www.genecards.org/cgi-bin/carddisp.pl?gene=LTBP3
TLL1	Tolloid Like 1	Protein Coding	47	GC04P165873	0.287185	https://www.genecards.org/cgi-bin/carddisp.pl?gene=TLL1
TLR6	Toll Like Receptor 6	Protein Coding	47	GC04M038828	0.287185	https://www.genecards.org/cgi-bin/carddisp.pl?gene=TLR6
TJP1	Tight Junction Protein 1	Protein Coding	46	GC15M029699	0.287185	https://www.genecards.org/cgi-bin/carddisp.pl?gene=TJP1
AQP9	Aquaporin 9	Protein Coding	45	GC15P058138	0.287185	https://www.genecards.org/cgi-bin/carddisp.pl?gene=AQP9
CD82	CD82 Molecule	Protein Coding	45	GC11P044586	0.287185	https://www.genecards.org/cgi-bin/carddisp.pl?gene=CD82
E2F2	E2F Transcription Factor 2	Protein Coding	45	GC01M023668	0.287185	https://www.genecards.org/cgi-bin/carddisp.pl?gene=E2F2
RIPK3	Receptor Interacting Serine/Threonine Kinase 3	Protein Coding	45	GC14M024336	0.287185	https://www.genecards.org/cgi-bin/carddisp.pl?gene=RIPK3
CRTC1	CREB Regulated Transcription Coactivator 1	Protein Coding	44	GC19P069338	0.287185	https://www.genecards.org/cgi-bin/carddisp.pl?gene=CRTC1
PALLD	Palladin, Cytoskeletal Associated Protein	Protein Coding	44	GC04P168497	0.287185	https://www.genecards.org/cgi-bin/carddisp.pl?gene=PALLD
SH2B1	SH2B Adaptor Protein 1	Protein Coding	44	GC16P041757	0.287185	https://www.genecards.org/cgi-bin/carddisp.pl?gene=SH2B1
TBX20	T-Box Transcription Factor 20	Protein Coding	44	GC07M035237	0.287185	https://www.genecards.org/cgi-bin/carddisp.pl?gene=TBX20
CHST2	Carbohydrate Sulfotransferase 2	Protein Coding	43	GC03P143119	0.287185	https://www.genecards.org/cgi-bin/carddisp.pl?gene=CHST2
CYP46A1	Cytochrome P450 Family 46 Subfamily A Member 1	Protein Coding	43	GC14P099684	0.287185	https://www.genecards.org/cgi-bin/carddisp.pl?gene=CYP46A1
UBQLN4	Ubiquilin 4	Protein Coding	42	GC01M156033	0.287185	https://www.genecards.org/cgi-bin/carddisp.pl?gene=UBQLN4
FAM3B	FAM3 Metabolism Regulating Signaling Molecule B	Protein Coding	41	GC21P041304	0.287185	https://www.genecards.org/cgi-bin/carddisp.pl?gene=FAM3B
LPA	Lipoprotein(A)	Protein Coding	41	GC06M160531	0.287185	https://www.genecards.org/cgi-bin/carddisp.pl?gene=LPA
OSTF1	Osteoclast Stimulating Factor 1	Protein Coding	41	GC09P075088	0.287185	https://www.genecards.org/cgi-bin/carddisp.pl?gene=OSTF1
SFRP5	Secreted Frizzled Related Protein 5	Protein Coding	41	GC10M097766	0.287185	https://www.genecards.org/cgi-bin/carddisp.pl?gene=SFRP5
TET1	Tet Methylcytosine Dioxygenase 1	Protein Coding	41	GC10P068560	0.287185	https://www.genecards.org/cgi-bin/carddisp.pl?gene=TET1
APOF	Apolipoprotein F	Protein Coding	40	GC12M056959	0.287185	https://www.genecards.org/cgi-bin/carddisp.pl?gene=APOF
GLT8D2	Glycosyltransferase 8 Domain Containing 2	Protein Coding	40	GC12M103988	0.287185	https://www.genecards.org/cgi-bin/carddisp.pl?gene=GLT8D2
IL27	Interleukin 27	Protein Coding	40	GC16M037582	0.287185	https://www.genecards.org/cgi-bin/carddisp.pl?gene=IL27
CILP2	Cartilage Intermediate Layer Protein 2	Protein Coding	38	GC19P019538	0.287185	https://www.genecards.org/cgi-bin/carddisp.pl?gene=CILP2
TMBIM1	Transmembrane BAX Inhibitor Motif Containing 1	Protein Coding	38	GC02M218274	0.287185	https://www.genecards.org/cgi-bin/carddisp.pl?gene=TMBIM1
CELF5	CUGBP Elav-Like Family Member 5	Protein Coding	37	GC19P003224	0.287185	https://www.genecards.org/cgi-bin/carddisp.pl?gene=CELF5
APPL2	Adaptor Protein, Phosphotyrosine Interacting With PH Domain And Leucine Zipper 2	Protein Coding	36	GC12M105173	0.287185	https://www.genecards.org/cgi-bin/carddisp.pl?gene=APPL2
CRACR2A	Calcium Release Activated Channel Regulator 2A	Protein Coding	36	GC12M005336	0.287185	https://www.genecards.org/cgi-bin/carddisp.pl?gene=CRACR2A
HMCES	5-Hydroxymethylcytosine Binding, ES Cell Specific	Protein Coding	36	GC03P129278	0.287185	https://www.genecards.org/cgi-bin/carddisp.pl?gene=HMCES
JRKL	JRK Like	Protein Coding	35	GC11P096389	0.287185	https://www.genecards.org/cgi-bin/carddisp.pl?gene=JRKL
TEX36	Testis Expressed 36	Protein Coding	32	GC10M125576	0.287185	https://www.genecards.org/cgi-bin/carddisp.pl?gene=TEX36
MIR222	MicroRNA 222	RNA Gene	22	GC0XM045747	0.287185	https://www.genecards.org/cgi-bin/carddisp.pl?gene=MIR222
TLCD4-RWDD3	TLCD4-RWDD3 Readthrough	Protein Coding	18	GC01P095119	0.287185	https://www.genecards.org/cgi-bin/carddisp.pl?gene=TLCD4-RWDD3
MIR665	MicroRNA 665	RNA Gene	16	GC14P110464	0.287185	https://www.genecards.org/cgi-bin/carddisp.pl?gene=MIR665
MIR4715	MicroRNA 4715	RNA Gene	15	GC15M025848	0.287185	https://www.genecards.org/cgi-bin/carddisp.pl?gene=MIR4715
RWDD3-DT	RWDD3 Divergent Transcript	RNA Gene	15	GC01M095164	0.287185	https://www.genecards.org/cgi-bin/carddisp.pl?gene=RWDD3-DT
LOC643339	Uncharacterized LOC643339	RNA Gene	11	GC12M093011	0.287185	https://www.genecards.org/cgi-bin/carddisp.pl?gene=LOC643339
RPL41P5	Ribosomal Protein L41 Pseudogene 5	Pseudogene	10	GC12M093083	0.287185	https://www.genecards.org/cgi-bin/carddisp.pl?gene=RPL41P5
MTCO2P1	MT-CO2 Pseudogene 1	Pseudogene	9	GC20M060414	0.287185	https://www.genecards.org/cgi-bin/carddisp.pl?gene=MTCO2P1
RNU6-53P	RNA, U6 Small Nuclear 53, Pseudogene	Pseudogene	9	GC13M028703	0.287185	https://www.genecards.org/cgi-bin/carddisp.pl?gene=RNU6-53P
RPS9P3	Ribosomal Protein S9 Pseudogene 3	Pseudogene	9	GC05P098954	0.287185	https://www.genecards.org/cgi-bin/carddisp.pl?gene=RPS9P3
CKS1BP2	CDC28 Protein Kinase Regulatory Subunit 1B Pseudogene 2	Pseudogene	8	GC10P029697	0.287185	https://www.genecards.org/cgi-bin/carddisp.pl?gene=CKS1BP2
FAM8A6P	Family With Sequence Similarity 8 Member A6, Pseudogene	Pseudogene	8	GC06M134603	0.287185	https://www.genecards.org/cgi-bin/carddisp.pl?gene=FAM8A6P
RPS27P18	Ribosomal Protein S27 Pseudogene 18	Pseudogene	8	GC10M125473	0.287185	https://www.genecards.org/cgi-bin/carddisp.pl?gene=RPS27P18
ASS1P8	Argininosuccinate Synthetase 1 Pseudogene 8	Pseudogene	7	GC04M148526	0.287185	https://www.genecards.org/cgi-bin/carddisp.pl?gene=ASS1P8
MAPRE1P1	MAPRE1 Pseudogene 1	Pseudogene	7	GC08M135623	0.287185	https://www.genecards.org/cgi-bin/carddisp.pl?gene=MAPRE1P1
RPL29P8	Ribosomal Protein L29 Pseudogene 8	Pseudogene	5	GC02M176807	0.287185	https://www.genecards.org/cgi-bin/carddisp.pl?gene=RPL29P8
VN2R20P	Vomeronasal 2 Receptor 20 Pseudogene	Pseudogene	5	GC21P023910	0.287185	https://www.genecards.org/cgi-bin/carddisp.pl?gene=VN2R20P
TGFBR1	Transforming Growth Factor Beta Receptor 1	Protein Coding	56	GC09P099104	0.262163	https://www.genecards.org/cgi-bin/carddisp.pl?gene=TGFBR1
ALK	ALK Receptor Tyrosine Kinase	Protein Coding	54	GC02M029190	0.262163	https://www.genecards.org/cgi-bin/carddisp.pl?gene=ALK
STK11	Serine/Threonine Kinase 11	Protein Coding	53	GC19P001177	0.262163	https://www.genecards.org/cgi-bin/carddisp.pl?gene=STK11
CASP3	Caspase 3	Protein Coding	52	GC04M184627	0.262163	https://www.genecards.org/cgi-bin/carddisp.pl?gene=CASP3
ANGPT2	Angiopoietin 2	Protein Coding	50	GC08M006499	0.262163	https://www.genecards.org/cgi-bin/carddisp.pl?gene=ANGPT2
CYBA	Cytochrome B-245 Alpha Chain	Protein Coding	50	GC16M088643	0.262163	https://www.genecards.org/cgi-bin/carddisp.pl?gene=CYBA
GOT2	Glutamic-Oxaloacetic Transaminase 2	Protein Coding	50	GC16M058707	0.262163	https://www.genecards.org/cgi-bin/carddisp.pl?gene=GOT2
HMGCS2	3-Hydroxy-3-Methylglutaryl-CoA Synthase 2	Protein Coding	50	GC01M119747	0.262163	https://www.genecards.org/cgi-bin/carddisp.pl?gene=HMGCS2
IFIH1	Interferon Induced With Helicase C Domain 1	Protein Coding	50	GC02M162267	0.262163	https://www.genecards.org/cgi-bin/carddisp.pl?gene=IFIH1
MMP7	Matrix Metallopeptidase 7	Protein Coding	50	GC11M102425	0.262163	https://www.genecards.org/cgi-bin/carddisp.pl?gene=MMP7
SIRT2	Sirtuin 2	Protein Coding	50	GC19M038878	0.262163	https://www.genecards.org/cgi-bin/carddisp.pl?gene=SIRT2
STAT5A	Signal Transducer And Activator Of Transcription 5A	Protein Coding	50	GC17P042287	0.262163	https://www.genecards.org/cgi-bin/carddisp.pl?gene=STAT5A
CUL3	Cullin 3	Protein Coding	49	GC02M224470	0.262163	https://www.genecards.org/cgi-bin/carddisp.pl?gene=CUL3
IGFBP7	Insulin Like Growth Factor Binding Protein 7	Protein Coding	49	GC04M057030	0.262163	https://www.genecards.org/cgi-bin/carddisp.pl?gene=IGFBP7
ENPP2	Ectonucleotide Pyrophosphatase/Phosphodiesterase 2	Protein Coding	48	GC08M119556	0.262163	https://www.genecards.org/cgi-bin/carddisp.pl?gene=ENPP2
F3	Coagulation Factor III, Tissue Factor	Protein Coding	48	GC01M094599	0.262163	https://www.genecards.org/cgi-bin/carddisp.pl?gene=F3
GNMT	Glycine N-Methyltransferase	Protein Coding	48	GC06P042960	0.262163	https://www.genecards.org/cgi-bin/carddisp.pl?gene=GNMT
GOT1	Glutamic-Oxaloacetic Transaminase 1	Protein Coding	48	GC10M099396	0.262163	https://www.genecards.org/cgi-bin/carddisp.pl?gene=GOT1
HNF1A	HNF1 Homeobox A	Protein Coding	48	GC12P120978	0.262163	https://www.genecards.org/cgi-bin/carddisp.pl?gene=HNF1A
NEU1	Neuraminidase 1	Protein Coding	48	GC06M031857	0.262163	https://www.genecards.org/cgi-bin/carddisp.pl?gene=NEU1
SERPINF1	Serpin Family F Member 1	Protein Coding	48	GC17P001761	0.262163	https://www.genecards.org/cgi-bin/carddisp.pl?gene=SERPINF1
GDF2	Growth Differentiation Factor 2	Protein Coding	47	GC10P047322	0.262163	https://www.genecards.org/cgi-bin/carddisp.pl?gene=GDF2
NOX4	NADPH Oxidase 4	Protein Coding	47	GC11M089324	0.262163	https://www.genecards.org/cgi-bin/carddisp.pl?gene=NOX4
OGT	O-Linked N-Acetylglucosamine (GlcNAc) Transferase	Protein Coding	47	GC0XP071534	0.262163	https://www.genecards.org/cgi-bin/carddisp.pl?gene=OGT
PRDX5	Peroxiredoxin 5	Protein Coding	47	GC11P064435	0.262163	https://www.genecards.org/cgi-bin/carddisp.pl?gene=PRDX5
TMPRSS6	Transmembrane Serine Protease 6	Protein Coding	47	GC22M059410	0.262163	https://www.genecards.org/cgi-bin/carddisp.pl?gene=TMPRSS6
TREM2	Triggering Receptor Expressed On Myeloid Cells 2	Protein Coding	47	GC06M069402	0.262163	https://www.genecards.org/cgi-bin/carddisp.pl?gene=TREM2
ACTC1	Actin Alpha Cardiac Muscle 1	Protein Coding	46	GC15M034790	0.262163	https://www.genecards.org/cgi-bin/carddisp.pl?gene=ACTC1
USP10	Ubiquitin Specific Peptidase 10	Protein Coding	46	GC16P084702	0.262163	https://www.genecards.org/cgi-bin/carddisp.pl?gene=USP10
AKR1B10	Aldo-Keto Reductase Family 1 Member B10	Protein Coding	45	GC07P134527	0.262163	https://www.genecards.org/cgi-bin/carddisp.pl?gene=AKR1B10
DMGDH	Dimethylglycine Dehydrogenase	Protein Coding	45	GC05M078997	0.262163	https://www.genecards.org/cgi-bin/carddisp.pl?gene=DMGDH
G6PC1	Glucose-6-Phosphatase Catalytic Subunit 1	Protein Coding	45	GC17P059240	0.262163	https://www.genecards.org/cgi-bin/carddisp.pl?gene=G6PC1
STK17B	Serine/Threonine Kinase 17b	Protein Coding	45	GC02M196133	0.262163	https://www.genecards.org/cgi-bin/carddisp.pl?gene=STK17B
NLRP2	NLR Family Pyrin Domain Containing 2	Protein Coding	44	GC19P054953	0.262163	https://www.genecards.org/cgi-bin/carddisp.pl?gene=NLRP2
RGS5	Regulator Of G Protein Signaling 5	Protein Coding	44	GC01M163111	0.262163	https://www.genecards.org/cgi-bin/carddisp.pl?gene=RGS5
ITGB3BP	Integrin Subunit Beta 3 Binding Protein	Protein Coding	43	GC01M063440	0.262163	https://www.genecards.org/cgi-bin/carddisp.pl?gene=ITGB3BP
PHLPP2	PH Domain And Leucine Rich Repeat Protein Phosphatase 2	Protein Coding	43	GC16M071637	0.262163	https://www.genecards.org/cgi-bin/carddisp.pl?gene=PHLPP2
SLC2A8	Solute Carrier Family 2 Member 8	Protein Coding	43	GC09P127398	0.262163	https://www.genecards.org/cgi-bin/carddisp.pl?gene=SLC2A8
TAOK3	TAO Kinase 3	Protein Coding	43	GC12M118149	0.262163	https://www.genecards.org/cgi-bin/carddisp.pl?gene=TAOK3
SLPI	Secretory Leukocyte Peptidase Inhibitor	Protein Coding	42	GC20M045252	0.262163	https://www.genecards.org/cgi-bin/carddisp.pl?gene=SLPI
IL34	Interleukin 34	Protein Coding	41	GC16P072129	0.262163	https://www.genecards.org/cgi-bin/carddisp.pl?gene=IL34
IP6K1	Inositol Hexakisphosphate Kinase 1	Protein Coding	41	GC03M051424	0.262163	https://www.genecards.org/cgi-bin/carddisp.pl?gene=IP6K1
TMBIM6	Transmembrane BAX Inhibitor Motif Containing 6	Protein Coding	40	GC12P049707	0.262163	https://www.genecards.org/cgi-bin/carddisp.pl?gene=TMBIM6
VSIG4	V-Set And Immunoglobulin Domain Containing 4	Protein Coding	40	GC0XM066021	0.262163	https://www.genecards.org/cgi-bin/carddisp.pl?gene=VSIG4
ARRDC3	Arrestin Domain Containing 3	Protein Coding	38	GC05M091368	0.262163	https://www.genecards.org/cgi-bin/carddisp.pl?gene=ARRDC3
CEP192	Centrosomal Protein 192	Protein Coding	38	GC18P017820	0.262163	https://www.genecards.org/cgi-bin/carddisp.pl?gene=CEP192
SEC14L3	SEC14 Like Lipid Binding 3	Protein Coding	38	GC22M030447	0.262163	https://www.genecards.org/cgi-bin/carddisp.pl?gene=SEC14L3
PLIN5	Perilipin 5	Protein Coding	35	GC19M004522	0.262163	https://www.genecards.org/cgi-bin/carddisp.pl?gene=PLIN5
TNFAIP8L2	TNF Alpha Induced Protein 8 Like 2	Protein Coding	33	GC01P151156	0.262163	https://www.genecards.org/cgi-bin/carddisp.pl?gene=TNFAIP8L2
MEG3	Maternally Expressed 3	RNA Gene	28	GC14P110419	0.262163	https://www.genecards.org/cgi-bin/carddisp.pl?gene=MEG3
MIR205	MicroRNA 205	RNA Gene	23	GC01P209432	0.262163	https://www.genecards.org/cgi-bin/carddisp.pl?gene=MIR205
GGT3P	Gamma-Glutamyltransferase 3 Pseudogene	Pseudogene	22	GC22M018773	0.262163	https://www.genecards.org/cgi-bin/carddisp.pl?gene=GGT3P
IFNL4	Interferon Lambda 4 (Gene/Pseudogene)	Protein Coding	22	GC19M039246	0.262163	https://www.genecards.org/cgi-bin/carddisp.pl?gene=IFNL4
LOC110366354	CYP3A4 5' Regulatory Region	Biological Region	2	GC07P099784	0.262163	https://www.genecards.org/cgi-bin/carddisp.pl?gene=LOC110366354
DNMT1	DNA Methyltransferase 1	Protein Coding	55	GC19M010133	0.234486	https://www.genecards.org/cgi-bin/carddisp.pl?gene=DNMT1
GRIA3	Glutamate Ionotropic Receptor AMPA Type Subunit 3	Protein Coding	54	GC0XP123184	0.234486	https://www.genecards.org/cgi-bin/carddisp.pl?gene=GRIA3
HSPB1	Heat Shock Protein Family B (Small) Member 1	Protein Coding	54	GC07P076302	0.234486	https://www.genecards.org/cgi-bin/carddisp.pl?gene=HSPB1
TFRC	Transferrin Receptor	Protein Coding	54	GC03M196031	0.234486	https://www.genecards.org/cgi-bin/carddisp.pl?gene=TFRC
ELANE	Elastase, Neutrophil Expressed	Protein Coding	53	GC19P003232	0.234486	https://www.genecards.org/cgi-bin/carddisp.pl?gene=ELANE
CTLA4	Cytotoxic T-Lymphocyte Associated Protein 4	Protein Coding	52	GC02P203854	0.234486	https://www.genecards.org/cgi-bin/carddisp.pl?gene=CTLA4
EPAS1	Endothelial PAS Domain Protein 1	Protein Coding	52	GC02P046293	0.234486	https://www.genecards.org/cgi-bin/carddisp.pl?gene=EPAS1
WNT5A	Wnt Family Member 5A	Protein Coding	52	GC03M055465	0.234486	https://www.genecards.org/cgi-bin/carddisp.pl?gene=WNT5A
DICER1	Dicer 1, Ribonuclease III	Protein Coding	51	GC14M095086	0.234486	https://www.genecards.org/cgi-bin/carddisp.pl?gene=DICER1
HTR2A	5-Hydroxytryptamine Receptor 2A	Protein Coding	51	GC13M046831	0.234486	https://www.genecards.org/cgi-bin/carddisp.pl?gene=HTR2A
LRRK2	Leucine Rich Repeat Kinase 2	Protein Coding	51	GC12P040196	0.234486	https://www.genecards.org/cgi-bin/carddisp.pl?gene=LRRK2
MAPK12	Mitogen-Activated Protein Kinase 12	Protein Coding	51	GC22M059568	0.234486	https://www.genecards.org/cgi-bin/carddisp.pl?gene=MAPK12
MAPK13	Mitogen-Activated Protein Kinase 13	Protein Coding	51	GC06P087897	0.234486	https://www.genecards.org/cgi-bin/carddisp.pl?gene=MAPK13
ABCB4	ATP Binding Cassette Subfamily B Member 4	Protein Coding	50	GC07M087365	0.234486	https://www.genecards.org/cgi-bin/carddisp.pl?gene=ABCB4
AHR	Aryl Hydrocarbon Receptor	Protein Coding	50	GC07P016916	0.234486	https://www.genecards.org/cgi-bin/carddisp.pl?gene=AHR
ATP7B	ATPase Copper Transporting Beta	Protein Coding	50	GC13M051930	0.234486	https://www.genecards.org/cgi-bin/carddisp.pl?gene=ATP7B
CDK8	Cyclin Dependent Kinase 8	Protein Coding	50	GC13P026254	0.234486	https://www.genecards.org/cgi-bin/carddisp.pl?gene=CDK8
CNR1	Cannabinoid Receptor 1	Protein Coding	50	GC06M088139	0.234486	https://www.genecards.org/cgi-bin/carddisp.pl?gene=CNR1
DKK1	Dickkopf WNT Signaling Pathway Inhibitor 1	Protein Coding	50	GC10P052314	0.234486	https://www.genecards.org/cgi-bin/carddisp.pl?gene=DKK1
LCAT	Lecithin-Cholesterol Acyltransferase	Protein Coding	50	GC16M067939	0.234486	https://www.genecards.org/cgi-bin/carddisp.pl?gene=LCAT
LOX	Lysyl Oxidase	Protein Coding	50	GC05M122063	0.234486	https://www.genecards.org/cgi-bin/carddisp.pl?gene=LOX
ITPR2	Inositol 1,4,5-Trisphosphate Receptor Type 2	Protein Coding	49	GC12M026336	0.234486	https://www.genecards.org/cgi-bin/carddisp.pl?gene=ITPR2
ACADM	Acyl-CoA Dehydrogenase Medium Chain	Protein Coding	48	GC01P075724	0.234486	https://www.genecards.org/cgi-bin/carddisp.pl?gene=ACADM
GFER	Growth Factor, Augmenter Of Liver Regeneration	Protein Coding	48	GC16P001984	0.234486	https://www.genecards.org/cgi-bin/carddisp.pl?gene=GFER
TFR2	Transferrin Receptor 2	Protein Coding	48	GC07M100620	0.234486	https://www.genecards.org/cgi-bin/carddisp.pl?gene=TFR2
UBE2D1	Ubiquitin Conjugating Enzyme E2 D1	Protein Coding	48	GC10P058334	0.234486	https://www.genecards.org/cgi-bin/carddisp.pl?gene=UBE2D1
AKR1A1	Aldo-Keto Reductase Family 1 Member A1	Protein Coding	47	GC01P045550	0.234486	https://www.genecards.org/cgi-bin/carddisp.pl?gene=AKR1A1
CD274	CD274 Molecule	Protein Coding	47	GC09P005450	0.234486	https://www.genecards.org/cgi-bin/carddisp.pl?gene=CD274
GPC4	Glypican 4	Protein Coding	47	GC0XM133300	0.234486	https://www.genecards.org/cgi-bin/carddisp.pl?gene=GPC4
GRK2	G Protein-Coupled Receptor Kinase 2	Protein Coding	47	GC11P067266	0.234486	https://www.genecards.org/cgi-bin/carddisp.pl?gene=GRK2
HBB	Hemoglobin Subunit Beta	Protein Coding	47	GC11M006673	0.234486	https://www.genecards.org/cgi-bin/carddisp.pl?gene=HBB
LBP	Lipopolysaccharide Binding Protein	Protein Coding	47	GC20P038346	0.234486	https://www.genecards.org/cgi-bin/carddisp.pl?gene=LBP
SFRP4	Secreted Frizzled Related Protein 4	Protein Coding	47	GC07M037912	0.234486	https://www.genecards.org/cgi-bin/carddisp.pl?gene=SFRP4
CYP4F2	Cytochrome P450 Family 4 Subfamily F Member 2	Protein Coding	46	GC19M015878	0.234486	https://www.genecards.org/cgi-bin/carddisp.pl?gene=CYP4F2
DROSHA	Drosha Ribonuclease III	Protein Coding	46	GC05M031401	0.234486	https://www.genecards.org/cgi-bin/carddisp.pl?gene=DROSHA
NLRC4	NLR Family CARD Domain Containing 4	Protein Coding	46	GC02M032224	0.234486	https://www.genecards.org/cgi-bin/carddisp.pl?gene=NLRC4
LOXL1	Lysyl Oxidase Like 1	Protein Coding	45	GC15P073925	0.234486	https://www.genecards.org/cgi-bin/carddisp.pl?gene=LOXL1
SMOC2	SPARC Related Modular Calcium Binding 2	Protein Coding	45	GC06P168441	0.234486	https://www.genecards.org/cgi-bin/carddisp.pl?gene=SMOC2
AIM2	Absent In Melanoma 2	Protein Coding	44	GC01M159062	0.234486	https://www.genecards.org/cgi-bin/carddisp.pl?gene=AIM2
CCL21	C-C Motif Chemokine Ligand 21	Protein Coding	44	GC09M034709	0.234486	https://www.genecards.org/cgi-bin/carddisp.pl?gene=CCL21
DGCR8	DGCR8 Microprocessor Complex Subunit	Protein Coding	44	GC22P020080	0.234486	https://www.genecards.org/cgi-bin/carddisp.pl?gene=DGCR8
NPEPPS	Aminopeptidase Puromycin Sensitive	Protein Coding	44	GC17P047522	0.234486	https://www.genecards.org/cgi-bin/carddisp.pl?gene=NPEPPS
PLIN3	Perilipin 3	Protein Coding	44	GC19M006106	0.234486	https://www.genecards.org/cgi-bin/carddisp.pl?gene=PLIN3
TFEB	Transcription Factor EB	Protein Coding	44	GC06M069415	0.234486	https://www.genecards.org/cgi-bin/carddisp.pl?gene=TFEB
ATG3	Autophagy Related 3	Protein Coding	43	GC03M112532	0.234486	https://www.genecards.org/cgi-bin/carddisp.pl?gene=ATG3
CCNC	Cyclin C	Protein Coding	43	GC06M099542	0.234486	https://www.genecards.org/cgi-bin/carddisp.pl?gene=CCNC
HKDC1	Hexokinase Domain Containing 1	Protein Coding	43	GC10P069220	0.234486	https://www.genecards.org/cgi-bin/carddisp.pl?gene=HKDC1
IL25	Interleukin 25	Protein Coding	43	GC14P033600	0.234486	https://www.genecards.org/cgi-bin/carddisp.pl?gene=IL25
PRMT3	Protein Arginine Methyltransferase 3	Protein Coding	43	GC11P020409	0.234486	https://www.genecards.org/cgi-bin/carddisp.pl?gene=PRMT3
SERPINB3	Serpin Family B Member 3	Protein Coding	43	GC18M063655	0.234486	https://www.genecards.org/cgi-bin/carddisp.pl?gene=SERPINB3
USP18	Ubiquitin Specific Peptidase 18	Protein Coding	43	GC22P039677	0.234486	https://www.genecards.org/cgi-bin/carddisp.pl?gene=USP18
TTF2	Transcription Termination Factor 2	Protein Coding	42	GC01P117060	0.234486	https://www.genecards.org/cgi-bin/carddisp.pl?gene=TTF2
LAMP3	Lysosomal Associated Membrane Protein 3	Protein Coding	41	GC03M183122	0.234486	https://www.genecards.org/cgi-bin/carddisp.pl?gene=LAMP3
MICA	MHC Class I Polypeptide-Related Sequence A	Protein Coding	41	GC06P031399	0.234486	https://www.genecards.org/cgi-bin/carddisp.pl?gene=MICA
WBP2	WW Domain Binding Protein 2	Protein Coding	41	GC17M075845	0.234486	https://www.genecards.org/cgi-bin/carddisp.pl?gene=WBP2
CARD6	Caspase Recruitment Domain Family Member 6	Protein Coding	40	GC05P040841	0.234486	https://www.genecards.org/cgi-bin/carddisp.pl?gene=CARD6
DUSP14	Dual Specificity Phosphatase 14	Protein Coding	40	GC17P058263	0.234486	https://www.genecards.org/cgi-bin/carddisp.pl?gene=DUSP14
TRIM31	Tripartite Motif Containing 31	Protein Coding	40	GC06M069109	0.234486	https://www.genecards.org/cgi-bin/carddisp.pl?gene=TRIM31
DUSP26	Dual Specificity Phosphatase 26	Protein Coding	39	GC08M033591	0.234486	https://www.genecards.org/cgi-bin/carddisp.pl?gene=DUSP26
REPIN1	Replication Initiator 1	Protein Coding	36	GC07P150368	0.234486	https://www.genecards.org/cgi-bin/carddisp.pl?gene=REPIN1
MT-ND6	Mitochondrially Encoded NADH:Ubiquinone Oxidoreductase Core Subunit 6	Protein Coding	34	GCMTM014151	0.234486	https://www.genecards.org/cgi-bin/carddisp.pl?gene=MT-ND6
MT-CYB	Mitochondrially Encoded Cytochrome B	Protein Coding	33	GCMTP014749	0.234486	https://www.genecards.org/cgi-bin/carddisp.pl?gene=MT-CYB
MIR361	MicroRNA 361	RNA Gene	19	GC0XM085903	0.234486	https://www.genecards.org/cgi-bin/carddisp.pl?gene=MIR361
MDM2	MDM2 Proto-Oncogene	Protein Coding	55	GC12P068808	0.203071	https://www.genecards.org/cgi-bin/carddisp.pl?gene=MDM2
PTPN1	Protein Tyrosine Phosphatase Non-Receptor Type 1	Protein Coding	54	GC20P050510	0.203071	https://www.genecards.org/cgi-bin/carddisp.pl?gene=PTPN1
TGFBR2	Transforming Growth Factor Beta Receptor 2	Protein Coding	54	GC03P030623	0.203071	https://www.genecards.org/cgi-bin/carddisp.pl?gene=TGFBR2
FN1	Fibronectin 1	Protein Coding	52	GC02M215360	0.203071	https://www.genecards.org/cgi-bin/carddisp.pl?gene=FN1
FST	Follistatin	Protein Coding	51	GC05P053480	0.203071	https://www.genecards.org/cgi-bin/carddisp.pl?gene=FST
MYD88	MYD88 Innate Immune Signal Transduction Adaptor	Protein Coding	51	GC03P038144	0.203071	https://www.genecards.org/cgi-bin/carddisp.pl?gene=MYD88
TTR	Transthyretin	Protein Coding	51	GC18P031557	0.203071	https://www.genecards.org/cgi-bin/carddisp.pl?gene=TTR
YY1	YY1 Transcription Factor	Protein Coding	51	GC14P100238	0.203071	https://www.genecards.org/cgi-bin/carddisp.pl?gene=YY1
ABCA1	ATP Binding Cassette Subfamily A Member 1	Protein Coding	50	GC09M104781	0.203071	https://www.genecards.org/cgi-bin/carddisp.pl?gene=ABCA1
HSPA9	Heat Shock Protein Family A (Hsp70) Member 9	Protein Coding	50	GC05M138554	0.203071	https://www.genecards.org/cgi-bin/carddisp.pl?gene=HSPA9
IGFBP3	Insulin Like Growth Factor Binding Protein 3	Protein Coding	50	GC07M045912	0.203071	https://www.genecards.org/cgi-bin/carddisp.pl?gene=IGFBP3
IRF7	Interferon Regulatory Factor 7	Protein Coding	50	GC11M000612	0.203071	https://www.genecards.org/cgi-bin/carddisp.pl?gene=IRF7
JUN	Jun Proto-Oncogene, AP-1 Transcription Factor Subunit	Protein Coding	50	GC01M058780	0.203071	https://www.genecards.org/cgi-bin/carddisp.pl?gene=JUN
LOXL2	Lysyl Oxidase Like 2	Protein Coding	50	GC08M023296	0.203071	https://www.genecards.org/cgi-bin/carddisp.pl?gene=LOXL2
MFN2	Mitofusin 2	Protein Coding	50	GC01P011980	0.203071	https://www.genecards.org/cgi-bin/carddisp.pl?gene=MFN2
NR4A1	Nuclear Receptor Subfamily 4 Group A Member 1	Protein Coding	50	GC12P052022	0.203071	https://www.genecards.org/cgi-bin/carddisp.pl?gene=NR4A1
GPD2	Glycerol-3-Phosphate Dehydrogenase 2	Protein Coding	49	GC02P156401	0.203071	https://www.genecards.org/cgi-bin/carddisp.pl?gene=GPD2
PRKAB1	Protein Kinase AMP-Activated Non-Catalytic Subunit Beta 1	Protein Coding	49	GC12P119632	0.203071	https://www.genecards.org/cgi-bin/carddisp.pl?gene=PRKAB1
A2M	Alpha-2-Macroglobulin	Protein Coding	48	GC12M009067	0.203071	https://www.genecards.org/cgi-bin/carddisp.pl?gene=A2M
AOC3	Amine Oxidase Copper Containing 3	Protein Coding	48	GC17P042851	0.203071	https://www.genecards.org/cgi-bin/carddisp.pl?gene=AOC3
CCL11	C-C Motif Chemokine Ligand 11	Protein Coding	48	GC17P034285	0.203071	https://www.genecards.org/cgi-bin/carddisp.pl?gene=CCL11
CLCN2	Chloride Voltage-Gated Channel 2	Protein Coding	48	GC03M184346	0.203071	https://www.genecards.org/cgi-bin/carddisp.pl?gene=CLCN2
HSPA1A	Heat Shock Protein Family A (Hsp70) Member 1A	Protein Coding	48	GC06P087759	0.203071	https://www.genecards.org/cgi-bin/carddisp.pl?gene=HSPA1A
IL13	Interleukin 13	Protein Coding	48	GC05P132656	0.203071	https://www.genecards.org/cgi-bin/carddisp.pl?gene=IL13
INHBA	Inhibin Subunit Beta A	Protein Coding	48	GC07M041668	0.203071	https://www.genecards.org/cgi-bin/carddisp.pl?gene=INHBA
KDM4B	Lysine Demethylase 4B	Protein Coding	48	GC19P004969	0.203071	https://www.genecards.org/cgi-bin/carddisp.pl?gene=KDM4B
MAP2K4	Mitogen-Activated Protein Kinase Kinase 4	Protein Coding	48	GC17P012020	0.203071	https://www.genecards.org/cgi-bin/carddisp.pl?gene=MAP2K4
SNAI2	Snail Family Transcriptional Repressor 2	Protein Coding	48	GC08M048917	0.203071	https://www.genecards.org/cgi-bin/carddisp.pl?gene=SNAI2
TXNRD2	Thioredoxin Reductase 2	Protein Coding	48	GC22M019863	0.203071	https://www.genecards.org/cgi-bin/carddisp.pl?gene=TXNRD2
IL17A	Interleukin 17A	Protein Coding	47	GC06P052186	0.203071	https://www.genecards.org/cgi-bin/carddisp.pl?gene=IL17A
MAP2K7	Mitogen-Activated Protein Kinase Kinase 7	Protein Coding	47	GC19P007903	0.203071	https://www.genecards.org/cgi-bin/carddisp.pl?gene=MAP2K7
NR1I3	Nuclear Receptor Subfamily 1 Group I Member 3	Protein Coding	47	GC01M161229	0.203071	https://www.genecards.org/cgi-bin/carddisp.pl?gene=NR1I3
TSHB	Thyroid Stimulating Hormone Subunit Beta	Protein Coding	47	GC01P115029	0.203071	https://www.genecards.org/cgi-bin/carddisp.pl?gene=TSHB
UGT1A9	UDP Glucuronosyltransferase Family 1 Member A9	Protein Coding	47	GC02P233671	0.203071	https://www.genecards.org/cgi-bin/carddisp.pl?gene=UGT1A9
AREG	Amphiregulin	Protein Coding	46	GC04P074445	0.203071	https://www.genecards.org/cgi-bin/carddisp.pl?gene=AREG
CES2	Carboxylesterase 2	Protein Coding	46	GC16P066934	0.203071	https://www.genecards.org/cgi-bin/carddisp.pl?gene=CES2
GPR55	G Protein-Coupled Receptor 55	Protein Coding	46	GC02M230907	0.203071	https://www.genecards.org/cgi-bin/carddisp.pl?gene=GPR55
NPC2	NPC Intracellular Cholesterol Transporter 2	Protein Coding	46	GC14M074476	0.203071	https://www.genecards.org/cgi-bin/carddisp.pl?gene=NPC2
PDGFA	Platelet Derived Growth Factor Subunit A	Protein Coding	46	GC07M000497	0.203071	https://www.genecards.org/cgi-bin/carddisp.pl?gene=PDGFA
RAMP3	Receptor Activity Modifying Protein 3	Protein Coding	46	GC07P045163	0.203071	https://www.genecards.org/cgi-bin/carddisp.pl?gene=RAMP3
S100A9	S100 Calcium Binding Protein A9	Protein Coding	46	GC01P153357	0.203071	https://www.genecards.org/cgi-bin/carddisp.pl?gene=S100A9
SHC1	SHC Adaptor Protein 1	Protein Coding	46	GC01M154962	0.203071	https://www.genecards.org/cgi-bin/carddisp.pl?gene=SHC1
SOAT2	Sterol O-Acyltransferase 2	Protein Coding	46	GC12P053103	0.203071	https://www.genecards.org/cgi-bin/carddisp.pl?gene=SOAT2
SOCS2	Suppressor Of Cytokine Signaling 2	Protein Coding	46	GC12P093569	0.203071	https://www.genecards.org/cgi-bin/carddisp.pl?gene=SOCS2
PIK3R3	Phosphoinositide-3-Kinase Regulatory Subunit 3	Protein Coding	45	GC01M046041	0.203071	https://www.genecards.org/cgi-bin/carddisp.pl?gene=PIK3R3
UGT1A4	UDP Glucuronosyltransferase Family 1 Member A4	Protein Coding	45	GC02P233718	0.203071	https://www.genecards.org/cgi-bin/carddisp.pl?gene=UGT1A4
CMKLR1	Chemerin Chemokine-Like Receptor 1	Protein Coding	44	GC12M108288	0.203071	https://www.genecards.org/cgi-bin/carddisp.pl?gene=CMKLR1
HCAR2	Hydroxycarboxylic Acid Receptor 2	Protein Coding	44	GC12M122701	0.203071	https://www.genecards.org/cgi-bin/carddisp.pl?gene=HCAR2
UGT1A10	UDP Glucuronosyltransferase Family 1 Member A10	Protein Coding	44	GC02P233636	0.203071	https://www.genecards.org/cgi-bin/carddisp.pl?gene=UGT1A10
UGT1A6	UDP Glucuronosyltransferase Family 1 Member A6	Protein Coding	44	GC02P233691	0.203071	https://www.genecards.org/cgi-bin/carddisp.pl?gene=UGT1A6
AATF	Apoptosis Antagonizing Transcription Factor	Protein Coding	43	GC17P036948	0.203071	https://www.genecards.org/cgi-bin/carddisp.pl?gene=AATF
CISD2	CDGSH Iron Sulfur Domain 2	Protein Coding	43	GC04P102868	0.203071	https://www.genecards.org/cgi-bin/carddisp.pl?gene=CISD2
PPIG	Peptidylprolyl Isomerase G	Protein Coding	43	GC02P169584	0.203071	https://www.genecards.org/cgi-bin/carddisp.pl?gene=PPIG
TP53BP2	Tumor Protein P53 Binding Protein 2	Protein Coding	43	GC01M223779	0.203071	https://www.genecards.org/cgi-bin/carddisp.pl?gene=TP53BP2
UGT1A7	UDP Glucuronosyltransferase Family 1 Member A7	Protein Coding	43	GC02P233681	0.203071	https://www.genecards.org/cgi-bin/carddisp.pl?gene=UGT1A7
ADA2	Adenosine Deaminase 2	Protein Coding	42	GC22M017207	0.203071	https://www.genecards.org/cgi-bin/carddisp.pl?gene=ADA2
IL1RAPL2	Interleukin 1 Receptor Accessory Protein Like 2	Protein Coding	42	GC0XP104566	0.203071	https://www.genecards.org/cgi-bin/carddisp.pl?gene=IL1RAPL2
LCN1	Lipocalin 1	Protein Coding	42	GC09P135521	0.203071	https://www.genecards.org/cgi-bin/carddisp.pl?gene=LCN1
CWF19L1	CWF19 Like Cell Cycle Control Factor 1	Protein Coding	41	GC10M100232	0.203071	https://www.genecards.org/cgi-bin/carddisp.pl?gene=CWF19L1
ITLN1	Intelectin 1	Protein Coding	41	GC01M160876	0.203071	https://www.genecards.org/cgi-bin/carddisp.pl?gene=ITLN1
KLF3	KLF Transcription Factor 3	Protein Coding	41	GC04P038668	0.203071	https://www.genecards.org/cgi-bin/carddisp.pl?gene=KLF3
PKNOX1	PBX/Knotted 1 Homeobox 1	Protein Coding	41	GC21P042974	0.203071	https://www.genecards.org/cgi-bin/carddisp.pl?gene=PKNOX1
SLC17A9	Solute Carrier Family 17 Member 9	Protein Coding	41	GC20P062952	0.203071	https://www.genecards.org/cgi-bin/carddisp.pl?gene=SLC17A9
UGT1A8	UDP Glucuronosyltransferase Family 1 Member A8	Protein Coding	41	GC02P233618	0.203071	https://www.genecards.org/cgi-bin/carddisp.pl?gene=UGT1A8
ANGPTL2	Angiopoietin Like 2	Protein Coding	40	GC09M127087	0.203071	https://www.genecards.org/cgi-bin/carddisp.pl?gene=ANGPTL2
MOGAT2	Monoacylglycerol O-Acyltransferase 2	Protein Coding	40	GC11P075717	0.203071	https://www.genecards.org/cgi-bin/carddisp.pl?gene=MOGAT2
RNF128	Ring Finger Protein 128	Protein Coding	40	GC0XP106693	0.203071	https://www.genecards.org/cgi-bin/carddisp.pl?gene=RNF128
UGT1A3	UDP Glucuronosyltransferase Family 1 Member A3	Protein Coding	40	GC02P233729	0.203071	https://www.genecards.org/cgi-bin/carddisp.pl?gene=UGT1A3
YTHDC2	YTH Domain Containing 2	Protein Coding	40	GC05P113513	0.203071	https://www.genecards.org/cgi-bin/carddisp.pl?gene=YTHDC2
SUGP1	SURP And G-Patch Domain Containing 1	Protein Coding	38	GC19M019276	0.203071	https://www.genecards.org/cgi-bin/carddisp.pl?gene=SUGP1
UGT1A5	UDP Glucuronosyltransferase Family 1 Member A5	Protein Coding	38	GC02P233712	0.203071	https://www.genecards.org/cgi-bin/carddisp.pl?gene=UGT1A5
RAB24	RAB24, Member RAS Oncogene Family	Protein Coding	37	GC05M177301	0.203071	https://www.genecards.org/cgi-bin/carddisp.pl?gene=RAB24
ZNF267	Zinc Finger Protein 267	Protein Coding	37	GC16P042008	0.203071	https://www.genecards.org/cgi-bin/carddisp.pl?gene=ZNF267
TNFAIP8L1	TNF Alpha Induced Protein 8 Like 1	Protein Coding	35	GC19P004639	0.203071	https://www.genecards.org/cgi-bin/carddisp.pl?gene=TNFAIP8L1
TRIM67	Tripartite Motif Containing 67	Protein Coding	35	GC01P231162	0.203071	https://www.genecards.org/cgi-bin/carddisp.pl?gene=TRIM67
MIR24-1	MicroRNA 24-1	RNA Gene	21	GC09P095086	0.203071	https://www.genecards.org/cgi-bin/carddisp.pl?gene=MIR24-1
LOC109279247	FGF21/FUT1 Promoter Region	Biological Region	2	GC19P070138	0.203071	https://www.genecards.org/cgi-bin/carddisp.pl?gene=LOC109279247
CXCR4	C-X-C Motif Chemokine Receptor 4	Protein Coding	55	GC02M136114	0.165806	https://www.genecards.org/cgi-bin/carddisp.pl?gene=CXCR4
FGFR4	Fibroblast Growth Factor Receptor 4	Protein Coding	55	GC05P177086	0.165806	https://www.genecards.org/cgi-bin/carddisp.pl?gene=FGFR4
NFKB1	Nuclear Factor Kappa B Subunit 1	Protein Coding	55	GC04P102501	0.165806	https://www.genecards.org/cgi-bin/carddisp.pl?gene=NFKB1
STAT1	Signal Transducer And Activator Of Transcription 1	Protein Coding	55	GC02M190908	0.165806	https://www.genecards.org/cgi-bin/carddisp.pl?gene=STAT1
AR	Androgen Receptor	Protein Coding	54	GC0XP067544	0.165806	https://www.genecards.org/cgi-bin/carddisp.pl?gene=AR
HGF	Hepatocyte Growth Factor	Protein Coding	54	GC07M081699	0.165806	https://www.genecards.org/cgi-bin/carddisp.pl?gene=HGF
MMP13	Matrix Metallopeptidase 13	Protein Coding	54	GC11M102942	0.165806	https://www.genecards.org/cgi-bin/carddisp.pl?gene=MMP13
PRKAA2	Protein Kinase AMP-Activated Catalytic Subunit Alpha 2	Protein Coding	54	GC01P056645	0.165806	https://www.genecards.org/cgi-bin/carddisp.pl?gene=PRKAA2
SMAD3	SMAD Family Member 3	Protein Coding	54	GC15P067063	0.165806	https://www.genecards.org/cgi-bin/carddisp.pl?gene=SMAD3
TLR2	Toll Like Receptor 2	Protein Coding	54	GC04P153684	0.165806	https://www.genecards.org/cgi-bin/carddisp.pl?gene=TLR2
BMPR1A	Bone Morphogenetic Protein Receptor Type 1A	Protein Coding	53	GC10P093501	0.165806	https://www.genecards.org/cgi-bin/carddisp.pl?gene=BMPR1A
GSK3B	Glycogen Synthase Kinase 3 Beta	Protein Coding	52	GC03M119821	0.165806	https://www.genecards.org/cgi-bin/carddisp.pl?gene=GSK3B
EIF2AK3	Eukaryotic Translation Initiation Factor 2 Alpha Kinase 3	Protein Coding	51	GC02M088556	0.165806	https://www.genecards.org/cgi-bin/carddisp.pl?gene=EIF2AK3
KEAP1	Kelch Like ECH Associated Protein 1	Protein Coding	51	GC19M010486	0.165806	https://www.genecards.org/cgi-bin/carddisp.pl?gene=KEAP1
CYP1A1	Cytochrome P450 Family 1 Subfamily A Member 1	Protein Coding	50	GC15M074719	0.165806	https://www.genecards.org/cgi-bin/carddisp.pl?gene=CYP1A1
P2RX7	Purinergic Receptor P2X 7	Protein Coding	50	GC12P126599	0.165806	https://www.genecards.org/cgi-bin/carddisp.pl?gene=P2RX7
PCK1	Phosphoenolpyruvate Carboxykinase 1	Protein Coding	50	GC20P057561	0.165806	https://www.genecards.org/cgi-bin/carddisp.pl?gene=PCK1
ABCC3	ATP Binding Cassette Subfamily C Member 3	Protein Coding	49	GC17P050634	0.165806	https://www.genecards.org/cgi-bin/carddisp.pl?gene=ABCC3
AQP3	Aquaporin 3 (Gill Blood Group)	Protein Coding	49	GC09M033431	0.165806	https://www.genecards.org/cgi-bin/carddisp.pl?gene=AQP3
IHH	Indian Hedgehog Signaling Molecule	Protein Coding	49	GC02M219054	0.165806	https://www.genecards.org/cgi-bin/carddisp.pl?gene=IHH
MAP3K8	Mitogen-Activated Protein Kinase Kinase Kinase 8	Protein Coding	49	GC10P030520	0.165806	https://www.genecards.org/cgi-bin/carddisp.pl?gene=MAP3K8
PRKAB2	Protein Kinase AMP-Activated Non-Catalytic Subunit Beta 2	Protein Coding	49	GC01M147155	0.165806	https://www.genecards.org/cgi-bin/carddisp.pl?gene=PRKAB2
SPHK1	Sphingosine Kinase 1	Protein Coding	49	GC17P076376	0.165806	https://www.genecards.org/cgi-bin/carddisp.pl?gene=SPHK1
ADAR	Adenosine Deaminase RNA Specific	Protein Coding	48	GC01M154582	0.165806	https://www.genecards.org/cgi-bin/carddisp.pl?gene=ADAR
AKR1D1	Aldo-Keto Reductase Family 1 Member D1	Protein Coding	48	GC07P138008	0.165806	https://www.genecards.org/cgi-bin/carddisp.pl?gene=AKR1D1
EHMT2	Euchromatic Histone Lysine Methyltransferase 2	Protein Coding	48	GC06M031879	0.165806	https://www.genecards.org/cgi-bin/carddisp.pl?gene=EHMT2
ERN1	Endoplasmic Reticulum To Nucleus Signaling 1	Protein Coding	48	GC17M064039	0.165806	https://www.genecards.org/cgi-bin/carddisp.pl?gene=ERN1
GPT2	Glutamic--Pyruvic Transaminase 2	Protein Coding	48	GC16P046885	0.165806	https://www.genecards.org/cgi-bin/carddisp.pl?gene=GPT2
MAT1A	Methionine Adenosyltransferase 1A	Protein Coding	48	GC10M080271	0.165806	https://www.genecards.org/cgi-bin/carddisp.pl?gene=MAT1A
NR0B2	Nuclear Receptor Subfamily 0 Group B Member 2	Protein Coding	48	GC01M027137	0.165806	https://www.genecards.org/cgi-bin/carddisp.pl?gene=NR0B2
OSMR	Oncostatin M Receptor	Protein Coding	48	GC05P038845	0.165806	https://www.genecards.org/cgi-bin/carddisp.pl?gene=OSMR
SLC27A2	Solute Carrier Family 27 Member 2	Protein Coding	48	GC15P050182	0.165806	https://www.genecards.org/cgi-bin/carddisp.pl?gene=SLC27A2
SMAD7	SMAD Family Member 7	Protein Coding	48	GC18M048919	0.165806	https://www.genecards.org/cgi-bin/carddisp.pl?gene=SMAD7
UBE2D3	Ubiquitin Conjugating Enzyme E2 D3	Protein Coding	48	GC04M102794	0.165806	https://www.genecards.org/cgi-bin/carddisp.pl?gene=UBE2D3
CRAT	Carnitine O-Acetyltransferase	Protein Coding	47	GC09M129094	0.165806	https://www.genecards.org/cgi-bin/carddisp.pl?gene=CRAT
DDB1	Damage Specific DNA Binding Protein 1	Protein Coding	47	GC11M096879	0.165806	https://www.genecards.org/cgi-bin/carddisp.pl?gene=DDB1
GPNMB	Glycoprotein Nmb	Protein Coding	47	GC07P023238	0.165806	https://www.genecards.org/cgi-bin/carddisp.pl?gene=GPNMB
IDO1	Indoleamine 2,3-Dioxygenase 1	Protein Coding	47	GC08P039891	0.165806	https://www.genecards.org/cgi-bin/carddisp.pl?gene=IDO1
NR5A2	Nuclear Receptor Subfamily 5 Group A Member 2	Protein Coding	47	GC01P199996	0.165806	https://www.genecards.org/cgi-bin/carddisp.pl?gene=NR5A2
RPTOR	Regulatory Associated Protein Of MTOR Complex 1	Protein Coding	47	GC17P080544	0.165806	https://www.genecards.org/cgi-bin/carddisp.pl?gene=RPTOR
SLC27A4	Solute Carrier Family 27 Member 4	Protein Coding	47	GC09P128340	0.165806	https://www.genecards.org/cgi-bin/carddisp.pl?gene=SLC27A4
SMURF1	SMAD Specific E3 Ubiquitin Protein Ligase 1	Protein Coding	47	GC07M099027	0.165806	https://www.genecards.org/cgi-bin/carddisp.pl?gene=SMURF1
CCR9	C-C Motif Chemokine Receptor 9	Protein Coding	46	GC03P047167	0.165806	https://www.genecards.org/cgi-bin/carddisp.pl?gene=CCR9
CXCR3	C-X-C Motif Chemokine Receptor 3	Protein Coding	46	GC0XM071615	0.165806	https://www.genecards.org/cgi-bin/carddisp.pl?gene=CXCR3
FADS1	Fatty Acid Desaturase 1	Protein Coding	46	GC11M061799	0.165806	https://www.genecards.org/cgi-bin/carddisp.pl?gene=FADS1
FBXW7	F-Box And WD Repeat Domain Containing 7	Protein Coding	46	GC04M152321	0.165806	https://www.genecards.org/cgi-bin/carddisp.pl?gene=FBXW7
DNASE1	Deoxyribonuclease 1	Protein Coding	45	GC16P003611	0.165806	https://www.genecards.org/cgi-bin/carddisp.pl?gene=DNASE1
FCN2	Ficolin 2	Protein Coding	45	GC09P134864	0.165806	https://www.genecards.org/cgi-bin/carddisp.pl?gene=FCN2
FFAR4	Free Fatty Acid Receptor 4	Protein Coding	45	GC10P093566	0.165806	https://www.genecards.org/cgi-bin/carddisp.pl?gene=FFAR4
SRD5A2	Steroid 5 Alpha-Reductase 2	Protein Coding	45	GC02M031522	0.165806	https://www.genecards.org/cgi-bin/carddisp.pl?gene=SRD5A2
VARS1	Valyl-TRNA Synthetase 1	Protein Coding	45	GC06M069223	0.165806	https://www.genecards.org/cgi-bin/carddisp.pl?gene=VARS1
ADH1A	Alcohol Dehydrogenase 1A (Class I), Alpha Polypeptide	Protein Coding	44	GC04M099276	0.165806	https://www.genecards.org/cgi-bin/carddisp.pl?gene=ADH1A
BCAP31	B Cell Receptor Associated Protein 31	Protein Coding	44	GC0XM153701	0.165806	https://www.genecards.org/cgi-bin/carddisp.pl?gene=BCAP31
CCRL2	C-C Motif Chemokine Receptor Like 2	Protein Coding	44	GC03P046407	0.165806	https://www.genecards.org/cgi-bin/carddisp.pl?gene=CCRL2
IL22	Interleukin 22	Protein Coding	44	GC12M068248	0.165806	https://www.genecards.org/cgi-bin/carddisp.pl?gene=IL22
OTUB1	OTU Deubiquitinase, Ubiquitin Aldehyde Binding 1	Protein Coding	44	GC11P063985	0.165806	https://www.genecards.org/cgi-bin/carddisp.pl?gene=OTUB1
PPM1K	Protein Phosphatase, Mg2+/Mn2+ Dependent 1K	Protein Coding	44	GC04M088258	0.165806	https://www.genecards.org/cgi-bin/carddisp.pl?gene=PPM1K
RNF5	Ring Finger Protein 5	Protein Coding	44	GC06P087767	0.165806	https://www.genecards.org/cgi-bin/carddisp.pl?gene=RNF5
SCAP	SREBF Chaperone	Protein Coding	44	GC03M047413	0.165806	https://www.genecards.org/cgi-bin/carddisp.pl?gene=SCAP
TWIST2	Twist Family BHLH Transcription Factor 2	Protein Coding	44	GC02P238848	0.165806	https://www.genecards.org/cgi-bin/carddisp.pl?gene=TWIST2
GGT5	Gamma-Glutamyltransferase 5	Protein Coding	43	GC22M024219	0.165806	https://www.genecards.org/cgi-bin/carddisp.pl?gene=GGT5
IL19	Interleukin 19	Protein Coding	43	GC01P206770	0.165806	https://www.genecards.org/cgi-bin/carddisp.pl?gene=IL19
INSIG1	Insulin Induced Gene 1	Protein Coding	43	GC07P155297	0.165806	https://www.genecards.org/cgi-bin/carddisp.pl?gene=INSIG1
NFE2	Nuclear Factor, Erythroid 2	Protein Coding	43	GC12M054292	0.165806	https://www.genecards.org/cgi-bin/carddisp.pl?gene=NFE2
OLFM4	Olfactomedin 4	Protein Coding	43	GC13P053028	0.165806	https://www.genecards.org/cgi-bin/carddisp.pl?gene=OLFM4
SIRT7	Sirtuin 7	Protein Coding	43	GC17M081911	0.165806	https://www.genecards.org/cgi-bin/carddisp.pl?gene=SIRT7
WWTR1	WW Domain Containing Transcription Regulator 1	Protein Coding	43	GC03M149517	0.165806	https://www.genecards.org/cgi-bin/carddisp.pl?gene=WWTR1
BBC3	BCL2 Binding Component 3	Protein Coding	42	GC19M047220	0.165806	https://www.genecards.org/cgi-bin/carddisp.pl?gene=BBC3
OLFM2	Olfactomedin 2	Protein Coding	41	GC19M009853	0.165806	https://www.genecards.org/cgi-bin/carddisp.pl?gene=OLFM2
RAB32	RAB32, Member RAS Oncogene Family	Protein Coding	40	GC06P146543	0.165806	https://www.genecards.org/cgi-bin/carddisp.pl?gene=RAB32
RLN2	Relaxin 2	Protein Coding	40	GC09M005402	0.165806	https://www.genecards.org/cgi-bin/carddisp.pl?gene=RLN2
THRSP	Thyroid Hormone Responsive	Protein Coding	40	GC11P078063	0.165806	https://www.genecards.org/cgi-bin/carddisp.pl?gene=THRSP
DNAJB12	DnaJ Heat Shock Protein Family (Hsp40) Member B12	Protein Coding	37	GC10M072332	0.165806	https://www.genecards.org/cgi-bin/carddisp.pl?gene=DNAJB12
MXD3	MAX Dimerization Protein 3	Protein Coding	37	GC05M178014	0.165806	https://www.genecards.org/cgi-bin/carddisp.pl?gene=MXD3
YIPF6	Yip1 Domain Family Member 6	Protein Coding	36	GC0XP068498	0.165806	https://www.genecards.org/cgi-bin/carddisp.pl?gene=YIPF6
FAM174A	Family With Sequence Similarity 174 Member A	Protein Coding	35	GC05P100535	0.165806	https://www.genecards.org/cgi-bin/carddisp.pl?gene=FAM174A
PPDPF	Pancreatic Progenitor Cell Differentiation And Proliferation Factor	Protein Coding	33	GC20P063520	0.165806	https://www.genecards.org/cgi-bin/carddisp.pl?gene=PPDPF
MALRD1	MAM And LDL Receptor Class A Domain Containing 1	Protein Coding	31	GC10P019048	0.165806	https://www.genecards.org/cgi-bin/carddisp.pl?gene=MALRD1
GGT2P	Gamma-Glutamyltransferase 2, Pseudogene	Pseudogene	29	GC22M059623	0.165806	https://www.genecards.org/cgi-bin/carddisp.pl?gene=GGT2P
MIR26B	MicroRNA 26b	RNA Gene	24	GC02P218402	0.165806	https://www.genecards.org/cgi-bin/carddisp.pl?gene=MIR26B
MIR141	MicroRNA 141	RNA Gene	23	GC12P022385	0.165806	https://www.genecards.org/cgi-bin/carddisp.pl?gene=MIR141
MIR30B	MicroRNA 30b	RNA Gene	23	GC08M134800	0.165806	https://www.genecards.org/cgi-bin/carddisp.pl?gene=MIR30B
MIR423	MicroRNA 423	RNA Gene	21	GC17P030117	0.165806	https://www.genecards.org/cgi-bin/carddisp.pl?gene=MIR423
MIR188	MicroRNA 188	RNA Gene	19	GC0XP050003	0.165806	https://www.genecards.org/cgi-bin/carddisp.pl?gene=MIR188
LINC00333	Long Intergenic Non-Protein Coding RNA 333	RNA Gene	13	GC13P084140	0.165806	https://www.genecards.org/cgi-bin/carddisp.pl?gene=LINC00333
ESR1	Estrogen Receptor 1	Protein Coding	56	GC06P151656	0.117243	https://www.genecards.org/cgi-bin/carddisp.pl?gene=ESR1
IKBKB	Inhibitor Of Nuclear Factor Kappa B Kinase Subunit Beta	Protein Coding	56	GC08P042271	0.117243	https://www.genecards.org/cgi-bin/carddisp.pl?gene=IKBKB
PIK3CA	Phosphatidylinositol-4,5-Bisphosphate 3-Kinase Catalytic Subunit Alpha	Protein Coding	55	GC03P179148	0.117243	https://www.genecards.org/cgi-bin/carddisp.pl?gene=PIK3CA
PLAU	Plasminogen Activator, Urokinase	Protein Coding	55	GC10P073909	0.117243	https://www.genecards.org/cgi-bin/carddisp.pl?gene=PLAU
MAPK14	Mitogen-Activated Protein Kinase 14	Protein Coding	54	GC06P087896	0.117243	https://www.genecards.org/cgi-bin/carddisp.pl?gene=MAPK14
DSP	Desmoplakin	Protein Coding	53	GC06P007541	0.117243	https://www.genecards.org/cgi-bin/carddisp.pl?gene=DSP
CPT2	Carnitine Palmitoyltransferase 2	Protein Coding	52	GC01P053196	0.117243	https://www.genecards.org/cgi-bin/carddisp.pl?gene=CPT2
IL1RN	Interleukin 1 Receptor Antagonist	Protein Coding	52	GC02P123138	0.117243	https://www.genecards.org/cgi-bin/carddisp.pl?gene=IL1RN
MAPK9	Mitogen-Activated Protein Kinase 9	Protein Coding	52	GC05M180260	0.117243	https://www.genecards.org/cgi-bin/carddisp.pl?gene=MAPK9
ACE2	Angiotensin Converting Enzyme 2	Protein Coding	51	GC0XM015494	0.117243	https://www.genecards.org/cgi-bin/carddisp.pl?gene=ACE2
GPI	Glucose-6-Phosphate Isomerase	Protein Coding	51	GC19P034359	0.117243	https://www.genecards.org/cgi-bin/carddisp.pl?gene=GPI
GRM5	Glutamate Metabotropic Receptor 5	Protein Coding	50	GC11M088504	0.117243	https://www.genecards.org/cgi-bin/carddisp.pl?gene=GRM5
PARK7	Parkinsonism Associated Deglycase	Protein Coding	50	GC01P008121	0.117243	https://www.genecards.org/cgi-bin/carddisp.pl?gene=PARK7
TP63	Tumor Protein P63	Protein Coding	50	GC03P189598	0.117243	https://www.genecards.org/cgi-bin/carddisp.pl?gene=TP63
SP1	Sp1 Transcription Factor	Protein Coding	49	GC12P053380	0.117243	https://www.genecards.org/cgi-bin/carddisp.pl?gene=SP1
CD34	CD34 Molecule	Protein Coding	48	GC01M207880	0.117243	https://www.genecards.org/cgi-bin/carddisp.pl?gene=CD34
SIK2	Salt Inducible Kinase 2	Protein Coding	48	GC11P111965	0.117243	https://www.genecards.org/cgi-bin/carddisp.pl?gene=SIK2
TRAF3	TNF Receptor Associated Factor 3	Protein Coding	48	GC14P110165	0.117243	https://www.genecards.org/cgi-bin/carddisp.pl?gene=TRAF3
ULK1	Unc-51 Like Autophagy Activating Kinase 1	Protein Coding	48	GC12P131894	0.117243	https://www.genecards.org/cgi-bin/carddisp.pl?gene=ULK1
ACSL1	Acyl-CoA Synthetase Long Chain Family Member 1	Protein Coding	47	GC04M184755	0.117243	https://www.genecards.org/cgi-bin/carddisp.pl?gene=ACSL1
ANGPTL4	Angiopoietin Like 4	Protein Coding	47	GC19P008363	0.117243	https://www.genecards.org/cgi-bin/carddisp.pl?gene=ANGPTL4
CHGA	Chromogranin A	Protein Coding	47	GC14P092947	0.117243	https://www.genecards.org/cgi-bin/carddisp.pl?gene=CHGA
PLAUR	Plasminogen Activator, Urokinase Receptor	Protein Coding	47	GC19M043646	0.117243	https://www.genecards.org/cgi-bin/carddisp.pl?gene=PLAUR
VTN	Vitronectin	Protein Coding	47	GC17M044982	0.117243	https://www.genecards.org/cgi-bin/carddisp.pl?gene=VTN
ABCG1	ATP Binding Cassette Subfamily G Member 1	Protein Coding	46	GC21P042199	0.117243	https://www.genecards.org/cgi-bin/carddisp.pl?gene=ABCG1
PDK4	Pyruvate Dehydrogenase Kinase 4	Protein Coding	46	GC07M095583	0.117243	https://www.genecards.org/cgi-bin/carddisp.pl?gene=PDK4
SLC39A14	Solute Carrier Family 39 Member 14	Protein Coding	46	GC08P022367	0.117243	https://www.genecards.org/cgi-bin/carddisp.pl?gene=SLC39A14
CELSR2	Cadherin EGF LAG Seven-Pass G-Type Receptor 2	Protein Coding	45	GC01P109250	0.117243	https://www.genecards.org/cgi-bin/carddisp.pl?gene=CELSR2
EEF1A1	Eukaryotic Translation Elongation Factor 1 Alpha 1	Protein Coding	45	GC06M073515	0.117243	https://www.genecards.org/cgi-bin/carddisp.pl?gene=EEF1A1
PREP	Prolyl Endopeptidase	Protein Coding	45	GC06M105277	0.117243	https://www.genecards.org/cgi-bin/carddisp.pl?gene=PREP
SLC30A9	Solute Carrier Family 30 Member 9	Protein Coding	45	GC04P041992	0.117243	https://www.genecards.org/cgi-bin/carddisp.pl?gene=SLC30A9
SLC39A4	Solute Carrier Family 39 Member 4	Protein Coding	45	GC08M144409	0.117243	https://www.genecards.org/cgi-bin/carddisp.pl?gene=SLC39A4
CDKN3	Cyclin Dependent Kinase Inhibitor 3	Protein Coding	44	GC14P054398	0.117243	https://www.genecards.org/cgi-bin/carddisp.pl?gene=CDKN3
CYP4F3	Cytochrome P450 Family 4 Subfamily F Member 3	Protein Coding	44	GC19P015640	0.117243	https://www.genecards.org/cgi-bin/carddisp.pl?gene=CYP4F3
TRAF1	TNF Receptor Associated Factor 1	Protein Coding	44	GC09M120902	0.117243	https://www.genecards.org/cgi-bin/carddisp.pl?gene=TRAF1
BNIP3	BCL2 Interacting Protein 3	Protein Coding	43	GC10M131966	0.117243	https://www.genecards.org/cgi-bin/carddisp.pl?gene=BNIP3
HIF3A	Hypoxia Inducible Factor 3 Subunit Alpha	Protein Coding	43	GC19P046297	0.117243	https://www.genecards.org/cgi-bin/carddisp.pl?gene=HIF3A
SENP2	SUMO Specific Peptidase 2	Protein Coding	43	GC03P185582	0.117243	https://www.genecards.org/cgi-bin/carddisp.pl?gene=SENP2
GOLM1	Golgi Membrane Protein 1	Protein Coding	42	GC09M086026	0.117243	https://www.genecards.org/cgi-bin/carddisp.pl?gene=GOLM1
CCN1	Cellular Communication Network Factor 1	Protein Coding	41	GC01P085581	0.117243	https://www.genecards.org/cgi-bin/carddisp.pl?gene=CCN1
MAS1	MAS1 Proto-Oncogene, G Protein-Coupled Receptor	Protein Coding	41	GC06P160675	0.117243	https://www.genecards.org/cgi-bin/carddisp.pl?gene=MAS1
ZNF638	Zinc Finger Protein 638	Protein Coding	41	GC02P071276	0.117243	https://www.genecards.org/cgi-bin/carddisp.pl?gene=ZNF638
JAZF1	JAZF Zinc Finger 1	Protein Coding	40	GC07M027830	0.117243	https://www.genecards.org/cgi-bin/carddisp.pl?gene=JAZF1
SLC7A3	Solute Carrier Family 7 Member 3	Protein Coding	40	GC0XM070926	0.117243	https://www.genecards.org/cgi-bin/carddisp.pl?gene=SLC7A3
PPARGC1B	PPARG Coactivator 1 Beta	Protein Coding	39	GC05P149730	0.117243	https://www.genecards.org/cgi-bin/carddisp.pl?gene=PPARGC1B
TMEM97	Transmembrane Protein 97	Protein Coding	38	GC17P028319	0.117243	https://www.genecards.org/cgi-bin/carddisp.pl?gene=TMEM97
ZNF300	Zinc Finger Protein 300	Protein Coding	38	GC05M150894	0.117243	https://www.genecards.org/cgi-bin/carddisp.pl?gene=ZNF300
MT-ND3	Mitochondrially Encoded NADH:Ubiquinone Oxidoreductase Core Subunit 3	Protein Coding	35	GCMTP010061	0.117243	https://www.genecards.org/cgi-bin/carddisp.pl?gene=MT-ND3
TM6SF1	Transmembrane 6 Superfamily Member 1	Protein Coding	34	GC15P120852	0.117243	https://www.genecards.org/cgi-bin/carddisp.pl?gene=TM6SF1
MIR214	MicroRNA 214	RNA Gene	24	GC01M172234	0.117243	https://www.genecards.org/cgi-bin/carddisp.pl?gene=MIR214
MIR195	MicroRNA 195	RNA Gene	23	GC17M007018	0.117243	https://www.genecards.org/cgi-bin/carddisp.pl?gene=MIR195
MIR144	MicroRNA 144	RNA Gene	21	GC17M044993	0.117243	https://www.genecards.org/cgi-bin/carddisp.pl?gene=MIR144
MIR486-1	MicroRNA 486-1	RNA Gene	20	GC08M041660	0.117243	https://www.genecards.org/cgi-bin/carddisp.pl?gene=MIR486-1
MIR194-1	MicroRNA 194-1	RNA Gene	18	GC01M220118	0.117243	https://www.genecards.org/cgi-bin/carddisp.pl?gene=MIR194-1
MIR363	MicroRNA 363	RNA Gene	18	GC0XM134322	0.117243	https://www.genecards.org/cgi-bin/carddisp.pl?gene=MIR363
MIR486-2	MicroRNA 486-2	RNA Gene	16	GC08P041717	0.117243	https://www.genecards.org/cgi-bin/carddisp.pl?gene=MIR486-2
MIR4668	MicroRNA 4668	RNA Gene	13	GC09P111932	0.117243	https://www.genecards.org/cgi-bin/carddisp.pl?gene=MIR4668
MIR3666	MicroRNA 3666	RNA Gene	12	GC07P114653	0.117243	https://www.genecards.org/cgi-bin/carddisp.pl?gene=MIR3666

## Sheet: OMIM-Entry-Retrieval 
OMIM Search - 'nafld '
Downloaded:	September 29, 2024
Copyright (c) 1966-2024 Johns Hopkins University OMIM, data are provided for research purposes only.
MIM Number	Title	Included Titles	Cytogenetic Location	Genomic Coordinates (From NCBI/GRCh38)	Entrez Gene ID
%613282	FATTY LIVER DISEASE, SUSCEPTIBILITY TO, 1; FLD1		22q13	22:37200001-50818468	100380876
%613387	FATTY LIVER DISEASE, SUSCEPTIBILITY TO, 2; FLD2		11q23	11:110600001-121300000	100462725
*603598	TUMOR NECROSIS FACTOR LIGAND SUPERFAMILY, MEMBER 10; TNFSF10		3q26.31	3:172505508-172523430	8743
*619642	TRANSMEMBRANE p24 TRAFFICKING PROTEIN 2; TMED2		12q24.31	12:123584552-123598582	10959
*603314	SOLUTE CARRIER FAMILY 27 (FATTY ACID TRANSPORTER), MEMBER 5; SLC27A5		19q13.43	19:58498333-58511992	10998
*620175	RUBICON-LIKE AUTOPHAGY ENHANCER; RUBCNL		13q14.13	13:46334681-46390042	80183
*600953	INTERLEUKIN 18; IL18		11q23.1	11:112143260-112164094	3606
*603030	TOLL-LIKE RECEPTOR 4; TLR4		9q33.1	9:117704403-117724735	7099
*607273	FOLLICULIN; FLCN		17p11.2	17:17212212-17237330	201163
*620966	TLC DOMAIN-CONTAINING PROTEIN 1; TLCD1		17q11.2	17:27400001-33500000
*620967	TLC DOMAIN-CONTAINING PROTEIN 2; TLCD2		17p13.3	17:1-3400000

## Sheet: Therapeutic Target Database
Genename
PPARA
PPAR-γ
FXR
FASN
GLP1R
DGAT2
PPARD
Nrf2
AMPK
LGALS3
RIPK1
KLB
TG2
PDE4
HSD17B13
DGAT2 mRNA
FGF19
PPAR
