# Supplementary material for: Mechanisms of Yinchen combined with Huangbai against Non-alcoholic fatty liver disease based on Network pharmacology, Molecular docking and Molecular Dynamics Simulations
Source: Research Square preprint supplement (doi:10.21203/rs.3.rs-7535069/v1), 2025-10-17
Supplement: Supplementary file 7 [file ae8ffbfbcbcce9034a8a541e.docx]

TABLE 2: The active compounds information of *Huangbai*.

| Mol ID | Molecule name | Structure（2D） | OB (%) | DL |
| --- | --- | --- | --- | --- |
| MOL000622 | Magnograndiolide | 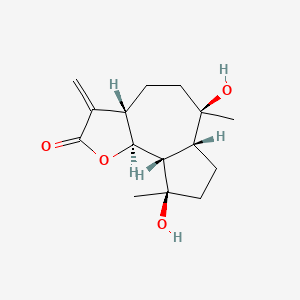 | 63.71 | 0.19 |
| MOL002663 | Skimmianin | 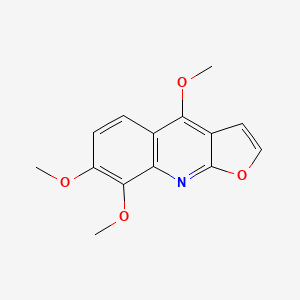 | 40.14 | 0.2 |
| MOL000098 | quercetin | 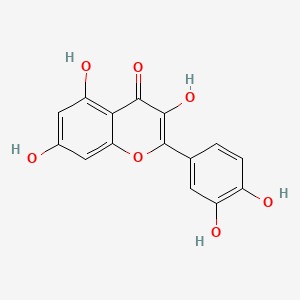 | 46.43 | 0.28 |
| MOL002644 | Phellopterin | 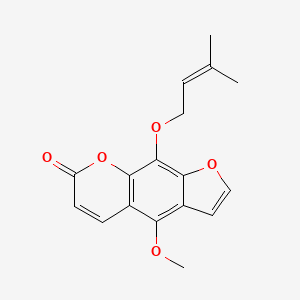 | 40.19 | 0.28 |
| MOL001131 | phellamurin_qt | 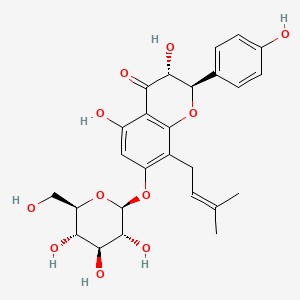 | 56.6 | 0.39 |
| MOL002651 | Dehydrotanshinone II A | 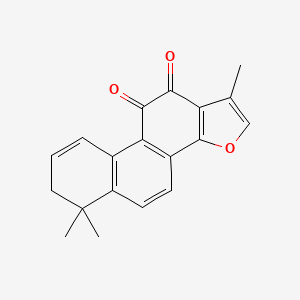 | 43.76 | 0.4 |
| MOL002641 | Phellavin_qt | 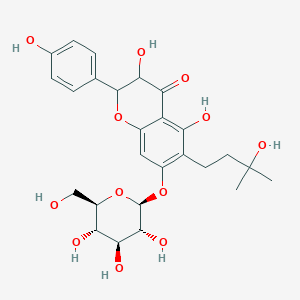 | 35.86 | 0.44 |
| MOL000790 | Isocorypalmine | 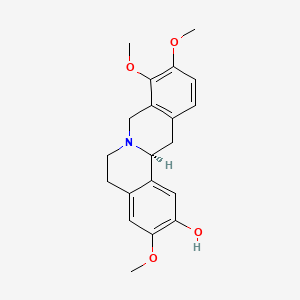 | 35.77 | 0.59 |
| MOL002662 | rutaecarpine | 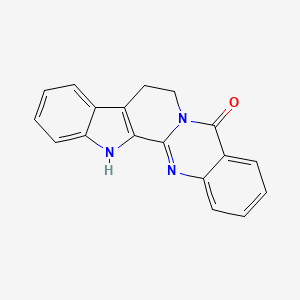 | 40.3 | 0.6 |
| MOL002672 | Hericenone H | 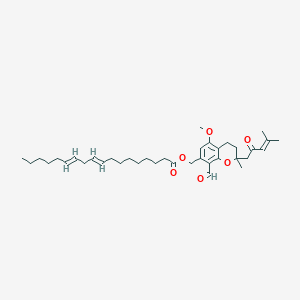 | 39 | 0.63 |
| MOL000785 | palmatine | 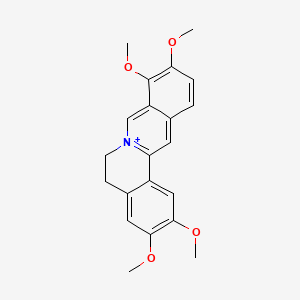 | 64.6 | 0.65 |
| MOL000762 | Palmidin A | 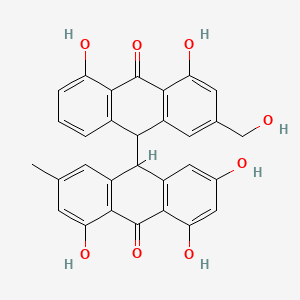 | 35.36 | 0.65 |
| MOL002671 | Candletoxin A | 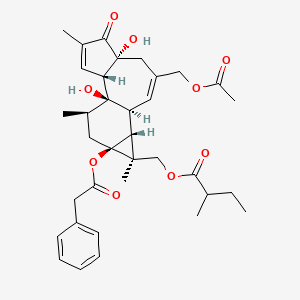 | 31.81 | 0.69 |
| MOL002643 | delta 7-stigmastenol | 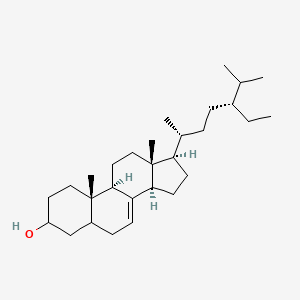 | 37.42 | 0.75 |
| MOL002652 | delta7-Dehydrosophoramine | 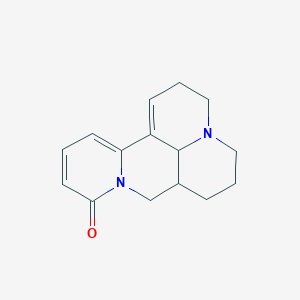 | 54.45 | 0.25 |
| MOL002656 | dihydroniloticin | 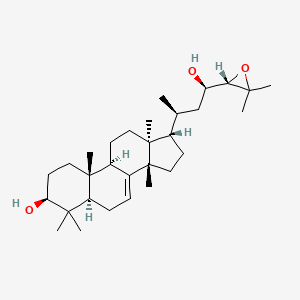 | 36.43 | 0.81 |
| MOL002660 | niloticin | 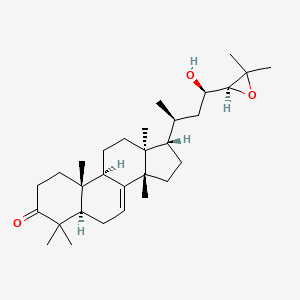 | 41.41 | 0.82 |
| MOL002666 | Chelerythrine | 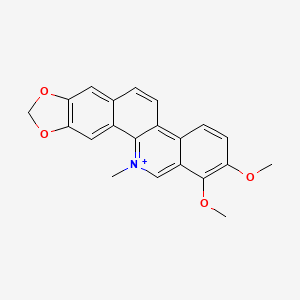 | 34.18 | 0.78 |
| MOL002668 | Worenine | 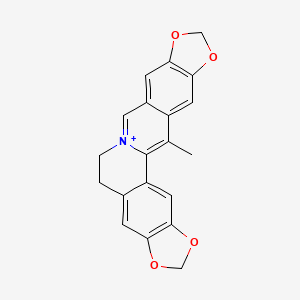 | 45.83 | 0.87 |
| MOL002670 | Cavidine | 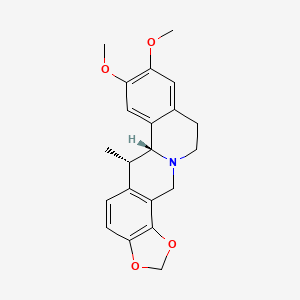 | 35.64 | 0.81 |
| MOL002673 | Hispidone | 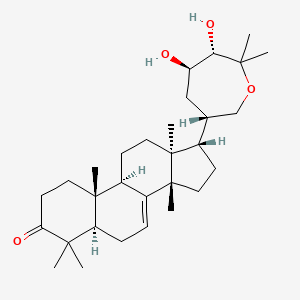 | 36.18 | 0.83 |
| MOL005438 | campesterol | 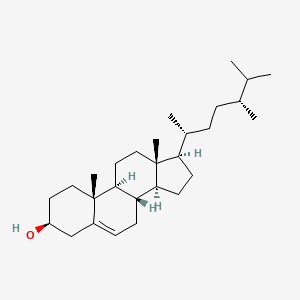 | 37.58 | 0.71 |
| MOL006401 | melianone | 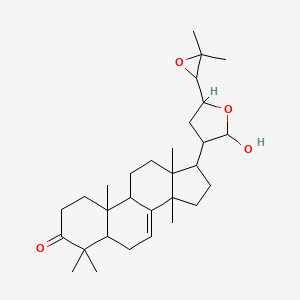 | 40.53 | 0.78 |
| MOL006413 | phellochin | 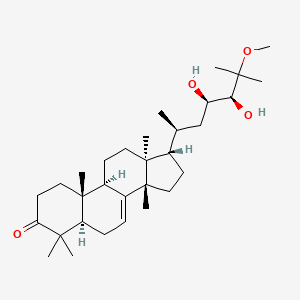 | 35.41 | 0.82 |
| MOL006422 | thalifendine | 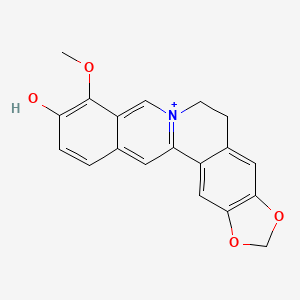 | 44.41 | 0.73 |
| MOL013352 | Obacunone | 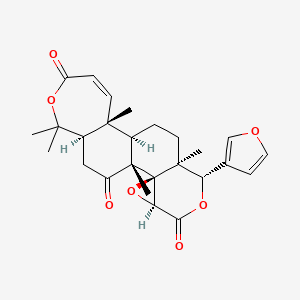 | 43.29 | 0.77 |
