# Supplementary material for: Mechanisms of Yinchen combined with Huangbai against Non-alcoholic fatty liver disease based on Network pharmacology, Molecular docking and Molecular Dynamics Simulations
Source: Research Square preprint supplement (doi:10.21203/rs.3.rs-7535069/v1), 2025-10-17
Supplement: Supplementary file 8 [file df768ebc59d87968306c6e25.xlsx]

## Sheet: Sheet1
Shared name	name	AverageShortestPathLength	ClusteringCofficient	ClosenessCentrality	IsSingleNode	PartnerOfMultiEdgeNodePairs	Selfloops	Eccentricity	Stress	Degree	BetweennessCentrality	NeighborhoodConnectivity	NumberOfDirectedEdges	NumberOfUndirectedEdges	Radiality	TopologicalCoefficient
TNF	TNF	1.35374	0.232174	0.738693	FALSE	0	0	3	19360	97	0.131102	27.2784	0	97	0.996353	0.188127
AKT1	AKT1	1.39456	0.25509	0.717073	FALSE	0	0	4	14946	94	0.0933956	28.3617	0	94	0.995932	0.196956
PPARG	PPARG	1.53061	0.266801	0.653333	FALSE	0	0	3	13388	71	0.0779294	29.5352	0	71	0.99453	0.203691
STAT3	STAT3	1.56463	0.359006	0.63913	FALSE	0	0	3	7206	70	0.0366705	32.6	0	70	0.994179	0.231206
HSP90AA1	HSP90AA1	1.55102	0.345269	0.644737	FALSE	0	0	3	9000	69	0.0428413	32.3478	0	69	0.994319	0.224638
EGFR	EGFR	1.59184	0.349163	0.628205	FALSE	0	0	4	6638	67	0.0305061	32.9851	0	67	0.993899	0.232289
CASP3	CASP3	1.58503	0.38806	0.630901	FALSE	0	0	3	5244	67	0.0206841	33.8358	0	67	0.993969	0.23997
HIF1A	HIF1A	1.63265	0.405258	0.6125	FALSE	0	0	4	4486	64	0.0170441	34.7812	0	64	0.993478	0.250225
CTNNB1	CTNNB1	1.60544	0.389385	0.622881	FALSE	0	0	3	5716	64	0.0229825	34.3906	0	64	0.993758	0.243905
ESR1	ESR1	1.61224	0.331797	0.620253	FALSE	0	0	3	8920	63	0.0452992	31.7937	0	63	0.993688	0.225487
MMP9	MMP9	1.63946	0.397459	0.609959	FALSE	0	0	3	5586	58	0.0291272	34.431	0	58	0.993408	0.242472
TLR4	TLR4	1.64626	0.346491	0.607438	FALSE	0	0	3	5540	57	0.0269167	32.3684	0	57	0.993338	0.227947
MTOR	MTOR	1.63946	0.417293	0.609959	FALSE	0	0	3	4992	57	0.0182683	35.8596	0	57	0.993408	0.250767
PPARA	PPARA	1.63265	0.298701	0.6125	FALSE	0	0	3	9794	56	0.0424923	31.8214	0	56	0.993478	0.219458
PTGS2	PTGS2	1.66667	0.409504	0.6	FALSE	0	0	3	5976	54	0.0293332	35.8148	0	54	0.993127	0.252217
SIRT1	SIRT1	1.67347	0.436059	0.597561	FALSE	0	0	4	4770	54	0.0204616	37.537	0	54	0.993057	0.262497
RELA	RELA	1.73469	0.54334	0.576471	FALSE	0	0	3	2274	44	0.00780965	41.2045	0	44	0.992426	0.290173
NOS3	NOS3	1.7483	0.48505	0.571984	FALSE	0	0	3	2600	43	0.00959161	39.5116	0	43	0.992286	0.280224
MDM2	MDM2	1.78912	0.534262	0.558935	FALSE	0	0	4	1726	42	0.00601962	40.0238	0	42	0.991865	0.290028
MAPK14	MAPK14	1.77551	0.541463	0.563218	FALSE	0	0	4	2356	41	0.00794513	41.8049	0	41	0.992005	0.296488
MMP2	MMP2	1.80952	0.566145	0.552632	FALSE	0	0	4	1066	38	0.00353864	41.3158	0	38	0.991654	0.297236
HNF4A	HNF4A	1.78912	0.396871	0.558935	FALSE	0	0	3	3618	38	0.0134799	35.6053	0	38	0.991865	0.254323
HSP90AB1	HSP90AB1	1.80272	0.489331	0.554717	FALSE	0	0	3	1908	38	0.00682005	38.2632	0	38	0.991725	0.277269
MAPK8	MAPK8	1.78912	0.615932	0.558935	FALSE	0	0	3	1294	38	0.00356413	44.5526	0	38	0.991865	0.318233
ICAM1	ICAM1	1.80952	0.512012	0.552632	FALSE	0	0	3	1388	37	0.00560869	37.8919	0	37	0.991654	0.274579
AR	AR	1.79592	0.555556	0.556818	FALSE	0	0	3	2148	37	0.00745883	42.1351	0	37	0.991795	0.300965
GSK3B	GSK3B	1.81633	0.593093	0.550562	FALSE	0	0	4	1392	37	0.00346946	43.9189	0	37	0.991584	0.315963
APP	APP	1.81633	0.537815	0.550562	FALSE	0	0	4	2016	35	0.00733769	43.0857	0	35	0.991584	0.305572
IGF1R	IGF1R	1.81633	0.607843	0.550562	FALSE	0	0	3	1084	34	0.00408159	43.6765	0	34	0.991584	0.311975
IKBKB	IKBKB	1.83673	0.618952	0.544444	FALSE	0	0	3	876	32	0.00250803	44.5625	0	32	0.991374	0.320594
CDK4	CDK4	1.88435	0.6	0.530686	FALSE	0	0	4	1096	30	0.00419971	43.5	0	30	0.990883	0.319853
PIK3CA	PIK3CA	1.91837	0.604598	0.521277	FALSE	0	0	3	1226	30	0.00532041	41.7	0	30	0.990532	0.323256
CYP3A4	CYP3A4	1.85714	0.332512	0.538462	FALSE	0	0	3	4750	29	0.0189811	29.3448	0	29	0.991163	0.211114
FASN	FASN	1.87755	0.462963	0.532609	FALSE	0	0	4	2288	28	0.00755615	37.3214	0	28	0.990953	0.268499
AHR	AHR	1.84354	0.547619	0.542435	FALSE	0	0	3	2276	28	0.00538465	44.1071	0	28	0.991304	0.310614
PARP1	PARP1	1.91837	0.653439	0.521277	FALSE	0	0	4	528	28	0.0019082	44.6429	0	28	0.990532	0.335661
HSPA1A	HSPA1A	1.91156	0.558405	0.523132	FALSE	0	0	4	990	27	0.00385641	41.7037	0	27	0.990602	0.308916
CHUK	CHUK	1.91156	0.658462	0.523132	FALSE	0	0	3	604	26	0.00199128	46.6538	0	26	0.990602	0.348163
NR1H4	NR1H4	1.86395	0.386667	0.536496	FALSE	0	0	3	2564	25	0.00782603	36.72	0	25	0.991093	0.258592
PRKCD	PRKCD	1.89796	0.546667	0.526882	FALSE	0	0	3	3718	25	0.0186416	40.24	0	25	0.990743	0.295588
MAP3K5	MAP3K5	2.0068	0.663043	0.498305	FALSE	0	0	4	258	24	0.000916827	43.5	0	24	0.989621	0.350806
PTPN1	PTPN1	1.89116	0.594203	0.528777	FALSE	0	0	3	572	24	0.00145639	44.875	0	24	0.990813	0.322842
IGFBP3	IGFBP3	1.89796	0.634058	0.526882	FALSE	0	0	4	640	24	0.00227491	47.625	0	24	0.990743	0.340179
F2	F2	1.93878	0.343874	0.515789	FALSE	0	0	4	1474	23	0.00635212	31.7391	0	23	0.990322	0.235105
HSP90B1	HSP90B1	1.98639	0.592885	0.503425	FALSE	0	0	4	398	23	0.00146591	41.3913	0	23	0.989831	0.32337
CYP1A1	CYP1A1	1.87755	0.387352	0.532609	FALSE	0	0	3	3860	23	0.0184745	32	0	23	0.990953	0.225352
XBP1	XBP1	1.92517	0.636364	0.519435	FALSE	0	0	4	482	23	0.00155141	47.0435	0	23	0.990462	0.343383
TERT	TERT	1.93878	0.770751	0.515789	FALSE	0	0	4	394	23	0.000760196	50.3043	0	23	0.990322	0.372625
INSR	INSR	1.94558	0.441558	0.513986	FALSE	0	0	3	646	22	0.00241794	37.0909	0	22	0.990252	0.278879
TNFRSF1A	TNFRSF1A	1.92517	0.727273	0.519435	FALSE	0	0	3	276	22	0.000749955	48.0909	0	22	0.990462	0.35361
SREBF2	SREBF2	1.92517	0.528139	0.519435	FALSE	0	0	4	1312	22	0.00384477	37.2727	0	22	0.990462	0.270092
FABP4	FABP4	1.93878	0.42381	0.515789	FALSE	0	0	4	984	21	0.00439089	30.5238	0	21	0.990322	0.222802
PDGFRB	PDGFRB	1.94558	0.738095	0.513986	FALSE	0	0	4	270	21	0.000652484	51.4762	0	21	0.990252	0.378501
PRKDC	PRKDC	2.02041	0.657143	0.494949	FALSE	0	0	3	318	21	0.000836659	42.381	0	21	0.98948	0.344561
NOS2	NOS2	1.93878	0.752381	0.515789	FALSE	0	0	4	298	21	0.000944247	49.8571	0	21	0.990322	0.363921
MAPK9	MAPK9	1.95238	0.590476	0.512195	FALSE	0	0	3	492	21	0.00135165	42.7143	0	21	0.990182	0.32116
LIPE	LIPE	1.95918	0.452632	0.510417	FALSE	0	0	4	2314	20	0.0174378	29.6	0	20	0.990112	0.221805
MMP7	MMP7	1.97279	0.694737	0.506897	FALSE	0	0	4	356	20	0.00111495	46.7	0	20	0.989971	0.351128
HMGCR	HMGCR	1.92517	0.510526	0.519435	FALSE	0	0	4	1218	20	0.00403453	33.4	0	20	0.990462	0.238571
SHH	SHH	1.95918	0.657895	0.510417	FALSE	0	0	3	328	20	0.00132329	45.1	0	20	0.990112	0.339098
PLAU	PLAU	1.95918	0.668421	0.510417	FALSE	0	0	4	262	20	0.000933377	44.15	0	20	0.990112	0.327037
FABP1	FABP1	2.05442	0.336842	0.486755	FALSE	0	0	3	1028	20	0.00532504	24.4	0	20	0.98913	0.205042
NOX4	NOX4	1.95918	0.736842	0.510417	FALSE	0	0	4	244	19	0.000711436	50.4211	0	19	0.990112	0.370743
CYP2C9	CYP2C9	2.04762	0.421053	0.488372	FALSE	0	0	3	1122	19	0.00505939	24.6842	0	19	0.9892	0.204002
NR1I2	NR1I2	1.94558	0.409357	0.513986	FALSE	0	0	3	2020	19	0.00678106	35.1579	0	19	0.990252	0.258514
SIRT2	SIRT2	1.96599	0.736842	0.508651	FALSE	0	0	4	406	19	0.00144315	51.9474	0	19	0.990041	0.384795
LRRK2	LRRK2	2.06122	0.666667	0.485149	FALSE	0	0	4	198	19	0.000638943	44.6316	0	19	0.98906	0.368856
NR1H3	NR1H3	1.97279	0.584795	0.506897	FALSE	0	0	4	1640	19	0.0115747	33.4211	0	19	0.989971	0.25089
CTSD	CTSD	2.01361	0.54902	0.496622	FALSE	0	0	4	780	18	0.0029164	40.2222	0	18	0.98955	0.313802
PKM	PKM	2.09524	0.745098	0.477273	FALSE	0	0	4	112	18	0.00034613	47.9444	0	18	0.988709	0.409782
SCD	SCD	1.96599	0.614379	0.508651	FALSE	0	0	4	686	18	0.00194436	35.5556	0	18	0.990041	0.261438
CYP2C19	CYP2C19	2.15646	0.397059	0.463722	FALSE	0	0	3	1736	17	0.0092878	20.7059	0	17	0.988078	0.194784
VDR	VDR	1.95918	0.588235	0.510417	FALSE	0	0	4	1022	17	0.00290284	46.7059	0	17	0.990112	0.338448
CCR2	CCR2	1.97279	0.617647	0.506897	FALSE	0	0	3	412	17	0.00190997	43.8235	0	17	0.989971	0.327041
MAP3K7	MAP3K7	2.07483	0.610294	0.481967	FALSE	0	0	4	232	17	0.00101089	38.7647	0	17	0.988919	0.320369
AGTR1	AGTR1	1.9932	0.716667	0.501706	FALSE	0	0	4	158	16	0.000487189	48.4375	0	16	0.989761	0.361474
LGALS3	LGALS3	2.0068	0.75	0.498305	FALSE	0	0	4	210	16	0.000879627	49.75	0	16	0.989621	0.376894
DPP4	DPP4	1.96599	0.575	0.508651	FALSE	0	0	4	730	16	0.00387024	45.6875	0	16	0.990041	0.331069
RBP4	RBP4	2.03401	0.35	0.491639	FALSE	0	0	3	1168	16	0.00586935	25.25	0	16	0.98934	0.200397
CNR1	CNR1	2.01361	0.447619	0.496622	FALSE	0	0	4	1388	15	0.00619031	38.8	0	15	0.98955	0.293939
CYP1A2	CYP1A2	2.12245	0.428571	0.471154	FALSE	0	0	3	720	15	0.00345123	23.0667	0	15	0.988428	0.20354
NAMPT	NAMPT	1.98639	0.67619	0.503425	FALSE	0	0	4	278	15	0.000902215	50.0667	0	15	0.989831	0.368137
ALK	ALK	2.14286	0.628571	0.466667	FALSE	0	0	4	434	15	0.00197331	42.1333	0	15	0.988218	0.372271
TGFBR1	TGFBR1	2.07483	0.771429	0.481967	FALSE	0	0	4	110	15	0.000315877	50.0667	0	15	0.988919	0.407046
FLT1	FLT1	2.01361	0.866667	0.496622	FALSE	0	0	4	72	15	0.0001593	54.8667	0	15	0.98955	0.415657
ERN1	ERN1	2.02041	0.761905	0.494949	FALSE	0	0	4	84	15	0.000190231	47.8667	0	15	0.98948	0.365394
MMP13	MMP13	2.01361	0.824176	0.496622	FALSE	0	0	4	146	14	0.000462278	56.0714	0	14	0.98955	0.42159
WNT3A	WNT3A	1.9932	0.802198	0.501706	FALSE	0	0	4	120	14	0.000301608	53.7143	0	14	0.989761	0.394958
F3	F3	2.04762	0.725275	0.488372	FALSE	0	0	4	100	14	0.000427176	45.2143	0	14	0.9892	0.353237
VCP	VCP	2.12245	0.505495	0.471154	FALSE	0	0	4	246	14	0.00118852	35.7143	0	14	0.988428	0.30525
IDH1	IDH1	2.12925	0.67033	0.469649	FALSE	0	0	4	114	14	0.000317055	41	0	14	0.988358	0.353448
ADRB2	ADRB2	2.04082	0.512821	0.49	FALSE	0	0	4	370	13	0.0012855	40.6923	0	13	0.98927	0.313018
PPARD	PPARD	2.01361	0.615385	0.496622	FALSE	0	0	4	380	13	0.00087928	43.6923	0	13	0.98955	0.326062
TTR	TTR	2.04082	0.333333	0.49	FALSE	0	0	4	758	13	0.00337925	29.1538	0	13	0.98927	0.22426
PRKCE	PRKCE	2.07483	0.602564	0.481967	FALSE	0	0	3	164	13	0.000451937	42.0769	0	13	0.988919	0.342089
BCL2	BCL2	2.12245	0.590909	0.471154	FALSE	0	0	4	200	12	0.000614902	46.0833	0	12	0.988428	0.387255
CETP	CETP	2.26531	0.469697	0.441441	FALSE	0	0	4	228	12	0.00167158	24.8333	0	12	0.986956	0.253401
GRM5	GRM5	2.10204	0.363636	0.475728	FALSE	0	0	3	670	11	0.0025637	34.6364	0	11	0.988639	0.286251
CYP2D6	CYP2D6	2.29932	0.545455	0.434911	FALSE	0	0	4	320	11	0.00111024	22.8182	0	11	0.986605	0.245357
ELANE	ELANE	2.12245	0.727273	0.471154	FALSE	0	0	4	62	11	0.00027007	46.5455	0	11	0.988428	0.387879
ROCK1	ROCK1	2.13605	0.927273	0.468153	FALSE	0	0	4	10	11	1.99535e-05	58.2727	0	11	0.988288	0.489687
CES1	CES1	2.19048	0.381818	0.456522	FALSE	0	0	3	504	11	0.0024523	22.8182	0	11	0.987727	0.212404
NR1H2	NR1H2	2.28571	0.727273	0.4375	FALSE	0	0	4	80	11	0.00027975	29.2727	0	11	0.986745	0.304924
NR1I3	NR1I3	2.21088	0.688889	0.452308	FALSE	0	0	4	236	10	0.000414917	31.3	0	10	0.987517	0.292523
IDO1	IDO1	2.10204	0.622222	0.475728	FALSE	0	0	3	202	10	0.000569549	41.2	0	10	0.988639	0.337705
MAPK13	MAPK13	2.14966	0.8	0.46519	FALSE	0	0	4	54	10	8.89529e-05	46.2	0	10	0.988148	0.394872
IGFBP1	IGFBP1	2.05442	0.511111	0.486755	FALSE	0	0	4	230	10	0.000620054	43.7	0	10	0.98913	0.333588
CXCR3	CXCR3	2.09524	0.6	0.477273	FALSE	0	0	3	172	10	0.000822545	45.7	0	10	0.988709	0.371545
SHBG	SHBG	2.12925	0.377778	0.469649	FALSE	0	0	4	414	10	0.00179773	28	0	10	0.988358	0.233333
MIF	MIF	2.08844	0.972222	0.478827	FALSE	0	0	4	2	9	3.88283e-06	66.3333	0	9	0.988779	0.52231
EIF4A1	EIF4A1	2.18367	0.611111	0.457944	FALSE	0	0	4	130	9	0.000574821	44	0	9	0.987797	0.389381
AOC3	AOC3	2.17007	0.361111	0.460815	FALSE	0	0	3	964	9	0.00538423	29.3333	0	9	0.987937	0.259587
CDK8	CDK8	2.14966	0.638889	0.46519	FALSE	0	0	4	88	9	0.000271438	40.8889	0	9	0.988148	0.346516
NPC1L1	NPC1L1	2.23129	0.666667	0.448171	FALSE	0	0	4	124	9	0.000253142	28	0	9	0.987306	0.264151
ADRB3	ADRB3	2.30612	0.535714	0.433628	FALSE	0	0	4	98	8	0.000590796	31.875	0	8	0.986535	0.332031
MAP3K8	MAP3K8	2.15646	0.821429	0.463722	FALSE	0	0	4	10	8	3.60174e-05	54.625	0	8	0.988078	0.462924
PABPC1	PABPC1	2.30612	0.285714	0.433628	FALSE	0	0	4	488	8	0.00370662	25.375	0	8	0.986535	0.265789
XDH	XDH	2.12925	0.464286	0.469649	FALSE	0	0	4	174	8	0.000658791	41.5	0	8	0.988358	0.341942
GC	GC	2.48299	0.464286	0.40274	FALSE	0	0	4	62	8	0.000375725	19.125	0	8	0.984711	0.273214
IGFBP2	IGFBP2	2.15646	0.761905	0.463722	FALSE	0	0	4	52	7	0.000168804	51.1429	0	7	0.988078	0.429772
GPR55	GPR55	2.14286	0.666667	0.466667	FALSE	0	0	4	178	7	0.000696584	43	0	7	0.988218	0.355372
FPR2	FPR2	2.17687	0.666667	0.459375	FALSE	0	0	4	40	7	0.000180897	46.5714	0	7	0.987867	0.401478
CTSS	CTSS	2.2585	0.571429	0.442771	FALSE	0	0	4	50	7	0.000153813	39.4286	0	7	0.987026	0.379121
HCAR2	HCAR2	2.19048	0.571429	0.456522	FALSE	0	0	4	178	7	0.000774393	32.2857	0	7	0.987727	0.283208
CFD	CFD	2.16327	0.857143	0.462264	FALSE	0	0	4	10	7	5.51917e-05	42.2857	0	7	0.988008	0.358354
RPS6KA3	RPS6KA3	2.27891	0.952381	0.438806	FALSE	0	0	4	2	7	3.58415e-06	51.5714	0	7	0.986815	0.505602
FDFT1	FDFT1	2.41497	0.666667	0.414085	FALSE	0	0	4	40	7	0.000237404	26	0	7	0.985413	0.323214
HSD11B1	HSD11B1	2.12245	0.619048	0.471154	FALSE	0	0	3	194	7	0.000569194	44	0	7	0.988428	0.360656
ALDH2	ALDH2	2.58503	0.0666667	0.386842	FALSE	0	0	4	4680	6	0.0273398	12.6667	0	6	0.983659	0.226415
IGFBP5	IGFBP5	2.23129	0.733333	0.448171	FALSE	0	0	4	10	6	3.89279e-05	43.1667	0	6	0.987306	0.396024
PHLPP2	PHLPP2	2.2381	1	0.446809	FALSE	0	0	4	0	6	0	54.3333	0	6	0.987236	0.503086
CES2	CES2	2.64626	0.866667	0.377892	FALSE	0	0	4	4	6	2.58855e-05	18.5	0	6	0.983028	0.385417
HTR2A	HTR2A	2.63946	0.4	0.378866	FALSE	0	0	4	116	6	0.000623104	16.3333	0	6	0.983098	0.326667
P2RX7	P2RX7	2.21088	0.8	0.452308	FALSE	0	0	4	14	5	5.09338e-05	54.4	0	5	0.987517	0.481416
MERTK	MERTK	2.28571	0.6	0.4375	FALSE	0	0	4	54	5	0.000140913	40.4	0	5	0.986745	0.39802
SRD5A2	SRD5A2	2.40136	0.8	0.416431	FALSE	0	0	4	16	5	9.13638e-05	32.4	0	5	0.985553	0.381176
CCNC	CCNC	2.26531	0.8	0.441441	FALSE	0	0	4	10	5	2.27012e-05	38.8	0	5	0.986956	0.369524
CNR2	CNR2	2.48299	1	0.40274	FALSE	0	0	4	0	4	0	25	0	4	0.984711	0.337838
HDAC8	HDAC8	2.34014	1	0.427326	FALSE	0	0	4	0	4	0	53	0	4	0.986184	0.557895
FTO	FTO	2.4898	0.666667	0.401639	FALSE	0	0	4	2	3	2.3297e-05	30.3333	0	3	0.984641	0.40991
ALOX12	ALOX12	2.52381	1	0.396226	FALSE	0	0	4	0	3	0	30	0	3	0.984291	0.434783
CCR9	CCR9	2.31293	1	0.432353	FALSE	0	0	3	0	2	0	53	0	2	0.986465	0.535354
PREP	PREP	2.59864	1	0.384817	FALSE	0	0	4	0	2	0	37	0	2	0.983519	0.606557
IL6ST	IL6ST	2.53061	1	0.395161	FALSE	0	0	4	0	2	0	50	0	2	0.98422	0.684932
PRMT3	PRMT3	2.89116	0	0.345882	FALSE	0	0	5	12	2	6.62902e-05	13.5	0	2	0.980504	0.520833
AKR1A1	AKR1A1	3.57823	0	0.279468	FALSE	0	0	5	0	1	0	6	0	1	0.97342	0
AKR1B10	AKR1B10	3.57823	0	0.279468	FALSE	0	0	5	0	1	0	6	0	1	0.97342	0
LIPA	LIPA	2.95238	0	0.33871	FALSE	0	0	5	0	1	0	20	0	1	0.979872	0
