# Supplementary material for: Mechanisms of Yinchen combined with Huangbai against Non-alcoholic fatty liver disease based on Network pharmacology, Molecular docking and Molecular Dynamics Simulations
Source: Research Square preprint supplement (doi:10.21203/rs.3.rs-7535069/v1), 2025-10-17
Supplement: Supplementary file 9 [file e824da130eca0d7525af12f2.docx]

TABLE 1: The active compounds information of *Yinchen*.

| Mol ID | Molecule name | Structure（2D） | OB (%) | DL |
| --- | --- | --- | --- | --- |
| MOL008047 | Artepillin A | 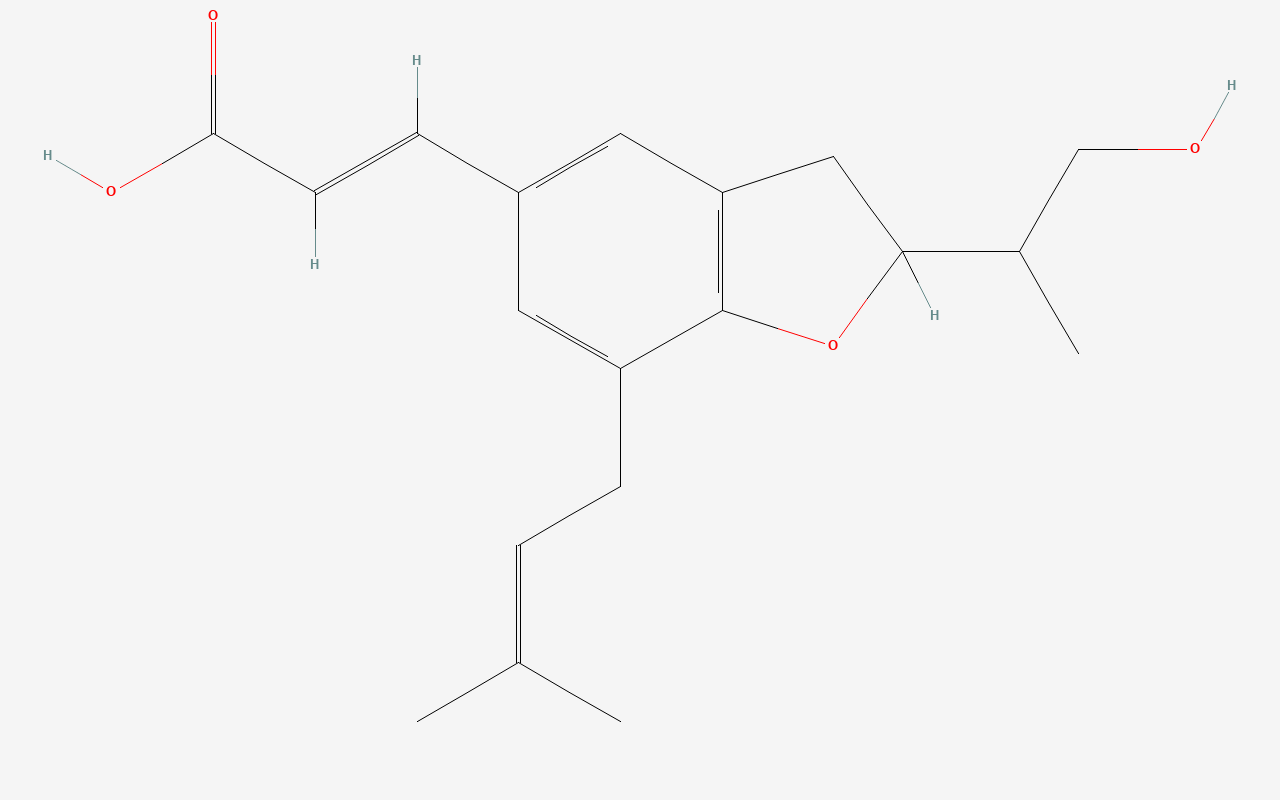 | 68.32 | 0.24 |
| MOL005573 | [Genkwanin](https://old.tcmsp-e.com/molecule.php?qn=5573) | 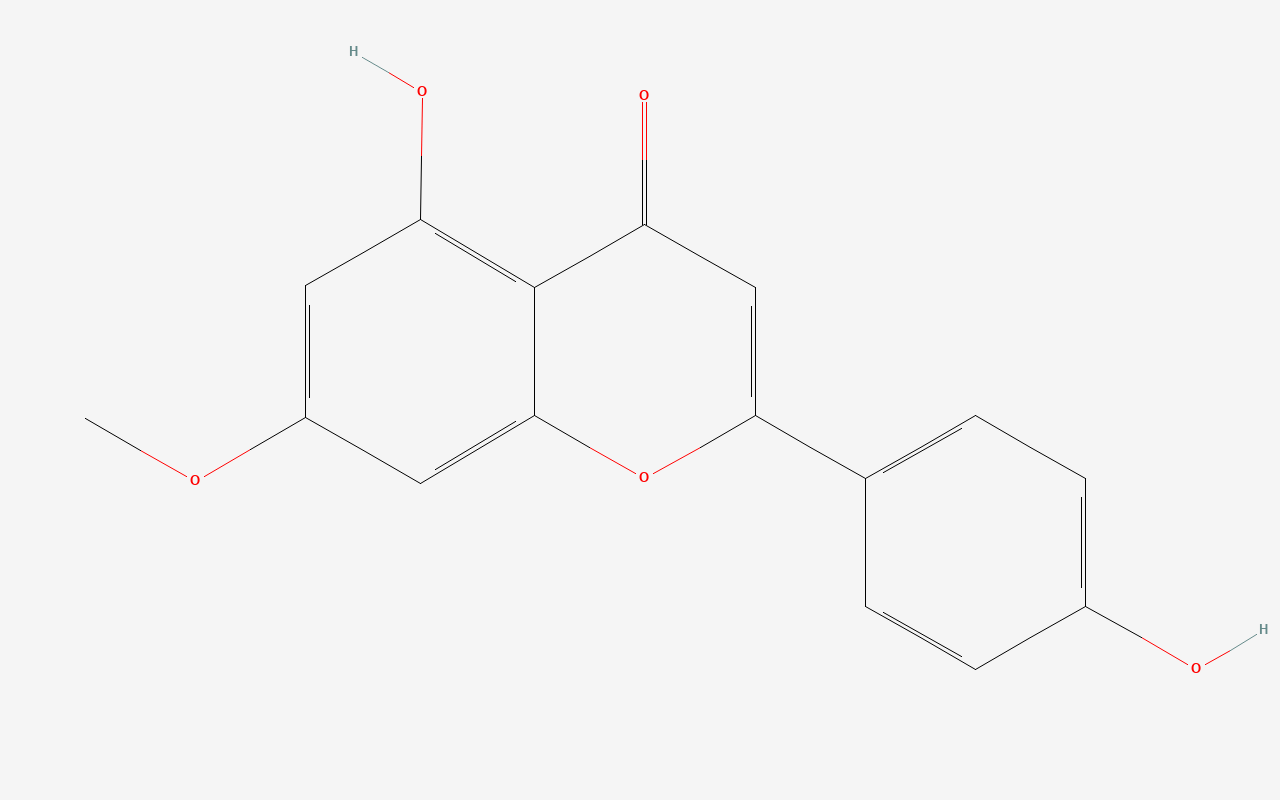 | 37.13 | 0.24 |
| MOL008046 | [Demethoxycapillarisin](https://old.tcmsp-e.com/molecule.php?qn=8046) | 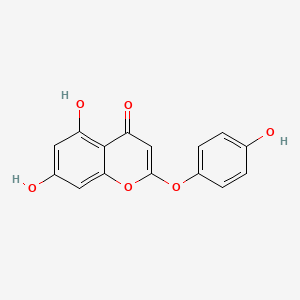 | 52.33 | 0.25 |
| MOL000098 | [quercetin](https://old.tcmsp-e.com/molecule.php?qn=98) | 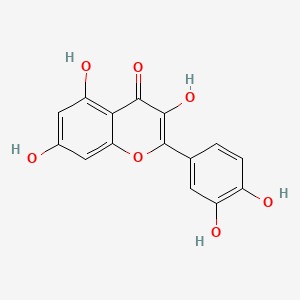 | 46.43 | 0.28 |
| MOL007274 | [Skrofulein](https://old.tcmsp-e.com/molecule.php?qn=7274) | 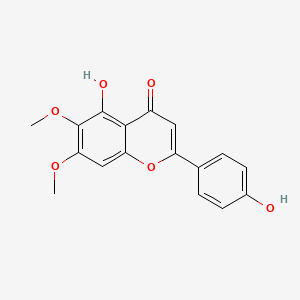 | 30.35 | 0.3 |
| MOL000354 | [isorhamnetin](https://old.tcmsp-e.com/molecule.php?qn=354) | 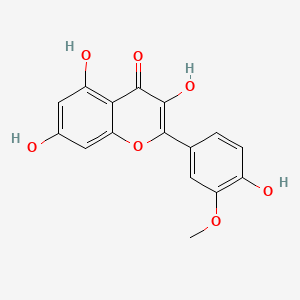 | 49.6 | 0.31 |
| MOL008043 | [capillarisin](https://old.tcmsp-e.com/molecule.php?qn=8043) | 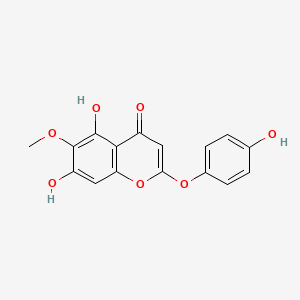 | 57.56 | 0.31 |
| MOL008040 | [Eupalitin](https://old.tcmsp-e.com/molecule.php?qn=8040) | 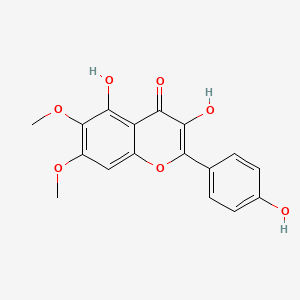 | 46.11 | 0.33 |
| MOL008045 | [4'-Methylcapillarisin](https://old.tcmsp-e.com/molecule.php?qn=8045) | 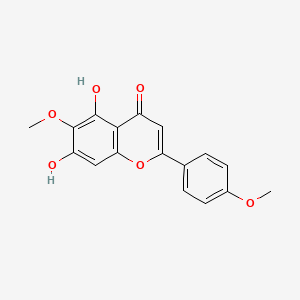 | 72.18 | 0.35 |
| MOL008041 | [Eupatolitin](https://old.tcmsp-e.com/molecule.php?qn=8041) | 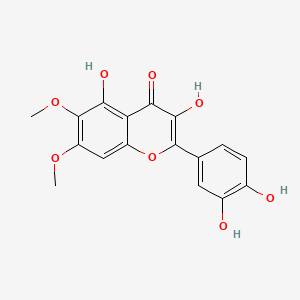 | 42.55 | 0.37 |
| MOL008039 | [Isoarcapillin](https://old.tcmsp-e.com/molecule.php?qn=8039) | 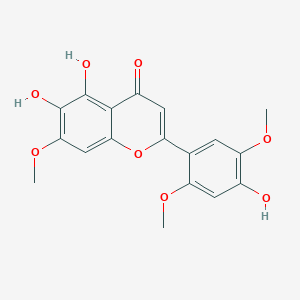 | 57.4 | 0.41 |
| MOL000358 | [beta-sitosterol](https://old.tcmsp-e.com/molecule.php?qn=358) | 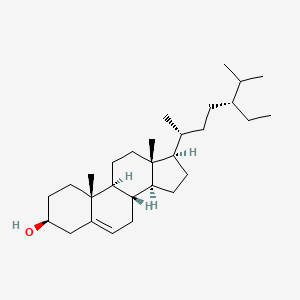 | 36.91 | 0.75 |
