# Supplementary material for: Mechanisms of Yinchen combined with Huangbai against Non-alcoholic fatty liver disease based on Network pharmacology, Molecular docking and Molecular Dynamics Simulations
Source: Research Square preprint supplement (doi:10.21203/rs.3.rs-7535069/v1), 2025-10-17
Supplement: Supplementary file 10 [file e93c72506753e379a584c7a1.docx]

TABLE 6: Molecular docking simulation information of active components and targets.

| Target | Target (PDB ID) | Target Structure | Compound | Compound  (MOL ID) | Affinity  (Kcal/mol) |
| --- | --- | --- | --- | --- | --- |
| TNF | 5UUI | 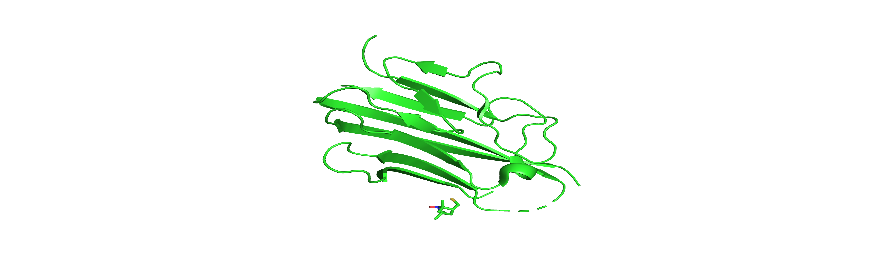 | Genkwanin  Rutaecarpine | MOL005573  MOL002662 | -6.21  -7.63 |
| AKT1 | 1UNQ | 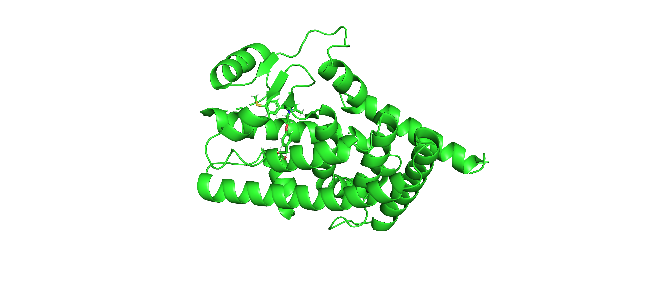 | Genkwanin  Rutaecarpine | MOL005573  MOL002662 | -6.21  -6.77 |
| PPARG | 7E0A | 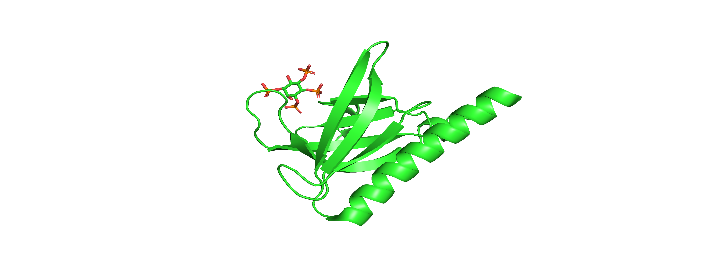 | Genkwanin  Rutaecarpine | MOL005573  MOL002662 | -7.36  -9.44 |
| STAT3 | 6NJS | 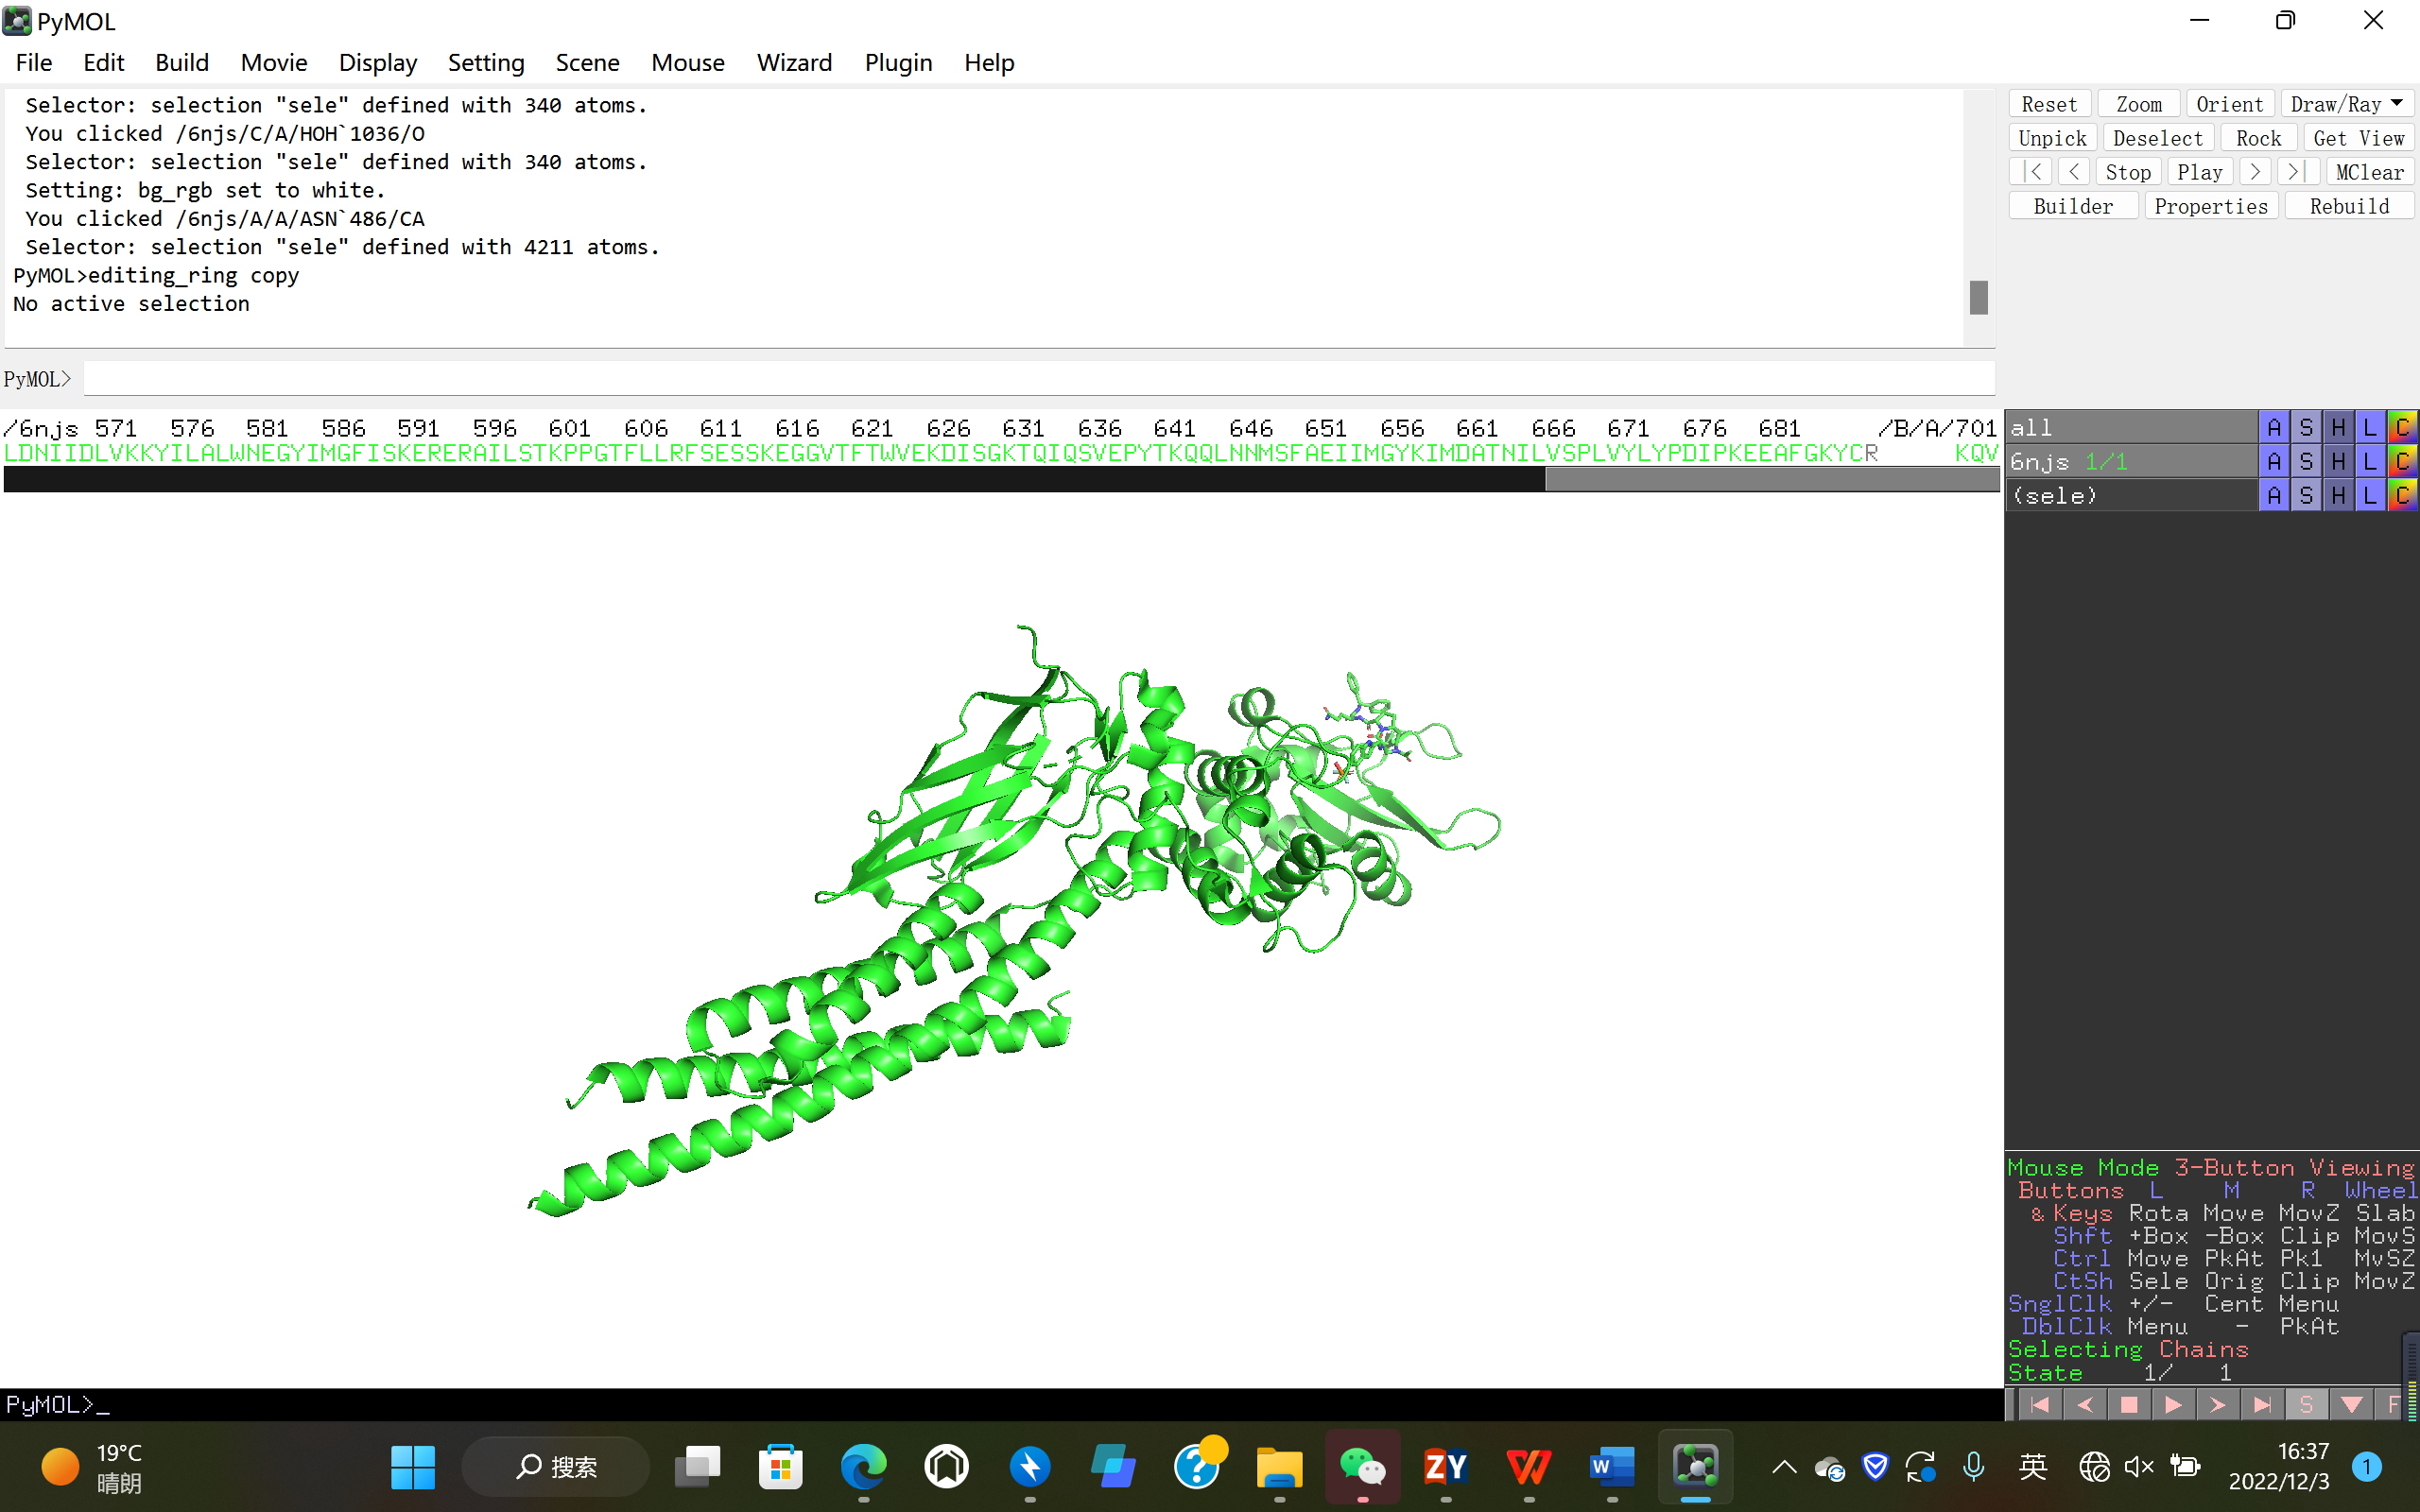 | Genkwanin  Rutaecarpine | MOL005573  MOL002662 | -5.03  -6.5 |
| HSP90AA1 | 7S9H | 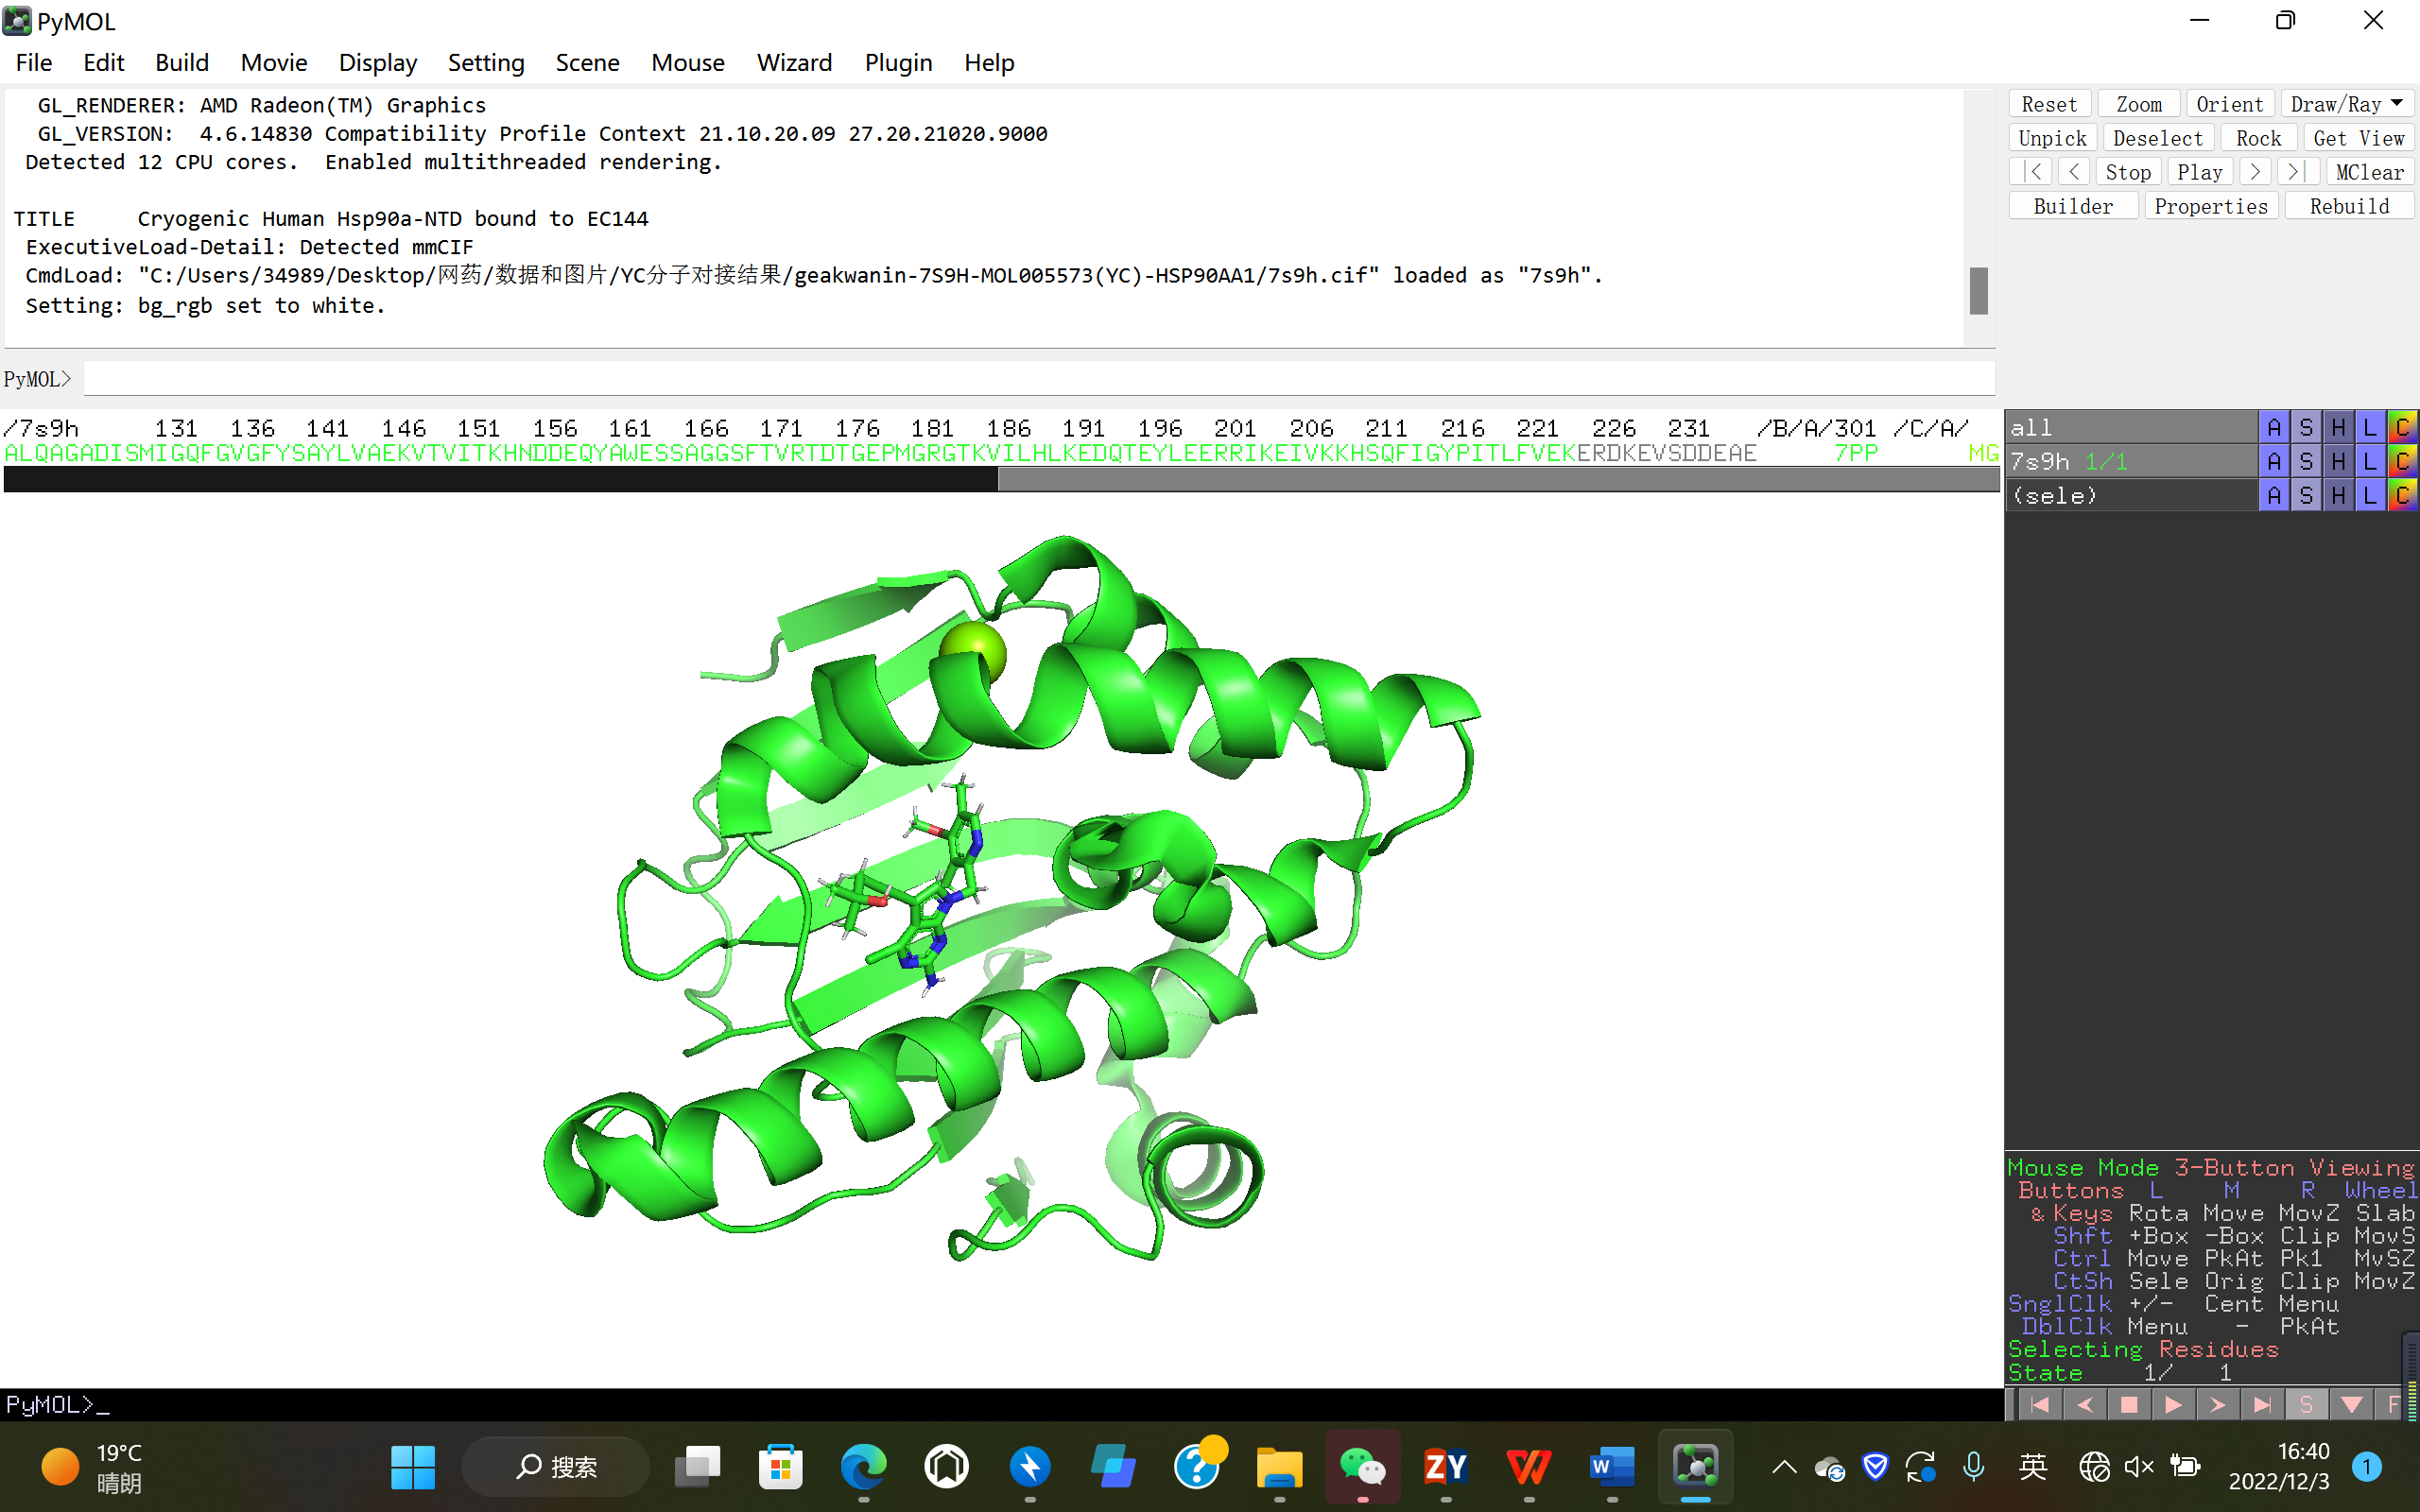 | Genkwanin  Rutaecarpine | MOL005573  MOL002662 | -7.68  -6.9 |
